# Supplementary material for: Prediction of ionic conductivity of imidazolium-based ionic liquids at different temperatures using multiple linear regression and support vector machine algorithms
Source: Royal Society of Chemistry journal article supplement (doi:10.1039/d1nj01831k), 2021-01-01
Supplement: d1nj01831k1.pdf [file d1nj01831k1.pdf]

## SUPPLEMENTARY INFORMATION

### Prediction of the Ionic Conductivity of Imidazolium-based Ionic Liquids at Different Temperatures using Multiple Linear Regression and Support Vector Machine Algorithms

Zi Kang Koi,<sup>a</sup> Wan Zaireen Nisa Yahya,<sup>\*a,b</sup> and Kiki Adi Kurnia<sup>c</sup>

<sup>a</sup> Department of Chemical Engineering, Universiti Teknologi PETRONAS, 32610 Seri Iskandar, Perak Darul Ridzuan, Malaysia.

<sup>b</sup> Center of Research in Ionic Liquids, Universiti Teknologi PETRONAS, 32610 Seri Iskandar, Perak Darul Ridzuan, Malaysia.

<sup>c</sup> Department of Chemical Engineering, Faculty of Industrial Technology, Institut Teknologi Bandung, Jl. Ganesha No. 10, Bandung, 40132 Indonesia.

\*Corresponding author:

Tel.: +605-368 7584

E-mail address: [zaireen.yahya@utp.edu.my](mailto:zaireen.yahya@utp.edu.my)

**Table S1.** IL cation-anion interaction energies and dielectric energy generated using COSMO-RS

| Ionic Liquids                                                                       | Reference | Set      | $T/K$  | $\sigma_{exp}/S \cdot m^{-1}$ | $\ln \sigma_{exp}$ | Interaction Energy/ $kcal \cdot mol^{-1}$ |                |                 |                |                  |                 |                   |                  |
|-------------------------------------------------------------------------------------|-----------|----------|--------|-------------------------------|--------------------|-------------------------------------------|----------------|-----------------|----------------|------------------|-----------------|-------------------|------------------|
|                                                                                     |           |          |        |                               |                    | $E_{MF,Cation}$                           | $E_{MF,Anion}$ | $E_{HB,Cation}$ | $E_{HB,Anion}$ | $E_{vdW,Cation}$ | $E_{vdW,Anion}$ | $E_{Diel,Cation}$ | $E_{Diel,Anion}$ |
| [C <sub>4</sub> C <sub>1</sub> im][BF <sub>4</sub> ]                                | [2]       | Training | 313.20 | 0.4460                        | -0.8074            | 5.1834                                    | 1.4762         | -1.3746         | -1.3743        | -9.1328          | -3.3948         | -50.0718          | -62.9105         |
| [C <sub>4</sub> C <sub>1</sub> im][BF <sub>4</sub> ]                                | [2]       | Training | 318.20 | 0.5420                        | -0.6125            | 5.2324                                    | 1.4947         | -1.3519         | -1.3516        | -9.0807          | -3.3755         | -50.0718          | -62.9105         |
| [C <sub>4</sub> C <sub>1</sub> im][BF <sub>4</sub> ]                                | [2]       | Training | 323.20 | 0.6510                        | -0.4292            | 5.2810                                    | 1.5133         | -1.3285         | -1.3281        | -9.0277          | -3.3559         | -50.0718          | -62.9105         |
| [C <sub>4</sub> C <sub>1</sub> im][BF <sub>4</sub> ]                                | [2]       | Training | 328.20 | 0.7830                        | -0.2446            | 5.3291                                    | 1.5321         | -1.3044         | -1.3040        | -8.9740          | -3.3360         | -50.0718          | -62.9105         |
| [C <sub>6</sub> C <sub>1</sub> im][BF <sub>4</sub> ]                                | [2]       | Training | 288.15 | 0.0672                        | -2.7001            | 5.1545                                    | 1.6427         | -1.4300         | -1.4287        | -11.4416         | -3.4973         | -50.1150          | -62.9105         |
| [C <sub>6</sub> C <sub>1</sub> im][BF <sub>4</sub> ]                                | [2]       | Training | 298.15 | 0.1229                        | -2.0964            | 5.2747                                    | 1.6870         | -1.3894         | -1.3879        | -11.3270         | -3.4625         | -50.1150          | -62.9105         |
| [C <sub>6</sub> C <sub>1</sub> im][BF <sub>4</sub> ]                                | [2]       | Training | 318.15 | 0.3260                        | -1.1209            | 5.5079                                    | 1.7765         | -1.3001         | -1.2984        | -11.0822         | -3.3880         | -50.1150          | -62.9105         |
| [C <sub>6</sub> C <sub>1</sub> im][BF <sub>4</sub> ]                                | [2]       | Training | 328.15 | 0.4830                        | -0.7277            | 5.6206                                    | 1.8217         | -1.2517         | -1.2499        | -10.9533         | -3.3486         | -50.1150          | -62.9105         |
| [C <sub>6</sub> C <sub>1</sub> im][BF <sub>4</sub> ]                                | [2]       | Training | 338.15 | 0.6830                        | -0.3813            | 5.7308                                    | 1.8672         | -1.2011         | -1.1993        | -10.8208         | -3.3080         | -50.1150          | -62.9105         |
| [C <sub>6</sub> C <sub>1</sub> im][BF <sub>4</sub> ]                                | [2]       | Training | 348.15 | 0.9260                        | -0.0769            | 5.8383                                    | 1.9131         | -1.1487         | -1.1469        | -10.6854         | -3.2665         | -50.1150          | -62.9105         |
| [C <sub>6</sub> C <sub>1</sub> im][BF <sub>4</sub> ]                                | [2]       | Training | 358.15 | 1.2140                        | 0.1939             | 5.9430                                    | 1.9592         | -1.0950         | -1.0931        | -10.5477         | -3.2242         | -50.1150          | -62.9105         |
| [C <sub>4</sub> C <sub>1</sub> im][CH <sub>3</sub> CO <sub>2</sub> ]                | [2]       | Training | 348.15 | 0.5360                        | -0.6236            | 8.3957                                    | 4.1484         | -4.0799         | -4.0634        | -9.4293          | -3.9096         | -50.0718          | -79.6259         |
| [C <sub>4</sub> C <sub>1</sub> im][CH <sub>3</sub> CO <sub>2</sub> ]                | [2]       | Training | 338.15 | 0.3720                        | -0.9889            | 8.2868                                    | 4.0826         | -4.2879         | -4.2707        | -9.5489          | -3.9588         | -50.0718          | -79.6259         |
| [C <sub>4</sub> C <sub>1</sub> im][CH <sub>3</sub> CO <sub>2</sub> ]                | [2]       | Training | 328.15 | 0.2470                        | -1.3984            | 8.1776                                    | 4.0172         | -4.4893         | -4.4714        | -9.6658          | -4.0068         | -50.0718          | -79.6259         |
| [C <sub>4</sub> C <sub>1</sub> im][CH <sub>3</sub> CO <sub>2</sub> ]                | [2]       | Training | 318.15 | 0.1540                        | -1.8708            | 8.0686                                    | 3.9525         | -4.6821         | -4.6635        | -9.7795          | -4.0534         | -50.0718          | -79.6259         |
| [C <sub>4</sub> C <sub>1</sub> im][CH <sub>3</sub> CO <sub>2</sub> ]                | [2]       | Training | 308.15 | 0.0830                        | -2.4889            | 7.9598                                    | 3.8888         | -4.8645         | -4.8452        | -9.8895          | -4.0984         | -50.0718          | -79.6259         |
| [C <sub>4</sub> C <sub>1</sub> im][CH <sub>3</sub> CO <sub>2</sub> ]                | [2]       | Training | 298.15 | 0.0420                        | -3.1701            | 7.8517                                    | 3.8263         | -5.0354         | -5.0155        | -9.9952          | -4.1415         | -50.0718          | -79.6259         |
| [C <sub>4</sub> C <sub>1</sub> im][CH <sub>3</sub> CO <sub>2</sub> ]                | [2]       | Training | 288.15 | 0.0190                        | -3.9633            | 7.7444                                    | 3.7652         | -5.1942         | -5.1735        | -10.0962         | -4.1826         | -50.0718          | -79.6259         |
| [C <sub>4</sub> C <sub>1</sub> im][CH <sub>3</sub> CO <sub>2</sub> ]                | [2]       | Training | 323.15 | 0.2210                        | -1.5096            | 8.1231                                    | 3.9847         | -4.5869         | -4.5686        | -9.7230          | -4.0303         | -50.0718          | -79.6259         |
| [C <sub>4</sub> C <sub>1</sub> im][CH <sub>3</sub> CO <sub>2</sub> ]                | [2]       | Training | 313.15 | 0.1310                        | -2.0326            | 8.0141                                    | 3.9206         | -4.7747         | -4.7557        | -9.8350          | -4.0761         | -50.0718          | -79.6259         |
| [C <sub>4</sub> C <sub>1</sub> im][CH <sub>3</sub> CO <sub>2</sub> ]                | [2]       | Training | 303.15 | 0.0699                        | -2.6607            | 7.9057                                    | 3.8574         | -4.9515         | -4.9318        | -9.9429          | -4.1202         | -50.0718          | -79.6259         |
| [C <sub>4</sub> C <sub>1</sub> im][CH <sub>3</sub> CO <sub>2</sub> ]                | [2]       | Training | 293.15 | 0.0331                        | -3.4082            | 7.7980                                    | 3.7956         | -5.1163         | -5.0961        | -10.0463         | -4.1624         | -50.0718          | -79.6259         |
| [C <sub>4</sub> C <sub>1</sub> im][CH <sub>3</sub> CO <sub>2</sub> ]                | [2]       | Training | 283.15 | 0.0131                        | -4.3351            | 7.6911                                    | 3.7352         | -5.2689         | -5.2479        | -10.1447         | -4.2023         | -50.0718          | -79.6259         |
| [C <sub>2</sub> C <sub>1</sub> im][C <sub>8</sub> H <sub>17</sub> SO <sub>4</sub> ] | [2]       | Training | 278.10 | 0.0120                        | -4.4228            | 4.0829                                    | 4.8510         | -2.4581         | -2.4539        | -7.8920          | -12.7044        | -50.6750          | -72.5310         |
| [C <sub>2</sub> C <sub>1</sub> im][C <sub>8</sub> H <sub>17</sub> SO <sub>4</sub> ] | [2]       | Training | 283.10 | 0.0170                        | -4.0745            | 4.1256                                    | 4.9236         | -2.4198         | -2.4155        | -7.8588          | -12.6436        | -50.6750          | -72.5310         |
| [C <sub>2</sub> C <sub>1</sub> im][C <sub>8</sub> H <sub>17</sub> SO <sub>4</sub> ] | [2]       | Training | 288.10 | 0.0250                        | -3.6889            | 4.1681                                    | 4.9958         | -2.3804         | -2.3761        | -7.8245          | -12.5812        | -50.6750          | -72.5310         |
| [C <sub>2</sub> C <sub>1</sub> im][C <sub>8</sub> H <sub>17</sub> SO <sub>4</sub> ] | [2]       | Training | 298.10 | 0.0460                        | -3.0791            | 4.2526                                    | 5.1387         | -2.2984         | -2.2940        | -7.7526          | -12.4516        | -50.6750          | -72.5310         |
| [C <sub>4</sub> C <sub>1</sub> im][CF <sub>3</sub> CO <sub>2</sub> ]                | [2]       | Training | 308.15 | 0.6570                        | -0.4201            | 5.3886                                    | 2.3907         | -2.7400         | -2.7289        | -9.0956          | -4.1631         | -50.0718          | -64.7784         |
| [C <sub>4</sub> C <sub>1</sub> im][CF <sub>3</sub> CO <sub>2</sub> ]                | [2]       | Training | 313.15 | 0.7820                        | -0.2459            | 5.4444                                    | 2.4234         | -2.6806         | -2.6698        | -9.0477          | -4.1409         | -50.0718          | -64.7784         |

|                                                                                                    |     |          |        |        |         |        |        |         |         |          |         |          |          |
|----------------------------------------------------------------------------------------------------|-----|----------|--------|--------|---------|--------|--------|---------|---------|----------|---------|----------|----------|
| [C <sub>4</sub> C <sub>1</sub> im][CF <sub>3</sub> CO <sub>2</sub> ]                               | [2] | Training | 328.15 | 1.2200 | 0.1989  | 5.6097 | 2.5213 | -2.4972 | -2.4869 | -8.8985  | -4.0715 | -50.0718 | -64.7784 |
| [C <sub>4</sub> C <sub>1</sub> im][CF <sub>3</sub> CO <sub>2</sub> ]                               | [2] | Training | 338.15 | 1.5600 | 0.4447  | 5.7179 | 2.5865 | -2.3717 | -2.3618 | -8.7950  | -4.0232 | -50.0718 | -64.7784 |
| [C <sub>4</sub> C <sub>1</sub> im][CF <sub>3</sub> CO <sub>2</sub> ]                               | [2] | Training | 343.15 | 1.7500 | 0.5596  | 5.7714 | 2.6190 | -2.3084 | -2.2987 | -8.7422  | -3.9986 | -50.0718 | -64.7784 |
| [C <sub>4</sub> C <sub>1</sub> im][CF <sub>3</sub> CO <sub>2</sub> ]                               | [2] | Training | 348.15 | 1.9300 | 0.6575  | 5.8243 | 2.6515 | -2.2448 | -2.2354 | -8.6888  | -3.9737 | -50.0718 | -64.7784 |
| [C <sub>2</sub> C <sub>1</sub> im][CH <sub>3</sub> SO <sub>3</sub> ]                               | [2] | Training | 353.15 | 1.9940 | 0.6901  | 7.4903 | 4.0372 | -2.7385 | -2.7593 | -7.3406  | -4.5248 | -50.6750 | -76.8542 |
| [C <sub>2</sub> C <sub>1</sub> im][CH <sub>3</sub> SO <sub>3</sub> ]                               | [2] | Training | 343.15 | 1.5460 | 0.4357  | 7.4034 | 3.9887 | -2.8718 | -2.8931 | -7.4352  | -4.5831 | -50.6750 | -76.8542 |
| [C <sub>2</sub> C <sub>1</sub> im][CH <sub>3</sub> SO <sub>3</sub> ]                               | [2] | Training | 333.15 | 1.1510 | 0.1406  | 7.3153 | 3.9397 | -3.0010 | -3.0229 | -7.5279  | -4.6402 | -50.6750 | -76.8542 |
| [C <sub>2</sub> C <sub>1</sub> im][CH <sub>3</sub> SO <sub>3</sub> ]                               | [2] | Training | 323.15 | 0.8210 | -0.1972 | 7.2263 | 3.8901 | -3.1250 | -3.1473 | -7.6183  | -4.6959 | -50.6750 | -76.8542 |
| [C <sub>2</sub> C <sub>1</sub> im][CH <sub>3</sub> SO <sub>3</sub> ]                               | [2] | Training | 313.15 | 0.5530 | -0.5924 | 7.1365 | 3.8401 | -3.2428 | -3.2655 | -7.7061  | -4.7498 | -50.6750 | -76.8542 |
| [C <sub>2</sub> C <sub>1</sub> im][CH <sub>3</sub> SO <sub>3</sub> ]                               | [2] | Training | 308.15 | 0.4351 | -0.8322 | 7.0914 | 3.8149 | -3.2990 | -3.3220 | -7.7488  | -4.7761 | -50.6750 | -76.8542 |
| [C <sub>2</sub> C <sub>1</sub> im][CH <sub>3</sub> SO <sub>3</sub> ]                               | [2] | Training | 303.15 | 0.3464 | -1.0602 | 7.0462 | 3.7897 | -3.3535 | -3.3766 | -7.7906  | -4.8018 | -50.6750 | -76.8542 |
| [C <sub>2</sub> C <sub>1</sub> im][CH <sub>3</sub> SO <sub>3</sub> ]                               | [2] | Training | 298.15 | 0.2650 | -1.3280 | 7.0009 | 3.7645 | -3.4061 | -3.4294 | -7.8316  | -4.8269 | -50.6750 | -76.8542 |
| [C <sub>2</sub> C <sub>1</sub> im][CH <sub>3</sub> SO <sub>3</sub> ]                               | [2] | Training | 293.15 | 0.1972 | -1.6235 | 6.9555 | 3.7392 | -3.4567 | -3.4802 | -7.8716  | -4.8514 | -50.6750 | -76.8542 |
| [C <sub>2</sub> C <sub>1</sub> im][CH <sub>3</sub> SO <sub>3</sub> ]                               | [2] | Training | 278.15 | 0.0656 | -2.7242 | 6.8192 | 3.6632 | -3.5973 | -3.6211 | -7.9856  | -4.9211 | -50.6750 | -76.8542 |
| [C <sub>2</sub> C <sub>1</sub> im][CH <sub>3</sub> SO <sub>3</sub> ]                               | [2] | Training | 273.15 | 0.0413 | -3.1859 | 6.7738 | 3.6379 | -3.6404 | -3.6643 | -8.0214  | -4.9430 | -50.6750 | -76.8542 |
| [C <sub>2</sub> C <sub>1</sub> im][(C <sub>2</sub> F <sub>5</sub> ) <sub>3</sub> PF <sub>3</sub> ] | [2] | Training | 278.15 | 0.2240 | -1.4961 | 2.5275 | 4.6340 | -0.1356 | -0.1361 | -6.3436  | -9.5153 | -50.6750 | -41.7902 |
| [C <sub>2</sub> C <sub>1</sub> im][(C <sub>2</sub> F <sub>5</sub> ) <sub>3</sub> PF <sub>3</sub> ] | [2] | Training | 288.15 | 0.3620 | -1.0161 | 2.5966 | 4.6914 | -0.1293 | -0.1297 | -6.2967  | -9.4329 | -50.6750 | -41.7902 |
| [C <sub>2</sub> C <sub>1</sub> im][(C <sub>2</sub> F <sub>5</sub> ) <sub>3</sub> PF <sub>3</sub> ] | [2] | Training | 308.15 | 0.7570 | -0.2784 | 2.7310 | 4.7992 | -0.1171 | -0.1175 | -6.1914  | -9.2523 | -50.6750 | -41.7902 |
| [C <sub>2</sub> C <sub>1</sub> im][(C <sub>2</sub> F <sub>5</sub> ) <sub>3</sub> PF <sub>3</sub> ] | [2] | Training | 318.15 | 1.0180 | 0.0178  | 2.7964 | 4.8498 | -0.1112 | -0.1116 | -6.1336  | -9.1550 | -50.6750 | -41.7902 |
| [C <sub>2</sub> C <sub>1</sub> im][(C <sub>2</sub> F <sub>5</sub> ) <sub>3</sub> PF <sub>3</sub> ] | [2] | Training | 338.15 | 1.6580 | 0.5056  | 2.9233 | 4.9450 | -0.0997 | -0.1000 | -6.0094  | -8.9490 | -50.6750 | -41.7902 |
| [C <sub>2</sub> C <sub>1</sub> im][(C <sub>2</sub> F <sub>5</sub> ) <sub>3</sub> PF <sub>3</sub> ] | [2] | Training | 348.15 | 2.0280 | 0.7071  | 2.9848 | 4.9897 | -0.0941 | -0.0943 | -5.9437  | -8.8414 | -50.6750 | -41.7902 |
| [C <sub>2</sub> C <sub>1</sub> im][(C <sub>2</sub> F <sub>5</sub> ) <sub>3</sub> PF <sub>3</sub> ] | [2] | Training | 358.15 | 2.4290 | 0.8875  | 3.0450 | 5.0327 | -0.0886 | -0.0888 | -5.8761  | -8.7314 | -50.6750 | -41.7902 |
| [C <sub>6</sub> C <sub>1</sub> im][(C <sub>2</sub> F <sub>5</sub> ) <sub>3</sub> PF <sub>3</sub> ] | [2] | Training | 298.15 | 0.1665 | -1.7928 | 3.6582 | 4.3155 | -0.1127 | -0.1130 | -10.1368 | -9.4516 | -50.1150 | -41.7902 |
| [C <sub>6</sub> C <sub>1</sub> im][(C <sub>2</sub> F <sub>5</sub> ) <sub>3</sub> PF <sub>3</sub> ] | [2] | Training | 303.15 | 0.2090 | -1.5654 | 3.6945 | 4.3398 | -0.1097 | -0.1100 | -10.0894 | -9.4045 | -50.1150 | -41.7902 |
| [C <sub>6</sub> C <sub>1</sub> im][(C <sub>2</sub> F <sub>5</sub> ) <sub>3</sub> PF <sub>3</sub> ] | [2] | Training | 308.15 | 0.2580 | -1.3548 | 3.7303 | 4.3636 | -0.1067 | -0.1070 | -10.0407 | -9.3563 | -50.1150 | -41.7902 |
| [C <sub>6</sub> C <sub>1</sub> im][(C <sub>2</sub> F <sub>5</sub> ) <sub>3</sub> PF <sub>3</sub> ] | [2] | Training | 313.15 | 0.3130 | -1.1616 | 3.7655 | 4.3868 | -0.1038 | -0.1041 | -9.9907  | -9.3069 | -50.1150 | -41.7902 |
| [C <sub>6</sub> C <sub>1</sub> im][(C <sub>2</sub> F <sub>5</sub> ) <sub>3</sub> PF <sub>3</sub> ] | [2] | Training | 318.15 | 0.3740 | -0.9835 | 3.8002 | 4.4095 | -0.1009 | -0.1012 | -9.9396  | -9.2565 | -50.1150 | -41.7902 |
| [C <sub>6</sub> C <sub>1</sub> im][(C <sub>2</sub> F <sub>5</sub> ) <sub>3</sub> PF <sub>3</sub> ] | [2] | Training | 328.15 | 0.5140 | -0.6655 | 3.8679 | 4.4534 | -0.0953 | -0.0955 | -9.8340  | -9.1528 | -50.1150 | -41.7902 |
| [C <sub>6</sub> C <sub>1</sub> im][(C <sub>2</sub> F <sub>5</sub> ) <sub>3</sub> PF <sub>3</sub> ] | [2] | Training | 333.15 | 0.5930 | -0.5226 | 3.9010 | 4.4746 | -0.0925 | -0.0927 | -9.7798  | -9.0996 | -50.1150 | -41.7902 |
| [C <sub>6</sub> C <sub>1</sub> im][(C <sub>2</sub> F <sub>5</sub> ) <sub>3</sub> PF <sub>3</sub> ] | [2] | Training | 338.15 | 0.6760 | -0.3916 | 3.9335 | 4.4953 | -0.0897 | -0.0899 | -9.7247  | -9.0457 | -50.1150 | -41.7902 |
| [C <sub>6</sub> C <sub>1</sub> im][(C <sub>2</sub> F <sub>5</sub> ) <sub>3</sub> PF <sub>3</sub> ] | [2] | Training | 343.15 | 0.7690 | -0.2627 | 3.9656 | 4.5156 | -0.0870 | -0.0872 | -9.6687  | -8.9911 | -50.1150 | -41.7902 |
| [C <sub>2</sub> C <sub>1</sub> im][C <sub>2</sub> H <sub>5</sub> SO <sub>4</sub> ]                 | [2] | Training | 298.10 | 0.3820 | -0.9623 | 5.2897 | 3.3804 | -2.4284 | -2.4238 | -7.7513  | -6.3435 | -50.6750 | -72.0671 |
| [C <sub>2</sub> C <sub>1</sub> im][C <sub>2</sub> H <sub>5</sub> SO <sub>4</sub> ]                 | [2] | Training | 303.10 | 0.4850 | -0.7236 | 5.3345 | 3.4132 | -2.3890 | -2.3844 | -7.7118  | -6.3098 | -50.6750 | -72.0671 |

|                                                                                                     |     |          |        |        |         |        |        |         |         |          |         |          |          |
|-----------------------------------------------------------------------------------------------------|-----|----------|--------|--------|---------|--------|--------|---------|---------|----------|---------|----------|----------|
| [C <sub>2</sub> C <sub>1</sub> im][C <sub>2</sub> H <sub>5</sub> SO <sub>4</sub> ]                  | [2] | Training | 313.10 | 0.7200 | -0.3285 | 5.4233 | 3.4781 | -2.3068 | -2.3022 | -7.6300  | -6.2402 | -50.6750 | -72.0671 |
| [C <sub>2</sub> C <sub>1</sub> im][C <sub>2</sub> H <sub>5</sub> SO <sub>4</sub> ]                  | [2] | Training | 318.10 | 0.8600 | -0.1508 | 5.4672 | 3.5104 | -2.2641 | -2.2595 | -7.5879  | -6.2044 | -50.6750 | -72.0671 |
| [C <sub>2</sub> C <sub>1</sub> im][C <sub>2</sub> H <sub>5</sub> SO <sub>4</sub> ]                  | [2] | Training | 298.15 | 0.3800 | -0.9676 | 5.2901 | 3.3808 | -2.4280 | -2.4234 | -7.7509  | -6.3431 | -50.6750 | -72.0671 |
| [C <sub>2</sub> C <sub>1</sub> im][C <sub>2</sub> H <sub>5</sub> SO <sub>4</sub> ]                  | [2] | Training | 303.15 | 0.4680 | -0.7593 | 5.3349 | 3.4135 | -2.3886 | -2.3840 | -7.7114  | -6.3094 | -50.6750 | -72.0671 |
| [C <sub>2</sub> C <sub>1</sub> im][C <sub>2</sub> H <sub>5</sub> SO <sub>4</sub> ]                  | [2] | Training | 313.15 | 0.6750 | -0.3930 | 5.4237 | 3.4784 | -2.3064 | -2.3018 | -7.6296  | -6.2399 | -50.6750 | -72.0671 |
| [C <sub>2</sub> C <sub>1</sub> im][C <sub>2</sub> H <sub>5</sub> SO <sub>4</sub> ]                  | [2] | Training | 318.15 | 0.8560 | -0.1555 | 5.4677 | 3.5107 | -2.2636 | -2.2590 | -7.5875  | -6.2041 | -50.6750 | -72.0671 |
| [C <sub>2</sub> C <sub>1</sub> im][C <sub>2</sub> H <sub>5</sub> SO <sub>4</sub> ]                  | [2] | Training | 323.15 | 1.0005 | 0.0005  | 5.5113 | 3.5427 | -2.2199 | -2.2153 | -7.5446  | -6.1677 | -50.6750 | -72.0671 |
| [C <sub>4</sub> C <sub>1</sub> im][N(C <sub>2</sub> F <sub>5</sub> SO <sub>2</sub> ) <sub>2</sub> ] | [2] | Training | 388.15 | 1.8560 | 0.6184  | 4.1922 | 4.6738 | -0.3519 | -0.3522 | -7.6604  | -8.4268 | -50.0718 | -50.3323 |
| [C <sub>4</sub> C <sub>1</sub> im][N(C <sub>2</sub> F <sub>5</sub> SO <sub>2</sub> ) <sub>2</sub> ] | [2] | Training | 378.15 | 1.5640 | 0.4472  | 4.1262 | 4.5944 | -0.3757 | -0.3761 | -7.7635  | -8.5508 | -50.0718 | -50.3323 |
| [C <sub>4</sub> C <sub>1</sub> im][N(C <sub>2</sub> F <sub>5</sub> SO <sub>2</sub> ) <sub>2</sub> ] | [2] | Training | 358.15 | 1.0500 | 0.0488  | 3.9884 | 4.4277 | -0.4252 | -0.4257 | -7.9670  | -8.7973 | -50.0718 | -50.3323 |
| [C <sub>4</sub> C <sub>1</sub> im][N(C <sub>2</sub> F <sub>5</sub> SO <sub>2</sub> ) <sub>2</sub> ] | [2] | Training | 353.15 | 0.9280 | -0.0747 | 3.9527 | 4.3844 | -0.4378 | -0.4384 | -8.0170  | -8.8583 | -50.0718 | -50.3323 |
| [C <sub>4</sub> C <sub>1</sub> im][N(C <sub>2</sub> F <sub>5</sub> SO <sub>2</sub> ) <sub>2</sub> ] | [2] | Training | 348.15 | 0.8310 | -0.1851 | 3.9164 | 4.3404 | -0.4506 | -0.4512 | -8.0666  | -8.9189 | -50.0718 | -50.3323 |
| [C <sub>4</sub> C <sub>1</sub> im][N(C <sub>2</sub> F <sub>5</sub> SO <sub>2</sub> ) <sub>2</sub> ] | [2] | Training | 343.15 | 0.7240 | -0.3230 | 3.8796 | 4.2956 | -0.4634 | -0.4640 | -8.1157  | -8.9791 | -50.0718 | -50.3323 |
| [C <sub>4</sub> C <sub>1</sub> im][N(C <sub>2</sub> F <sub>5</sub> SO <sub>2</sub> ) <sub>2</sub> ] | [2] | Training | 338.15 | 0.6380 | -0.4494 | 3.8423 | 4.2502 | -0.4762 | -0.4769 | -8.1643  | -9.0388 | -50.0718 | -50.3323 |
| [C <sub>4</sub> C <sub>1</sub> im][N(C <sub>2</sub> F <sub>5</sub> SO <sub>2</sub> ) <sub>2</sub> ] | [2] | Training | 333.15 | 0.5490 | -0.5997 | 3.8044 | 4.2040 | -0.4890 | -0.4898 | -8.2123  | -9.0980 | -50.0718 | -50.3323 |
| [C <sub>4</sub> C <sub>1</sub> im][N(C <sub>2</sub> F <sub>5</sub> SO <sub>2</sub> ) <sub>2</sub> ] | [2] | Training | 323.15 | 0.4000 | -0.9163 | 3.7270 | 4.1095 | -0.5147 | -0.5157 | -8.3062  | -9.2144 | -50.0718 | -50.3323 |
| [C <sub>4</sub> C <sub>1</sub> im][N(C <sub>2</sub> F <sub>5</sub> SO <sub>2</sub> ) <sub>2</sub> ] | [2] | Training | 318.15 | 0.3364 | -1.0895 | 3.6875 | 4.0611 | -0.5276 | -0.5286 | -8.3520  | -9.2716 | -50.0718 | -50.3323 |
| [C <sub>4</sub> C <sub>1</sub> im][N(C <sub>2</sub> F <sub>5</sub> SO <sub>2</sub> ) <sub>2</sub> ] | [2] | Training | 308.15 | 0.2274 | -1.4810 | 3.6068 | 3.9620 | -0.5532 | -0.5544 | -8.4413  | -9.3834 | -50.0718 | -50.3323 |
| [C <sub>4</sub> C <sub>1</sub> im][N(C <sub>2</sub> F <sub>5</sub> SO <sub>2</sub> ) <sub>2</sub> ] | [2] | Training | 303.15 | 0.1829 | -1.6988 | 3.5656 | 3.9114 | -0.5659 | -0.5672 | -8.4845  | -9.4379 | -50.0718 | -50.3323 |
| [C <sub>4</sub> C <sub>1</sub> im][N(C <sub>2</sub> F <sub>5</sub> SO <sub>2</sub> ) <sub>2</sub> ] | [2] | Training | 298.15 | 0.1450 | -1.9310 | 3.5239 | 3.8599 | -0.5786 | -0.5800 | -8.5268  | -9.4915 | -50.0718 | -50.3323 |
| [C <sub>4</sub> C <sub>1</sub> im][N(C <sub>2</sub> F <sub>5</sub> SO <sub>2</sub> ) <sub>2</sub> ] | [2] | Training | 288.15 | 0.0853 | -2.4616 | 3.4387 | 3.7547 | -0.6039 | -0.6055 | -8.6083  | -9.5954 | -50.0718 | -50.3323 |
| [C <sub>4</sub> C <sub>1</sub> im][N(C <sub>2</sub> F <sub>5</sub> SO <sub>2</sub> ) <sub>2</sub> ] | [2] | Training | 283.15 | 0.0634 | -2.7583 | 3.3953 | 3.7009 | -0.6165 | -0.6182 | -8.6474  | -9.6456 | -50.0718 | -50.3323 |
| [C <sub>4</sub> C <sub>1</sub> im][N(C <sub>2</sub> F <sub>5</sub> SO <sub>2</sub> ) <sub>2</sub> ] | [2] | Training | 278.15 | 0.0460 | -3.0791 | 3.3513 | 3.6462 | -0.6291 | -0.6309 | -8.6854  | -9.6947 | -50.0718 | -50.3323 |
| [C <sub>4</sub> C <sub>1</sub> im][N(C <sub>2</sub> F <sub>5</sub> SO <sub>2</sub> ) <sub>2</sub> ] | [2] | Training | 273.15 | 0.0324 | -3.4296 | 3.3067 | 3.5908 | -0.6417 | -0.6436 | -8.7222  | -9.7425 | -50.0718 | -50.3323 |
| [C <sub>4</sub> C <sub>1</sub> im][PF <sub>6</sub> ]                                                | [2] | Training | 328.15 | 0.5780 | -0.5482 | 4.2267 | 1.7328 | -0.3818 | -0.3842 | -8.5374  | -4.0506 | -50.0718 | -56.5914 |
| [C <sub>4</sub> C <sub>1</sub> im][PF <sub>6</sub> ]                                                | [2] | Training | 338.15 | 0.8150 | -0.2046 | 4.3108 | 1.7987 | -0.3678 | -0.3699 | -8.4385  | -4.0022 | -50.0718 | -56.5914 |
| [C <sub>4</sub> C <sub>1</sub> im][PF <sub>6</sub> ]                                                | [2] | Training | 348.15 | 1.1020 | 0.0971  | 4.3933 | 1.8652 | -0.3531 | -0.3550 | -8.3373  | -3.9527 | -50.0718 | -56.5914 |
| [C <sub>4</sub> C <sub>1</sub> im][PF <sub>6</sub> ]                                                | [2] | Training | 358.15 | 1.4400 | 0.3646  | 4.4742 | 1.9321 | -0.3379 | -0.3395 | -8.2341  | -3.9022 | -50.0718 | -56.5914 |
| [C <sub>4</sub> C <sub>1</sub> im][PF <sub>6</sub> ]                                                | [2] | Training | 368.15 | 1.8250 | 0.6016  | 4.5535 | 1.9991 | -0.3222 | -0.3237 | -8.1294  | -3.8509 | -50.0718 | -56.5914 |
| [C <sub>6</sub> C <sub>1</sub> im][PF <sub>6</sub> ]                                                | [2] | Training | 278.15 | 0.0117 | -4.4465 | 4.2679 | 1.6843 | -0.4208 | -0.4246 | -11.0783 | -4.2914 | -50.1150 | -56.5914 |
| [C <sub>6</sub> C <sub>1</sub> im][PF <sub>6</sub> ]                                                | [2] | Training | 288.15 | 0.0270 | -3.6104 | 4.3737 | 1.7474 | -0.4104 | -0.4138 | -10.9788 | -4.2523 | -50.1150 | -56.5914 |
| [C <sub>6</sub> C <sub>1</sub> im][PF <sub>6</sub> ]                                                | [2] | Training | 293.15 | 0.0386 | -3.2545 | 4.4256 | 1.7793 | -0.4049 | -0.4081 | -10.9269 | -4.2319 | -50.1150 | -56.5914 |
| [C <sub>6</sub> C <sub>1</sub> im][PF <sub>6</sub> ]                                                | [2] | Training | 303.15 | 0.0724 | -2.6255 | 4.5276 | 1.8433 | -0.3934 | -0.3962 | -10.8191 | -4.1894 | -50.1150 | -56.5914 |

|                                                                                       |     |          |        |        |         |        |        |         |         |          |         |          |          |
|---------------------------------------------------------------------------------------|-----|----------|--------|--------|---------|--------|--------|---------|---------|----------|---------|----------|----------|
| [C <sub>6</sub> C <sub>1</sub> im][PF <sub>6</sub> ]                                  | [2] | Training | 308.15 | 0.0964 | -2.3392 | 4.5777 | 1.8756 | -0.3873 | -0.3900 | -10.7632 | -4.1673 | -50.1150 | -56.5914 |
| [C <sub>6</sub> C <sub>1</sub> im][PF <sub>6</sub> ]                                  | [2] | Training | 313.15 | 0.1260 | -2.0715 | 4.6271 | 1.9079 | -0.3811 | -0.3836 | -10.7062 | -4.1448 | -50.1150 | -56.5914 |
| [C <sub>6</sub> C <sub>1</sub> im][PF <sub>6</sub> ]                                  | [2] | Training | 318.15 | 0.1612 | -1.8251 | 4.6759 | 1.9403 | -0.3747 | -0.3771 | -10.6481 | -4.1218 | -50.1150 | -56.5914 |
| [C <sub>6</sub> C <sub>1</sub> im][PF <sub>6</sub> ]                                  | [2] | Training | 333.15 | 0.3069 | -1.1812 | 4.8188 | 2.0378 | -0.3544 | -0.3564 | -10.4679 | -4.0505 | -50.1150 | -56.5914 |
| [C <sub>6</sub> C <sub>1</sub> im][PF <sub>6</sub> ]                                  | [2] | Training | 348.15 | 0.4830 | -0.7277 | 4.9565 | 2.1355 | -0.3328 | -0.3345 | -10.2803 | -3.9761 | -50.1150 | -56.5914 |
| [C <sub>6</sub> C <sub>1</sub> im][PF <sub>6</sub> ]                                  | [2] | Training | 328.15 | 0.2640 | -1.3318 | 4.7718 | 2.0052 | -0.3614 | -0.3635 | -10.5289 | -4.0746 | -50.1150 | -56.5914 |
| [C <sub>3</sub> C <sub>1</sub> im][SCN]                                               | [2] | Training | 323.15 | 1.3300 | 0.2852  | 5.9240 | 1.7147 | -1.8826 | -1.8753 | -9.4318  | -4.5864 | -50.1735 | -64.8886 |
| [C <sub>3</sub> C <sub>1</sub> im][SCN]                                               | [2] | Training | 318.15 | 1.1000 | 0.0953  | 5.8763 | 1.6946 | -1.9274 | -1.9198 | -9.4826  | -4.6077 | -50.1735 | -64.8886 |
| [C <sub>3</sub> C <sub>1</sub> im][SCN]                                               | [2] | Training | 313.15 | 0.9050 | -0.0998 | 5.8281 | 1.6746 | -1.9718 | -1.9640 | -9.5323  | -4.6284 | -50.1735 | -64.8886 |
| [C <sub>3</sub> C <sub>1</sub> im][SCN]                                               | [2] | Training | 308.15 | 0.7330 | -0.3106 | 5.7794 | 1.6545 | -2.0158 | -2.0078 | -9.5808  | -4.6485 | -50.1735 | -64.8886 |
| [C <sub>3</sub> C <sub>1</sub> im][SCN]                                               | [2] | Training | 303.15 | 0.5830 | -0.5396 | 5.7302 | 1.6344 | -2.0594 | -2.0512 | -9.6282  | -4.6679 | -50.1735 | -64.8886 |
| [C <sub>3</sub> C <sub>1</sub> im][SCN]                                               | [2] | Training | 298.15 | 0.4590 | -0.7787 | 5.6806 | 1.6143 | -2.1025 | -2.0942 | -9.6743  | -4.6866 | -50.1735 | -64.8886 |
| [C <sub>3</sub> C <sub>1</sub> im][SCN]                                               | [2] | Training | 293.15 | 0.3610 | -1.0189 | 5.6305 | 1.5943 | -2.1452 | -2.1367 | -9.7190  | -4.7045 | -50.1735 | -64.8886 |
| [C <sub>2</sub> C <sub>1</sub> im][N(CF <sub>3</sub> SO <sub>2</sub> ) <sub>2</sub> ] | [2] | Training | 293.15 | 0.7520 | -0.2850 | 3.0226 | 3.1181 | -0.7791 | -0.7795 | -6.8226  | -7.7581 | -50.6750 | -52.0438 |
| [C <sub>2</sub> C <sub>1</sub> im][N(CF <sub>3</sub> SO <sub>2</sub> ) <sub>2</sub> ] | [2] | Training | 313.15 | 1.3500 | 0.3001  | 3.1802 | 3.3092 | -0.7204 | -0.7206 | -6.6915  | -7.5818 | -50.6750 | -52.0438 |
| [C <sub>2</sub> C <sub>1</sub> im][N(CF <sub>3</sub> SO <sub>2</sub> ) <sub>2</sub> ] | [2] | Training | 333.15 | 2.1000 | 0.7419  | 3.3325 | 3.4932 | -0.6592 | -0.6592 | -6.5487  | -7.3937 | -50.6750 | -52.0438 |
| [C <sub>2</sub> C <sub>1</sub> im][N(CF <sub>3</sub> SO <sub>2</sub> ) <sub>2</sub> ] | [2] | Training | 353.15 | 3.0500 | 1.1151  | 3.4791 | 3.6700 | -0.5964 | -0.5962 | -6.3971  | -7.1972 | -50.6750 | -52.0438 |
| [C <sub>4</sub> C <sub>1</sub> im][N(CF <sub>3</sub> SO <sub>2</sub> ) <sub>2</sub> ] | [2] | Training | 298.15 | 0.4030 | -0.9088 | 3.6487 | 3.1844 | -0.7358 | -0.7364 | -8.7570  | -7.7428 | -50.0718 | -52.0438 |
| [C <sub>4</sub> C <sub>1</sub> im][N(CF <sub>3</sub> SO <sub>2</sub> ) <sub>2</sub> ] | [2] | Training | 323.15 | 0.9100 | -0.0943 | 3.8664 | 3.4136 | -0.6598 | -0.6601 | -8.5329  | -7.5163 | -50.0718 | -52.0438 |
| [C <sub>4</sub> C <sub>1</sub> im][N(CF <sub>3</sub> SO <sub>2</sub> ) <sub>2</sub> ] | [2] | Training | 348.15 | 1.6200 | 0.4824  | 4.0708 | 3.6303 | -0.5817 | -0.5818 | -8.2887  | -7.2742 | -50.0718 | -52.0438 |
| [C <sub>4</sub> C <sub>1</sub> im][N(CF <sub>3</sub> SO <sub>2</sub> ) <sub>2</sub> ] | [2] | Training | 301.15 | 0.4525 | -0.7930 | 3.6756 | 3.2126 | -0.7268 | -0.7274 | -8.7314  | -7.7167 | -50.0718 | -52.0438 |
| [C <sub>4</sub> C <sub>1</sub> im][N(CF <sub>3</sub> SO <sub>2</sub> ) <sub>2</sub> ] | [2] | Training | 303.15 | 0.4876 | -0.7183 | 3.6933 | 3.2312 | -0.7208 | -0.7214 | -8.7141  | -7.6991 | -50.0718 | -52.0438 |
| [C <sub>4</sub> C <sub>1</sub> im][N(CF <sub>3</sub> SO <sub>2</sub> ) <sub>2</sub> ] | [2] | Training | 305.15 | 0.5244 | -0.6455 | 3.7110 | 3.2498 | -0.7148 | -0.7154 | -8.6967  | -7.6814 | -50.0718 | -52.0438 |
| [C <sub>4</sub> C <sub>1</sub> im][N(CF <sub>3</sub> SO <sub>2</sub> ) <sub>2</sub> ] | [2] | Training | 308.15 | 0.5812 | -0.5427 | 3.7374 | 3.2776 | -0.7058 | -0.7062 | -8.6702  | -7.6545 | -50.0718 | -52.0438 |
| [C <sub>4</sub> C <sub>1</sub> im][N(CF <sub>3</sub> SO <sub>2</sub> ) <sub>2</sub> ] | [2] | Training | 313.15 | 0.6839 | -0.3799 | 3.7810 | 3.3234 | -0.6906 | -0.6910 | -8.6253  | -7.6092 | -50.0718 | -52.0438 |
| [C <sub>4</sub> C <sub>1</sub> im][N(CF <sub>3</sub> SO <sub>2</sub> ) <sub>2</sub> ] | [2] | Training | 318.15 | 0.7955 | -0.2288 | 3.8240 | 3.3688 | -0.6753 | -0.6756 | -8.5795  | -7.5631 | -50.0718 | -52.0438 |
| [C <sub>4</sub> C <sub>1</sub> im][N(CF <sub>3</sub> SO <sub>2</sub> ) <sub>2</sub> ] | [2] | Training | 328.15 | 1.0750 | 0.0723  | 3.9084 | 3.4580 | -0.6443 | -0.6446 | -8.4854  | -7.4689 | -50.0718 | -52.0438 |
| [C <sub>4</sub> C <sub>1</sub> im][N(CF <sub>3</sub> SO <sub>2</sub> ) <sub>2</sub> ] | [2] | Training | 333.15 | 1.2420 | 0.2167  | 3.9498 | 3.5018 | -0.6287 | -0.6289 | -8.4372  | -7.4210 | -50.0718 | -52.0438 |
| [C <sub>4</sub> C <sub>1</sub> im][N(CF <sub>3</sub> SO <sub>2</sub> ) <sub>2</sub> ] | [2] | Training | 353.15 | 1.9770 | 0.6816  | 4.1100 | 3.6721 | -0.5660 | -0.5661 | -8.2380  | -7.2244 | -50.0718 | -52.0438 |
| [C <sub>4</sub> C <sub>1</sub> im][N(CF <sub>3</sub> SO <sub>2</sub> ) <sub>2</sub> ] | [2] | Training | 273.15 | 0.1180 | -2.1371 | 3.4177 | 2.9425 | -0.8087 | -0.8098 | -8.9542  | -7.9471 | -50.0718 | -52.0438 |
| [C <sub>4</sub> C <sub>1</sub> im][N(CF <sub>3</sub> SO <sub>2</sub> ) <sub>2</sub> ] | [2] | Training | 288.15 | 0.2590 | -1.3509 | 3.5579 | 3.0891 | -0.7653 | -0.7661 | -8.8394  | -7.8275 | -50.0718 | -52.0438 |
| [C <sub>4</sub> C <sub>1</sub> im][N(CF <sub>3</sub> SO <sub>2</sub> ) <sub>2</sub> ] | [2] | Training | 293.15 | 0.3230 | -1.1301 | 3.6036 | 3.1370 | -0.7506 | -0.7513 | -8.7988  | -7.7856 | -50.0718 | -52.0438 |
| [C <sub>6</sub> C <sub>1</sub> im][N(CF <sub>3</sub> SO <sub>2</sub> ) <sub>2</sub> ] | [2] | Training | 278.15 | 0.0776 | -2.5562 | 3.8926 | 3.0208 | -0.7763 | -0.7762 | -10.9313 | -7.9313 | -50.1150 | -52.0438 |

|                                                                                       |     |          |        |        |         |        |        |         |         |          |         |          |          |
|---------------------------------------------------------------------------------------|-----|----------|--------|--------|---------|--------|--------|---------|---------|----------|---------|----------|----------|
| [C <sub>6</sub> C <sub>1</sub> im][N(CF <sub>3</sub> SO <sub>2</sub> ) <sub>2</sub> ] | [2] | Training | 288.15 | 0.1359 | -1.9958 | 3.9961 | 3.1173 | -0.7464 | -0.7461 | -10.8343 | -7.8506 | -50.1150 | -52.0438 |
| [C <sub>6</sub> C <sub>1</sub> im][N(CF <sub>3</sub> SO <sub>2</sub> ) <sub>2</sub> ] | [2] | Training | 298.15 | 0.2178 | -1.5242 | 4.0968 | 3.2114 | -0.7161 | -0.7157 | -10.7316 | -7.7659 | -50.1150 | -52.0438 |
| [C <sub>6</sub> C <sub>1</sub> im][N(CF <sub>3</sub> SO <sub>2</sub> ) <sub>2</sub> ] | [2] | Training | 308.15 | 0.3275 | -1.1163 | 4.1948 | 3.3033 | -0.6855 | -0.6850 | -10.6236 | -7.6777 | -50.1150 | -52.0438 |
| [C <sub>6</sub> C <sub>1</sub> im][N(CF <sub>3</sub> SO <sub>2</sub> ) <sub>2</sub> ] | [2] | Training | 318.15 | 0.4660 | -0.7636 | 4.2899 | 3.3930 | -0.6545 | -0.6540 | -10.5109 | -7.5864 | -50.1150 | -52.0438 |
| [C <sub>6</sub> C <sub>1</sub> im][N(CF <sub>3</sub> SO <sub>2</sub> ) <sub>2</sub> ] | [2] | Training | 328.15 | 0.6340 | -0.4557 | 4.3823 | 3.4804 | -0.6233 | -0.6227 | -10.3941 | -7.4923 | -50.1150 | -52.0438 |
| [C <sub>6</sub> C <sub>1</sub> im][N(CF <sub>3</sub> SO <sub>2</sub> ) <sub>2</sub> ] | [2] | Training | 338.15 | 0.8300 | -0.1863 | 4.4719 | 3.5656 | -0.5919 | -0.5913 | -10.2736 | -7.3959 | -50.1150 | -52.0438 |
| [C <sub>6</sub> C <sub>1</sub> im][N(CF <sub>3</sub> SO <sub>2</sub> ) <sub>2</sub> ] | [2] | Training | 348.15 | 1.0540 | 0.0526  | 4.5589 | 3.6486 | -0.5606 | -0.5599 | -10.1500 | -7.2976 | -50.1150 | -52.0438 |
| [C <sub>6</sub> C <sub>1</sub> im][N(CF <sub>3</sub> SO <sub>2</sub> ) <sub>2</sub> ] | [2] | Training | 368.15 | 1.5790 | 0.4568  | 4.7250 | 3.8083 | -0.4986 | -0.4980 | -9.8960  | -7.0970 | -50.1150 | -52.0438 |
| [C <sub>6</sub> C <sub>1</sub> im][N(CF <sub>3</sub> SO <sub>2</sub> ) <sub>2</sub> ] | [2] | Training | 378.15 | 1.8750 | 0.6286  | 4.8042 | 3.8850 | -0.4685 | -0.4678 | -9.7665  | -6.9955 | -50.1150 | -52.0438 |
| [C <sub>6</sub> C <sub>1</sub> im][N(CF <sub>3</sub> SO <sub>2</sub> ) <sub>2</sub> ] | [2] | Training | 388.15 | 2.1920 | 0.7848  | 4.8809 | 3.9597 | -0.4391 | -0.4385 | -9.6361  | -6.8936 | -50.1150 | -52.0438 |
| [C <sub>6</sub> C <sub>1</sub> im][N(CF <sub>3</sub> SO <sub>2</sub> ) <sub>2</sub> ] | [2] | Training | 398.15 | 2.5260 | 0.9266  | 4.9553 | 4.0325 | -0.4107 | -0.4101 | -9.5051  | -6.7917 | -50.1150 | -52.0438 |
| [C <sub>6</sub> C <sub>1</sub> im][N(CF <sub>3</sub> SO <sub>2</sub> ) <sub>2</sub> ] | [2] | Training | 293.15 | 0.1700 | -1.7720 | 4.0468 | 3.1646 | -0.7313 | -0.7310 | -10.7837 | -7.8087 | -50.1150 | -52.0438 |
| [C <sub>6</sub> C <sub>1</sub> im][N(CF <sub>3</sub> SO <sub>2</sub> ) <sub>2</sub> ] | [2] | Training | 303.15 | 0.2700 | -1.3093 | 4.1461 | 3.2576 | -0.7008 | -0.7004 | -10.6782 | -7.7223 | -50.1150 | -52.0438 |
| [C <sub>6</sub> C <sub>1</sub> im][N(CF <sub>3</sub> SO <sub>2</sub> ) <sub>2</sub> ] | [2] | Training | 313.15 | 0.3900 | -0.9416 | 4.2427 | 3.3484 | -0.6700 | -0.6695 | -10.5678 | -7.6324 | -50.1150 | -52.0438 |
| [C <sub>6</sub> C <sub>1</sub> im][N(CF <sub>3</sub> SO <sub>2</sub> ) <sub>2</sub> ] | [2] | Training | 333.15 | 0.7200 | -0.3285 | 4.4275 | 3.5233 | -0.6076 | -0.6070 | -10.3342 | -7.4443 | -50.1150 | -52.0438 |
| [C <sub>6</sub> C <sub>1</sub> im][N(CF <sub>3</sub> SO <sub>2</sub> ) <sub>2</sub> ] | [2] | Training | 353.15 | 1.2000 | 0.1823  | 4.6014 | 3.6893 | -0.5450 | -0.5443 | -10.0873 | -7.2479 | -50.1150 | -52.0438 |
| [C <sub>6</sub> C <sub>1</sub> im][N(CF <sub>3</sub> SO <sub>2</sub> ) <sub>2</sub> ] | [2] | Training | 283.15 | 0.1020 | -2.2828 | 3.9447 | 3.0693 | -0.7614 | -0.7612 | -10.8836 | -7.8915 | -50.1150 | -52.0438 |
| [C <sub>2</sub> C <sub>1</sub> im][B(CN) <sub>4</sub> ]                               | [2] | Training | 278.15 | 0.7020 | -0.3538 | 3.4065 | 2.5715 | -1.2494 | -1.2461 | -7.9250  | -8.4625 | -50.6750 | -49.0681 |
| [C <sub>2</sub> C <sub>1</sub> im][B(CN) <sub>4</sub> ]                               | [2] | Training | 283.15 | 0.8840 | -0.1233 | 3.4481 | 2.6096 | -1.2257 | -1.2224 | -7.8875  | -8.4275 | -50.6750 | -49.0681 |
| [C <sub>2</sub> C <sub>1</sub> im][B(CN) <sub>4</sub> ]                               | [2] | Training | 288.15 | 1.0880 | 0.0843  | 3.4894 | 2.6477 | -1.2019 | -1.1987 | -7.8491  | -8.3912 | -50.6750 | -49.0681 |
| [C <sub>2</sub> C <sub>1</sub> im][B(CN) <sub>4</sub> ]                               | [2] | Training | 298.15 | 1.5560 | 0.4421  | 3.5706 | 2.7234 | -1.1540 | -1.1510 | -7.7698  | -8.3153 | -50.6750 | -49.0681 |
| [C <sub>2</sub> C <sub>1</sub> im][B(CN) <sub>4</sub> ]                               | [2] | Training | 303.15 | 1.8080 | 0.5922  | 3.6107 | 2.7612 | -1.1299 | -1.1270 | -7.7289  | -8.2756 | -50.6750 | -49.0681 |
| [C <sub>2</sub> C <sub>1</sub> im][B(CN) <sub>4</sub> ]                               | [2] | Training | 313.15 | 2.3790 | 0.8667  | 3.6897 | 2.8362 | -1.0814 | -1.0786 | -7.6448  | -8.1933 | -50.6750 | -49.0681 |
| [C <sub>2</sub> C <sub>1</sub> im][B(CN) <sub>4</sub> ]                               | [2] | Training | 323.15 | 3.0120 | 1.1026  | 3.7671 | 2.9108 | -1.0326 | -1.0299 | -7.5579  | -8.1071 | -50.6750 | -49.0681 |
| [C <sub>2</sub> C <sub>1</sub> im][B(CN) <sub>4</sub> ]                               | [2] | Training | 333.15 | 3.6940 | 1.3067  | 3.8430 | 2.9848 | -0.9834 | -0.9809 | -7.4687  | -8.0177 | -50.6750 | -49.0681 |
| [C <sub>2</sub> C <sub>1</sub> im][B(CN) <sub>4</sub> ]                               | [2] | Training | 343.15 | 4.4120 | 1.4843  | 3.9172 | 3.0581 | -0.9342 | -0.9318 | -7.3775  | -7.9253 | -50.6750 | -49.0681 |
| [C <sub>2</sub> C <sub>1</sub> im][B(CN) <sub>4</sub> ]                               | [2] | Training | 353.15 | 5.1000 | 1.6292  | 3.9899 | 3.1308 | -0.8851 | -0.8829 | -7.2846  | -7.8305 | -50.6750 | -49.0681 |
| [C <sub>8</sub> C <sub>1</sub> im][BF <sub>4</sub> ]                                  | [2] | Training | 298.15 | 0.0587 | -2.8353 | 5.5598 | 1.9144 | -1.3489 | -1.3492 | -13.3892 | -3.4725 | -50.2776 | -62.9105 |
| [C <sub>8</sub> C <sub>1</sub> im][BF <sub>4</sub> ]                                  | [2] | Training | 348.15 | 0.4860 | -0.7215 | 6.1801 | 2.1679 | -1.1039 | -1.1035 | -12.6341 | -3.2767 | -50.2776 | -62.9105 |
| [C <sub>8</sub> C <sub>1</sub> im][BF <sub>4</sub> ]                                  | [2] | Training | 308.15 | 0.1012 | -2.2907 | 5.6901 | 1.9652 | -1.3041 | -1.3043 | -13.2482 | -3.4361 | -50.2776 | -62.9105 |
| [C <sub>8</sub> C <sub>1</sub> im][BF <sub>4</sub> ]                                  | [2] | Training | 318.15 | 0.1647 | -1.8036 | 5.8173 | 2.0159 | -1.2570 | -1.2570 | -13.1014 | -3.3981 | -50.2776 | -62.9105 |
| [C <sub>8</sub> C <sub>1</sub> im][BF <sub>4</sub> ]                                  | [2] | Training | 328.15 | 0.2520 | -1.3783 | 5.9414 | 2.0666 | -1.2077 | -1.2076 | -12.9497 | -3.3587 | -50.2776 | -62.9105 |
| [C <sub>8</sub> C <sub>1</sub> im][BF <sub>4</sub> ]                                  | [2] | Training | 338.15 | 0.3680 | -0.9997 | 6.0624 | 2.1173 | -1.1566 | -1.1562 | -12.7937 | -3.3182 | -50.2776 | -62.9105 |

|                                                                                       |     |          |        |        |         |        |        |         |         |          |          |          |          |
|---------------------------------------------------------------------------------------|-----|----------|--------|--------|---------|--------|--------|---------|---------|----------|----------|----------|----------|
| [C <sub>8</sub> C <sub>1</sub> im][BF <sub>4</sub> ]                                  | [2] | Training | 358.15 | 0.6880 | -0.3740 | 6.2946 | 2.2185 | -1.0502 | -1.0496 | -12.4718 | -3.2344  | -50.2776 | -62.9105 |
| [C <sub>2</sub> C <sub>1</sub> im][C(CN) <sub>3</sub> ]                               | [2] | Training | 298.00 | 0.7600 | -0.2744 | 4.1115 | 2.2590 | -1.7579 | -1.7536 | -7.7816  | -6.4099  | -50.6750 | -53.5982 |
| [C <sub>2</sub> C <sub>1</sub> im][C(CN) <sub>3</sub> ]                               | [2] | Training | 313.00 | 1.2500 | 0.2231  | 4.2426 | 2.3603 | -1.6568 | -1.6526 | -7.6618  | -6.3273  | -50.6750 | -53.5982 |
| [C <sub>4</sub> C <sub>1</sub> im][CF <sub>3</sub> SO <sub>3</sub> ]                  | [2] | Training | 268.15 | 0.0539 | -2.9206 | 4.2538 | 2.0489 | -1.8747 | -1.8731 | -9.3551  | -5.1213  | -50.0718 | -60.9237 |
| [C <sub>4</sub> C <sub>1</sub> im][CF <sub>3</sub> SO <sub>3</sub> ]                  | [2] | Training | 288.15 | 0.1808 | -1.7104 | 4.4701 | 2.1896 | -1.7584 | -1.7565 | -9.1971  | -5.0306  | -50.0718 | -60.9237 |
| [C <sub>4</sub> C <sub>1</sub> im][CF <sub>3</sub> SO <sub>3</sub> ]                  | [2] | Training | 298.15 | 0.2900 | -1.2379 | 4.5758 | 2.2598 | -1.6966 | -1.6945 | -9.1104  | -4.9808  | -50.0718 | -60.9237 |
| [C <sub>4</sub> C <sub>1</sub> im][CF <sub>3</sub> SO <sub>3</sub> ]                  | [2] | Training | 308.15 | 0.4360 | -0.8301 | 4.6798 | 2.3298 | -1.6323 | -1.6302 | -9.0192  | -4.9284  | -50.0718 | -60.9237 |
| [C <sub>4</sub> C <sub>1</sub> im][CF <sub>3</sub> SO <sub>3</sub> ]                  | [2] | Training | 318.15 | 0.6210 | -0.4764 | 4.7820 | 2.3994 | -1.5659 | -1.5637 | -8.9238  | -4.8736  | -50.0718 | -60.9237 |
| [C <sub>4</sub> C <sub>1</sub> im][CF <sub>3</sub> SO <sub>3</sub> ]                  | [2] | Training | 348.15 | 1.4260 | 0.3549  | 5.0760 | 2.6051 | -1.3567 | -1.3545 | -8.6183  | -4.6981  | -50.0718 | -60.9237 |
| [C <sub>4</sub> C <sub>1</sub> im][CF <sub>3</sub> SO <sub>3</sub> ]                  | [2] | Training | 358.15 | 1.7750 | 0.5738  | 5.1696 | 2.6723 | -1.2853 | -1.2831 | -8.5115  | -4.6368  | -50.0718 | -60.9237 |
| [C <sub>4</sub> C <sub>1</sub> im][CF <sub>3</sub> SO <sub>3</sub> ]                  | [2] | Training | 368.15 | 2.1600 | 0.7701  | 5.2610 | 2.7388 | -1.2141 | -1.2120 | -8.4030  | -4.5745  | -50.0718 | -60.9237 |
| [C <sub>4</sub> C <sub>1</sub> im][CF <sub>3</sub> SO <sub>3</sub> ]                  | [2] | Training | 293.15 | 0.2300 | -1.4697 | 4.5232 | 2.2248 | -1.7278 | -1.7258 | -9.1543  | -5.0061  | -50.0718 | -60.9237 |
| [C <sub>4</sub> C <sub>1</sub> im][CF <sub>3</sub> SO <sub>3</sub> ]                  | [2] | Training | 313.15 | 0.5200 | -0.6539 | 4.7311 | 2.3647 | -1.5994 | -1.5972 | -8.9720  | -4.9013  | -50.0718 | -60.9237 |
| [C <sub>4</sub> C <sub>1</sub> im][CF <sub>3</sub> SO <sub>3</sub> ]                  | [2] | Training | 333.15 | 0.9400 | -0.0619 | 4.9314 | 2.5029 | -1.4627 | -1.4605 | -8.7743  | -4.7877  | -50.0718 | -60.9237 |
| [C <sub>4</sub> C <sub>1</sub> im][CF <sub>3</sub> SO <sub>3</sub> ]                  | [2] | Training | 353.15 | 1.6000 | 0.4700  | 5.1231 | 2.6388 | -1.3210 | -1.3188 | -8.5651  | -4.6676  | -50.0718 | -60.9237 |
| [C <sub>8</sub> C <sub>1</sub> im][PF <sub>6</sub> ]                                  | [2] | Training | 283.15 | 0.0081 | -4.8196 | 4.7573 | 1.9284 | -0.3996 | -0.4036 | -13.1300 | -4.2909  | -50.2776 | -56.5914 |
| [C <sub>8</sub> C <sub>1</sub> im][PF <sub>6</sub> ]                                  | [2] | Training | 288.15 | 0.0121 | -4.4129 | 4.8148 | 1.9606 | -0.3941 | -0.3979 | -13.0696 | -4.2709  | -50.2776 | -56.5914 |
| [C <sub>8</sub> C <sub>1</sub> im][PF <sub>6</sub> ]                                  | [2] | Training | 298.15 | 0.0252 | -3.6809 | 4.9272 | 2.0251 | -0.3825 | -0.3860 | -12.9438 | -4.2293  | -50.2776 | -56.5914 |
| [C <sub>8</sub> C <sub>1</sub> im][PF <sub>6</sub> ]                                  | [2] | Training | 303.15 | 0.0353 | -3.3439 | 4.9822 | 2.0574 | -0.3765 | -0.3798 | -12.8785 | -4.2077  | -50.2776 | -56.5914 |
| [C <sub>8</sub> C <sub>1</sub> im][PF <sub>6</sub> ]                                  | [2] | Training | 308.15 | 0.0479 | -3.0386 | 5.0365 | 2.0896 | -0.3704 | -0.3734 | -12.8117 | -4.1856  | -50.2776 | -56.5914 |
| [C <sub>8</sub> C <sub>1</sub> im][PF <sub>6</sub> ]                                  | [2] | Training | 313.15 | 0.0653 | -2.7288 | 5.0899 | 2.1219 | -0.3641 | -0.3669 | -12.7435 | -4.1629  | -50.2776 | -56.5914 |
| [C <sub>8</sub> C <sub>1</sub> im][PF <sub>6</sub> ]                                  | [2] | Training | 318.15 | 0.0858 | -2.4557 | 5.1426 | 2.1542 | -0.3576 | -0.3603 | -12.6740 | -4.1399  | -50.2776 | -56.5914 |
| [C <sub>8</sub> C <sub>1</sub> im][PF <sub>6</sub> ]                                  | [2] | Training | 323.15 | 0.1108 | -2.2000 | 5.1946 | 2.1864 | -0.3510 | -0.3535 | -12.6032 | -4.1164  | -50.2776 | -56.5914 |
| [C <sub>8</sub> C <sub>1</sub> im][N(CF <sub>3</sub> SO <sub>2</sub> ) <sub>2</sub> ] | [2] | Training | 293.15 | 0.1000 | -2.3026 | 4.4377 | 3.1950 | -0.7158 | -0.7169 | -12.7935 | -7.8273  | -50.2776 | -52.0438 |
| [C <sub>8</sub> C <sub>1</sub> im][N(CF <sub>3</sub> SO <sub>2</sub> ) <sub>2</sub> ] | [2] | Training | 298.15 | 0.1300 | -2.0402 | 4.4918 | 3.2412 | -0.7003 | -0.7012 | -12.7311 | -7.7845  | -50.2776 | -52.0438 |
| [C <sub>8</sub> C <sub>1</sub> im][N(CF <sub>3</sub> SO <sub>2</sub> ) <sub>2</sub> ] | [2] | Training | 303.15 | 0.1600 | -1.8326 | 4.5450 | 3.2868 | -0.6847 | -0.6855 | -12.6672 | -7.7409  | -50.2776 | -52.0438 |
| [C <sub>8</sub> C <sub>1</sub> im][N(CF <sub>3</sub> SO <sub>2</sub> ) <sub>2</sub> ] | [2] | Training | 313.15 | 0.2400 | -1.4271 | 4.6490 | 3.3761 | -0.6533 | -0.6540 | -12.5351 | -7.6512  | -50.2776 | -52.0438 |
| [C <sub>8</sub> C <sub>1</sub> im][N(CF <sub>3</sub> SO <sub>2</sub> ) <sub>2</sub> ] | [2] | Training | 333.15 | 0.4700 | -0.7550 | 4.8470 | 3.5476 | -0.5902 | -0.5906 | -12.2557 | -7.4634  | -50.2776 | -52.0438 |
| [C <sub>8</sub> C <sub>1</sub> im][N(CF <sub>3</sub> SO <sub>2</sub> ) <sub>2</sub> ] | [2] | Training | 353.15 | 0.8000 | -0.2231 | 5.0322 | 3.7097 | -0.5274 | -0.5276 | -11.9605 | -7.2671  | -50.2776 | -52.0438 |
| [C <sub>4</sub> C <sub>1</sub> im][BF <sub>4</sub> ]                                  | [2] | Test     | 308.20 | 0.3640 | -1.0106 | 5.1338 | 1.4579 | -1.3965 | -1.3964 | -9.1840  | -3.4137  | -50.0718 | -62.9105 |
| [C <sub>6</sub> C <sub>1</sub> im][BF <sub>4</sub> ]                                  | [2] | Test     | 308.15 | 0.2070 | -1.5750 | 5.3925 | 1.7316 | -1.3461 | -1.3445 | -11.2070 | -3.4261  | -50.1150 | -62.9105 |
| [C <sub>4</sub> C <sub>1</sub> im][CH <sub>3</sub> CO <sub>2</sub> ]                  | [2] | Test     | 358.15 | 0.7360 | -0.3065 | 8.5041 | 4.2146 | -3.8675 | -3.8518 | -9.3077  | -3.8594  | -50.0718 | -79.6259 |
| [C <sub>2</sub> C <sub>1</sub> im][C <sub>8</sub> H <sub>17</sub> SO <sub>4</sub> ]   | [2] | Test     | 293.10 | 0.0340 | -3.3814 | 4.2105 | 5.0675 | -2.3399 | -2.3355 | -7.7890  | -12.5172 | -50.6750 | -72.5310 |

|                                                                                                     |     |      |        |        |         |        |        |         |         |          |         |          |          |
|-----------------------------------------------------------------------------------------------------|-----|------|--------|--------|---------|--------|--------|---------|---------|----------|---------|----------|----------|
| [C <sub>4</sub> C <sub>1</sub> im][CF <sub>3</sub> CO <sub>2</sub> ]                                | [2] | Test | 298.15 | 0.4550 | -0.7875 | 5.2761 | 2.3257 | -2.8555 | -2.8441 | -9.1882  | -4.2060 | -50.0718 | -64.7784 |
| [C <sub>4</sub> C <sub>1</sub> im][CF <sub>3</sub> CO <sub>2</sub> ]                                | [2] | Test | 303.15 | 0.5470 | -0.6033 | 5.3325 | 2.3582 | -2.7983 | -2.7871 | -9.1424  | -4.1848 | -50.0718 | -64.7784 |
| [C <sub>4</sub> C <sub>1</sub> im][CF <sub>3</sub> CO <sub>2</sub> ]                                | [2] | Test | 318.15 | 0.9200 | -0.0834 | 5.4999 | 2.4560 | -2.6203 | -2.6096 | -8.9989  | -4.1182 | -50.0718 | -64.7784 |
| [C <sub>4</sub> C <sub>1</sub> im][CF <sub>3</sub> CO <sub>2</sub> ]                                | [2] | Test | 323.15 | 1.0500 | 0.0488  | 5.5550 | 2.4887 | -2.5592 | -2.5486 | -8.9491  | -4.0950 | -50.0718 | -64.7784 |
| [C <sub>4</sub> C <sub>1</sub> im][CF <sub>3</sub> CO <sub>2</sub> ]                                | [2] | Test | 333.15 | 1.3800 | 0.3221  | 5.6641 | 2.5539 | -2.4347 | -2.4246 | -8.8471  | -4.0475 | -50.0718 | -64.7784 |
| [C <sub>2</sub> C <sub>1</sub> im][CH <sub>3</sub> SO <sub>3</sub> ]                                | [2] | Test | 288.15 | 0.1420 | -1.9519 | 6.9101 | 3.7139 | -3.5055 | -3.5291 | -7.9107  | -4.8753 | -50.6750 | -76.8542 |
| [C <sub>2</sub> C <sub>1</sub> im][CH <sub>3</sub> SO <sub>3</sub> ]                                | [2] | Test | 283.15 | 0.0988 | -2.3147 | 6.8647 | 3.6885 | -3.5523 | -3.5761 | -7.9487  | -4.8986 | -50.6750 | -76.8542 |
| [C <sub>2</sub> C <sub>1</sub> im][(C <sub>2</sub> F <sub>5</sub> ) <sub>3</sub> PF <sub>3</sub> ]  | [2] | Test | 298.15 | 0.5390 | -0.6180 | 2.6644 | 4.7464 | -0.1231 | -0.1236 | -6.2459  | -9.3451 | -50.6750 | -41.7902 |
| [C <sub>2</sub> C <sub>1</sub> im][(C <sub>2</sub> F <sub>5</sub> ) <sub>3</sub> PF <sub>3</sub> ]  | [2] | Test | 328.15 | 1.3180 | 0.2761  | 2.8605 | 4.8983 | -0.1054 | -0.1057 | -6.0728  | -9.0537 | -50.6750 | -41.7902 |
| [C <sub>6</sub> C <sub>1</sub> im][(C <sub>2</sub> F <sub>5</sub> ) <sub>3</sub> PF <sub>3</sub> ]  | [2] | Test | 293.15 | 0.1303 | -2.0379 | 3.6212 | 4.2907 | -0.1158 | -0.1161 | -10.1828 | -9.4975 | -50.1150 | -41.7902 |
| [C <sub>6</sub> C <sub>1</sub> im][(C <sub>2</sub> F <sub>5</sub> ) <sub>3</sub> PF <sub>3</sub> ]  | [2] | Test | 323.15 | 0.4400 | -0.8210 | 3.8343 | 4.4317 | -0.0981 | -0.0983 | -9.8873  | -9.2051 | -50.1150 | -41.7902 |
| [C <sub>2</sub> C <sub>1</sub> im][C <sub>2</sub> H <sub>5</sub> SO <sub>4</sub> ]                  | [2] | Test | 308.10 | 0.6100 | -0.4943 | 5.3790 | 3.4457 | -2.3485 | -2.3439 | -7.6713  | -6.2753 | -50.6750 | -72.0671 |
| [C <sub>2</sub> C <sub>1</sub> im][C <sub>2</sub> H <sub>5</sub> SO <sub>4</sub> ]                  | [2] | Test | 308.15 | 0.5660 | -0.5692 | 5.3795 | 3.4460 | -2.3481 | -2.3435 | -7.6709  | -6.2750 | -50.6750 | -72.0671 |
| [C <sub>4</sub> C <sub>1</sub> im][N(C <sub>2</sub> F <sub>5</sub> SO <sub>2</sub> ) <sub>2</sub> ] | [2] | Test | 368.15 | 1.2930 | 0.2570  | 4.0583 | 4.5124 | -0.4002 | -0.4006 | -7.8658  | -8.6744 | -50.0718 | -50.3323 |
| [C <sub>4</sub> C <sub>1</sub> im][N(C <sub>2</sub> F <sub>5</sub> SO <sub>2</sub> ) <sub>2</sub> ] | [2] | Test | 328.15 | 0.4747 | -0.7451 | 3.7660 | 4.1571 | -0.5019 | -0.5027 | -8.2596  | -9.1565 | -50.0718 | -50.3323 |
| [C <sub>4</sub> C <sub>1</sub> im][N(C <sub>2</sub> F <sub>5</sub> SO <sub>2</sub> ) <sub>2</sub> ] | [2] | Test | 313.15 | 0.2780 | -1.2801 | 3.6474 | 4.0119 | -0.5404 | -0.5415 | -8.3971  | -9.3279 | -50.0718 | -50.3323 |
| [C <sub>4</sub> C <sub>1</sub> im][N(C <sub>2</sub> F <sub>5</sub> SO <sub>2</sub> ) <sub>2</sub> ] | [2] | Test | 293.15 | 0.1122 | -2.1875 | 3.4816 | 3.8077 | -0.5913 | -0.5928 | -8.5681  | -9.5440 | -50.0718 | -50.3323 |
| [C <sub>6</sub> C <sub>1</sub> im][PF <sub>6</sub> ]                                                | [2] | Test | 283.15 | 0.0184 | -3.9981 | 4.3211 | 1.7157 | -0.4157 | -0.4193 | -11.0293 | -4.2722 | -50.1150 | -56.5914 |
| [C <sub>6</sub> C <sub>1</sub> im][PF <sub>6</sub> ]                                                | [2] | Test | 298.15 | 0.0519 | -2.9584 | 4.4769 | 1.8112 | -0.3992 | -0.4022 | -10.8737 | -4.2109 | -50.1150 | -56.5914 |
| [C <sub>6</sub> C <sub>1</sub> im][PF <sub>6</sub> ]                                                | [2] | Test | 343.15 | 0.4510 | -0.7963 | 4.9112 | 2.1029 | -0.3402 | -0.3419 | -10.3435 | -4.0012 | -50.1150 | -56.5914 |
| [C <sub>6</sub> C <sub>1</sub> im][PF <sub>6</sub> ]                                                | [2] | Test | 323.15 | 0.2120 | -1.5512 | 4.7242 | 1.9727 | -0.3681 | -0.3703 | -10.5890 | -4.0984 | -50.1150 | -56.5914 |
| [C <sub>3</sub> C <sub>1</sub> im][SCN]                                                             | [2] | Test | 288.15 | 0.2550 | -1.3665 | 5.5800 | 1.5742 | -2.1873 | -2.1786 | -9.7624  | -4.7217 | -50.1735 | -64.8886 |
| [C <sub>4</sub> C <sub>1</sub> im][N(CF <sub>3</sub> SO <sub>2</sub> ) <sub>2</sub> ]               | [2] | Test | 283.15 | 0.2070 | -1.5750 | 3.5117 | 3.0408 | -0.7799 | -0.7808 | -8.8789  | -7.8684 | -50.0718 | -52.0438 |
| [C <sub>4</sub> C <sub>1</sub> im][N(CF <sub>3</sub> SO <sub>2</sub> ) <sub>2</sub> ]               | [2] | Test | 311.15 | 0.6429 | -0.4418 | 3.7636 | 3.3052 | -0.6967 | -0.6971 | -8.6434  | -7.6274 | -50.0718 | -52.0438 |
| [C <sub>4</sub> C <sub>1</sub> im][N(CF <sub>3</sub> SO <sub>2</sub> ) <sub>2</sub> ]               | [2] | Test | 278.15 | 0.1580 | -1.8452 | 3.4649 | 2.9919 | -0.7943 | -0.7954 | -8.9172  | -7.9083 | -50.0718 | -52.0438 |
| [C <sub>2</sub> C <sub>1</sub> im][B(CN) <sub>4</sub> ]                                             | [2] | Test | 273.15 | 0.5450 | -0.6070 | 3.3646 | 2.5332 | -1.2730 | -1.2697 | -7.9615  | -8.4962 | -50.6750 | -49.0681 |
| [C <sub>2</sub> C <sub>1</sub> im][B(CN) <sub>4</sub> ]                                             | [2] | Test | 293.15 | 1.3110 | 0.2708  | 3.5302 | 2.6856 | -1.1780 | -1.1749 | -7.8099  | -8.3538 | -50.6750 | -49.0681 |
| [C <sub>8</sub> C <sub>1</sub> im][BF <sub>4</sub> ]                                                | [2] | Test | 323.15 | 0.2030 | -1.5945 | 5.8798 | 2.0413 | -1.2327 | -1.2325 | -13.0261 | -3.3786 | -50.2776 | -62.9105 |
| [C <sub>8</sub> C <sub>1</sub> im][BF <sub>4</sub> ]                                                | [2] | Test | 288.15 | 0.0304 | -3.4933 | 5.4266 | 1.8635 | -1.3911 | -1.3917 | -13.5239 | -3.5072 | -50.2776 | -62.9105 |
| [C <sub>2</sub> C <sub>1</sub> im][C(CN) <sub>3</sub> ]                                             | [2] | Test | 303.00 | 0.9300 | -0.0726 | 4.1556 | 2.2929 | -1.7247 | -1.7204 | -7.7425  | -6.3831 | -50.6750 | -53.5982 |
| [C <sub>4</sub> C <sub>1</sub> im][CF <sub>3</sub> SO <sub>3</sub> ]                                | [2] | Test | 278.15 | 0.1038 | -2.2653 | 4.3627 | 2.1193 | -1.8178 | -1.8160 | -9.2788  | -5.0775 | -50.0718 | -60.9237 |
| [C <sub>4</sub> C <sub>1</sub> im][CF <sub>3</sub> SO <sub>3</sub> ]                                | [2] | Test | 328.15 | 0.8480 | -0.1649 | 4.8821 | 2.4685 | -1.4975 | -1.4953 | -8.8249  | -4.8168 | -50.0718 | -60.9237 |
| [C <sub>4</sub> C <sub>1</sub> im][CF <sub>3</sub> SO <sub>3</sub> ]                                | [2] | Test | 338.15 | 1.1170 | 0.1106  | 4.9801 | 2.5371 | -1.4276 | -1.4254 | -8.7229  | -4.7582 | -50.0718 | -60.9237 |



|                                                                                       |      |      |        |        |         |        |        |         |         |          |         |          |          |
|---------------------------------------------------------------------------------------|------|------|--------|--------|---------|--------|--------|---------|---------|----------|---------|----------|----------|
| [C <sub>8</sub> C <sub>1</sub> im][PF <sub>6</sub> ]                                  | [2]  | Test | 293.15 | 0.0177 | -4.0342 | 4.8714 | 1.9928 | -0.3884 | -0.3920 | -13.0075 | -4.2504 | -50.2776 | -56.5914 |
| [C <sub>8</sub> C <sub>1</sub> im][PF <sub>6</sub> ]                                  | [2]  | Test | 348.15 | 0.2900 | -1.2379 | 5.4432 | 2.3464 | -0.3158 | -0.3177 | -12.2339 | -3.9936 | -50.2776 | -56.5914 |
| [C <sub>4</sub> C <sub>1</sub> im][CH <sub>3</sub> SO <sub>4</sub> ]                  | [97] | Test | 333.15 | 0.6230 | -0.4732 | 6.1318 | 3.1974 | -2.0100 | -2.0076 | -9.4037  | -5.0726 | -50.0718 | -71.0882 |
| [C <sub>4</sub> C <sub>1</sub> im][CH <sub>3</sub> SO <sub>4</sub> ]                  | [97] | Test | 343.15 | 0.8840 | -0.1233 | 6.2338 | 3.2533 | -1.9196 | -1.9171 | -9.2893  | -5.0098 | -50.0718 | -71.0882 |
| [C <sub>2</sub> C <sub>1</sub> im][CH <sub>3</sub> CO <sub>2</sub> ]                  | [98] | Test | 338.15 | 1.4770 | 0.3900  | 8.4374 | 3.9827 | -4.3854 | -4.3657 | -7.6077  | -3.9598 | -50.6750 | -79.6259 |
| [C <sub>2</sub> C <sub>1</sub> im][CH <sub>3</sub> CO <sub>2</sub> ]                  | [98] | Test | 348.15 | 1.9560 | 0.6709  | 8.5318 | 4.0385 | -4.1768 | -4.1580 | -7.5117  | -3.9108 | -50.6750 | -79.6259 |
| [C <sub>2</sub> C <sub>1</sub> im][CH <sub>3</sub> CO <sub>2</sub> ]                  | [98] | Test | 358.15 | 2.5030 | 0.9175  | 8.6256 | 4.0946 | -3.9637 | -3.9457 | -7.4140  | -3.8608 | -50.6750 | -79.6259 |
| [C <sub>3</sub> C <sub>1</sub> im][N(CF <sub>3</sub> SO <sub>2</sub> ) <sub>2</sub> ] | [99] | Test | 283.00 | 0.3210 | -1.1363 | 3.2567 | 3.0250 | -0.7892 | -0.7902 | -7.8878  | -7.8557 | -50.1735 | -52.0438 |
| [C <sub>3</sub> C <sub>1</sub> im][N(CF <sub>3</sub> SO <sub>2</sub> ) <sub>2</sub> ] | [99] | Test | 292.00 | 0.4770 | -0.7402 | 3.3345 | 3.1123 | -0.7633 | -0.7642 | -7.8247  | -7.7815 | -50.1735 | -52.0438 |
| [C <sub>3</sub> C <sub>1</sub> im][N(CF <sub>3</sub> SO <sub>2</sub> ) <sub>2</sub> ] | [99] | Test | 303.00 | 0.7100 | -0.3425 | 3.4276 | 3.2170 | -0.7311 | -0.7318 | -7.7432  | -7.6866 | -50.1735 | -52.0438 |
| [C <sub>3</sub> C <sub>1</sub> im][N(CF <sub>3</sub> SO <sub>2</sub> ) <sub>2</sub> ] | [99] | Test | 313.00 | 0.9710 | -0.0294 | 3.5103 | 3.3102 | -0.7013 | -0.7018 | -7.6652  | -7.5968 | -50.1735 | -52.0438 |
| [C <sub>3</sub> C <sub>1</sub> im][N(CF <sub>3</sub> SO <sub>2</sub> ) <sub>2</sub> ] | [99] | Test | 323.00 | 1.2520 | 0.2247  | 3.5913 | 3.4015 | -0.6708 | -0.6712 | -7.5839  | -7.5040 | -50.1735 | -52.0438 |

---

**Table S2.** Predicted ionic conductivity values using MLR and SVM regression algorithm

| Ionic Liquids                                                                       | Reference | Set      | $T/K$  | $\sigma_{exp}/S \cdot m^{-1}$ | $\ln \sigma_{exp}$ | MLR Algorithm       |                                |                 | SVM Regression Algorithm |                                |                 |
|-------------------------------------------------------------------------------------|-----------|----------|--------|-------------------------------|--------------------|---------------------|--------------------------------|-----------------|--------------------------|--------------------------------|-----------------|
|                                                                                     |           |          |        |                               |                    | $\ln \sigma_{pred}$ | $\sigma_{pred}/S \cdot m^{-1}$ | $ \% \Delta E $ | $\ln \sigma_{pred}$      | $\sigma_{pred}/S \cdot m^{-1}$ | $ \% \Delta E $ |
| [C <sub>4</sub> C <sub>1</sub> im][BF <sub>4</sub> ]                                | [2]       | Training | 313.20 | 0.4460                        | -0.8074            | -0.5514             | 0.5762                         | 29.18%          | -0.7116                  | 0.4909                         | 10.06%          |
| [C <sub>4</sub> C <sub>1</sub> im][BF <sub>4</sub> ]                                | [2]       | Training | 318.20 | 0.5420                        | -0.6125            | -0.3255             | 0.7221                         | 33.23%          | -0.5086                  | 0.6014                         | 10.95%          |
| [C <sub>4</sub> C <sub>1</sub> im][BF <sub>4</sub> ]                                | [2]       | Training | 323.20 | 0.6510                        | -0.4292            | -0.1054             | 0.8999                         | 38.24%          | -0.3221                  | 0.7247                         | 11.31%          |
| [C <sub>4</sub> C <sub>1</sub> im][BF <sub>4</sub> ]                                | [2]       | Training | 328.20 | 0.7830                        | -0.2446            | 0.1091              | 1.1153                         | 42.44%          | -0.1506                  | 0.8602                         | 9.86%           |
| [C <sub>6</sub> C <sub>1</sub> im][BF <sub>4</sub> ]                                | [2]       | Training | 288.15 | 0.0672                        | -2.7001            | -2.8629             | 0.0571                         | 15.03%          | -2.8307                  | 0.0590                         | 12.24%          |
| [C <sub>6</sub> C <sub>1</sub> im][BF <sub>4</sub> ]                                | [2]       | Training | 298.15 | 0.1229                        | -2.0964            | -2.3347             | 0.0968                         | 21.21%          | -2.1500                  | 0.1165                         | 5.22%           |
| [C <sub>6</sub> C <sub>1</sub> im][BF <sub>4</sub> ]                                | [2]       | Training | 318.15 | 0.3260                        | -1.1209            | -1.3565             | 0.2576                         | 20.99%          | -1.0932                  | 0.3351                         | 2.80%           |
| [C <sub>6</sub> C <sub>1</sub> im][BF <sub>4</sub> ]                                | [2]       | Training | 328.15 | 0.4830                        | -0.7277            | -0.9025             | 0.4056                         | 16.03%          | -0.6876                  | 0.5028                         | 4.09%           |
| [C <sub>6</sub> C <sub>1</sub> im][BF <sub>4</sub> ]                                | [2]       | Training | 338.15 | 0.6830                        | -0.3813            | -0.4695             | 0.6253                         | 8.45%           | -0.3461                  | 0.7075                         | 3.58%           |
| [C <sub>6</sub> C <sub>1</sub> im][BF <sub>4</sub> ]                                | [2]       | Training | 348.15 | 0.9260                        | -0.0769            | -0.0563             | 0.9452                         | 2.08%           | -0.0572                  | 0.9444                         | 1.98%           |
| [C <sub>6</sub> C <sub>1</sub> im][BF <sub>4</sub> ]                                | [2]       | Training | 358.15 | 1.2140                        | 0.1939             | 0.3384              | 1.4027                         | 15.54%          | 0.1883                   | 1.2073                         | 0.56%           |
| [C <sub>4</sub> C <sub>1</sub> im][CH <sub>3</sub> CO <sub>2</sub> ]                | [2]       | Training | 348.15 | 0.5360                        | -0.6236            | -0.6228             | 0.5364                         | 0.08%           | -0.5667                  | 0.5674                         | 5.85%           |
| [C <sub>4</sub> C <sub>1</sub> im][CH <sub>3</sub> CO <sub>2</sub> ]                | [2]       | Training | 338.15 | 0.3720                        | -0.9889            | -1.0076             | 0.3651                         | 1.85%           | -0.9423                  | 0.3897                         | 4.77%           |
| [C <sub>4</sub> C <sub>1</sub> im][CH <sub>3</sub> CO <sub>2</sub> ]                | [2]       | Training | 328.15 | 0.2470                        | -1.3984            | -1.4102             | 0.2441                         | 1.18%           | -1.3717                  | 0.2537                         | 2.71%           |
| [C <sub>4</sub> C <sub>1</sub> im][CH <sub>3</sub> CO <sub>2</sub> ]                | [2]       | Training | 318.15 | 0.1540                        | -1.8708            | -1.8322             | 0.1601                         | 3.94%           | -1.8650                  | 0.1549                         | 0.59%           |
| [C <sub>4</sub> C <sub>1</sub> im][CH <sub>3</sub> CO <sub>2</sub> ]                | [2]       | Training | 308.15 | 0.0830                        | -2.4889            | -2.2751             | 0.1028                         | 23.84%          | -2.4342                  | 0.0877                         | 5.62%           |
| [C <sub>4</sub> C <sub>1</sub> im][CH <sub>3</sub> CO <sub>2</sub> ]                | [2]       | Training | 298.15 | 0.0420                        | -3.1701            | -2.7409             | 0.0645                         | 53.60%          | -3.0929                  | 0.0454                         | 8.02%           |
| [C <sub>4</sub> C <sub>1</sub> im][CH <sub>3</sub> CO <sub>2</sub> ]                | [2]       | Training | 288.15 | 0.0190                        | -3.9633            | -3.2319             | 0.0395                         | 107.79%         | -3.8554                  | 0.0212                         | 11.40%          |
| [C <sub>4</sub> C <sub>1</sub> im][CH <sub>3</sub> CO <sub>2</sub> ]                | [2]       | Training | 323.15 | 0.2210                        | -1.5096            | -1.6187             | 0.1982                         | 10.34%          | -1.6096                  | 0.2000                         | 9.52%           |
| [C <sub>4</sub> C <sub>1</sub> im][CH <sub>3</sub> CO <sub>2</sub> ]                | [2]       | Training | 313.15 | 0.1310                        | -2.0326            | -2.0509             | 0.1286                         | 1.82%           | -2.1393                  | 0.1177                         | 10.12%          |
| [C <sub>4</sub> C <sub>1</sub> im][CH <sub>3</sub> CO <sub>2</sub> ]                | [2]       | Training | 303.15 | 0.0699                        | -2.6607            | -2.5050             | 0.0817                         | 16.85%          | -2.7515                  | 0.0638                         | 8.68%           |
| [C <sub>4</sub> C <sub>1</sub> im][CH <sub>3</sub> CO <sub>2</sub> ]                | [2]       | Training | 293.15 | 0.0331                        | -3.4082            | -2.9831             | 0.0506                         | 52.98%          | -3.4603                  | 0.0314                         | 5.07%           |
| [C <sub>4</sub> C <sub>1</sub> im][CH <sub>3</sub> CO <sub>2</sub> ]                | [2]       | Training | 283.15 | 0.0131                        | -4.3351            | -3.4877             | 0.0306                         | 133.36%         | -4.2799                  | 0.0138                         | 5.68%           |
| [C <sub>2</sub> C <sub>1</sub> im][C <sub>8</sub> H <sub>17</sub> SO <sub>4</sub> ] | [2]       | Training | 278.10 | 0.0120                        | -4.4228            | -3.1588             | 0.0425                         | 253.99%         | -4.3259                  | 0.0132                         | 10.18%          |
| [C <sub>2</sub> C <sub>1</sub> im][C <sub>8</sub> H <sub>17</sub> SO <sub>4</sub> ] | [2]       | Training | 283.10 | 0.0170                        | -4.0745            | -2.9662             | 0.0515                         | 202.93%         | -4.0211                  | 0.0179                         | 5.49%           |
| [C <sub>2</sub> C <sub>1</sub> im][C <sub>8</sub> H <sub>17</sub> SO <sub>4</sub> ] | [2]       | Training | 288.10 | 0.0250                        | -3.6889            | -2.7811             | 0.0620                         | 147.89%         | -3.7300                  | 0.0240                         | 4.03%           |
| [C <sub>2</sub> C <sub>1</sub> im][C <sub>8</sub> H <sub>17</sub> SO <sub>4</sub> ] | [2]       | Training | 298.10 | 0.0460                        | -3.0791            | -2.4313             | 0.0879                         | 91.13%          | -3.1863                  | 0.0413                         | 10.16%          |
| [C <sub>4</sub> C <sub>1</sub> im][CF <sub>3</sub> CO <sub>2</sub> ]                | [2]       | Training | 308.15 | 0.6570                        | -0.4201            | -1.3413             | 0.2615                         | 60.20%          | -0.5278                  | 0.5899                         | 10.21%          |
| [C <sub>4</sub> C <sub>1</sub> im][CF <sub>3</sub> CO <sub>2</sub> ]                | [2]       | Training | 313.15 | 0.7820                        | -0.2459            | -1.1201             | 0.3263                         | 58.28%          | -0.3331                  | 0.7167                         | 8.35%           |

|                                                                                                    |     |          |        |        |         |         |        |        |         |        |        |
|----------------------------------------------------------------------------------------------------|-----|----------|--------|--------|---------|---------|--------|--------|---------|--------|--------|
| [C <sub>4</sub> C <sub>1</sub> im][CF <sub>3</sub> CO <sub>2</sub> ]                               | [2] | Training | 328.15 | 1.2200 | 0.1989  | -0.4895 | 0.6129 | 49.76% | 0.1555  | 1.1682 | 4.24%  |
| [C <sub>4</sub> C <sub>1</sub> im][CF <sub>3</sub> CO <sub>2</sub> ]                               | [2] | Training | 338.15 | 1.5600 | 0.4447  | -0.0947 | 0.9096 | 41.69% | 0.4167  | 1.5170 | 2.76%  |
| [C <sub>4</sub> C <sub>1</sub> im][CF <sub>3</sub> CO <sub>2</sub> ]                               | [2] | Training | 343.15 | 1.7500 | 0.5596  | 0.0956  | 1.1003 | 37.12% | 0.5319  | 1.7022 | 2.73%  |
| [C <sub>4</sub> C <sub>1</sub> im][CF <sub>3</sub> CO <sub>2</sub> ]                               | [2] | Training | 348.15 | 1.9300 | 0.6575  | 0.2814  | 1.3250 | 31.35% | 0.6383  | 1.8932 | 1.91%  |
| [C <sub>2</sub> C <sub>1</sub> im][CH <sub>3</sub> SO <sub>3</sub> ]                               | [2] | Training | 353.15 | 1.9940 | 0.6901  | 0.8095  | 2.2469 | 12.68% | 0.6737  | 1.9614 | 1.64%  |
| [C <sub>2</sub> C <sub>1</sub> im][CH <sub>3</sub> SO <sub>3</sub> ]                               | [2] | Training | 343.15 | 1.5460 | 0.4357  | 0.4531  | 1.5732 | 1.76%  | 0.4053  | 1.4998 | 2.99%  |
| [C <sub>2</sub> C <sub>1</sub> im][CH <sub>3</sub> SO <sub>3</sub> ]                               | [2] | Training | 333.15 | 1.1510 | 0.1406  | 0.0793  | 1.0826 | 5.94%  | 0.0955  | 1.1002 | 4.42%  |
| [C <sub>2</sub> C <sub>1</sub> im][CH <sub>3</sub> SO <sub>3</sub> ]                               | [2] | Training | 323.15 | 0.8210 | -0.1972 | -0.3131 | 0.7312 | 10.94% | -0.2633 | 0.7685 | 6.39%  |
| [C <sub>2</sub> C <sub>1</sub> im][CH <sub>3</sub> SO <sub>3</sub> ]                               | [2] | Training | 313.15 | 0.5530 | -0.5924 | -0.7257 | 0.4840 | 12.48% | -0.6795 | 0.5068 | 8.35%  |
| [C <sub>2</sub> C <sub>1</sub> im][CH <sub>3</sub> SO <sub>3</sub> ]                               | [2] | Training | 308.15 | 0.4351 | -0.8322 | -0.9402 | 0.3906 | 10.24% | -0.9124 | 0.4016 | 7.71%  |
| [C <sub>2</sub> C <sub>1</sub> im][CH <sub>3</sub> SO <sub>3</sub> ]                               | [2] | Training | 303.15 | 0.3464 | -1.0602 | -1.1604 | 0.3134 | 9.54%  | -1.1636 | 0.3124 | 9.83%  |
| [C <sub>2</sub> C <sub>1</sub> im][CH <sub>3</sub> SO <sub>3</sub> ]                               | [2] | Training | 298.15 | 0.2650 | -1.3280 | -1.3867 | 0.2499 | 5.70%  | -1.4347 | 0.2382 | 10.11% |
| [C <sub>2</sub> C <sub>1</sub> im][CH <sub>3</sub> SO <sub>3</sub> ]                               | [2] | Training | 293.15 | 0.1972 | -1.6235 | -1.6193 | 0.1980 | 0.42%  | -1.7271 | 0.1778 | 9.83%  |
| [C <sub>2</sub> C <sub>1</sub> im][CH <sub>3</sub> SO <sub>3</sub> ]                               | [2] | Training | 278.15 | 0.0656 | -2.7242 | -2.3586 | 0.0946 | 44.13% | -2.7481 | 0.0641 | 2.36%  |
| [C <sub>2</sub> C <sub>1</sub> im][CH <sub>3</sub> SO <sub>3</sub> ]                               | [2] | Training | 273.15 | 0.0413 | -3.1859 | -2.6201 | 0.0728 | 76.10% | -3.1413 | 0.0432 | 4.56%  |
| [C <sub>2</sub> C <sub>1</sub> im][(C <sub>2</sub> F <sub>5</sub> ) <sub>3</sub> PF <sub>3</sub> ] | [2] | Training | 278.15 | 0.2240 | -1.4961 | -1.5405 | 0.2143 | 4.34%  | -1.6031 | 0.2013 | 10.15% |
| [C <sub>2</sub> C <sub>1</sub> im][(C <sub>2</sub> F <sub>5</sub> ) <sub>3</sub> PF <sub>3</sub> ] | [2] | Training | 288.15 | 0.3620 | -1.0161 | -1.0932 | 0.3351 | 7.42%  | -1.0925 | 0.3354 | 7.36%  |
| [C <sub>2</sub> C <sub>1</sub> im][(C <sub>2</sub> F <sub>5</sub> ) <sub>3</sub> PF <sub>3</sub> ] | [2] | Training | 308.15 | 0.7570 | -0.2784 | -0.2795 | 0.7562 | 0.11%  | -0.2691 | 0.7641 | 0.94%  |
| [C <sub>2</sub> C <sub>1</sub> im][(C <sub>2</sub> F <sub>5</sub> ) <sub>3</sub> PF <sub>3</sub> ] | [2] | Training | 318.15 | 1.0180 | 0.0178  | 0.0920  | 1.0964 | 7.70%  | 0.0609  | 1.0628 | 4.41%  |
| [C <sub>2</sub> C <sub>1</sub> im][(C <sub>2</sub> F <sub>5</sub> ) <sub>3</sub> PF <sub>3</sub> ] | [2] | Training | 338.15 | 1.6580 | 0.5056  | 0.7745  | 2.1696 | 30.86% | 0.5940  | 1.8112 | 9.24%  |
| [C <sub>2</sub> C <sub>1</sub> im][(C <sub>2</sub> F <sub>5</sub> ) <sub>3</sub> PF <sub>3</sub> ] | [2] | Training | 348.15 | 2.0280 | 0.7071  | 1.0890  | 2.9714 | 46.52% | 0.8087  | 2.2450 | 10.70% |
| [C <sub>2</sub> C <sub>1</sub> im][(C <sub>2</sub> F <sub>5</sub> ) <sub>3</sub> PF <sub>3</sub> ] | [2] | Training | 358.15 | 2.4290 | 0.8875  | 1.3876  | 4.0053 | 64.89% | 0.9951  | 2.7049 | 11.36% |
| [C <sub>6</sub> C <sub>1</sub> im][(C <sub>2</sub> F <sub>5</sub> ) <sub>3</sub> PF <sub>3</sub> ] | [2] | Training | 298.15 | 0.1665 | -1.7928 | -1.7871 | 0.1675 | 0.57%  | -1.8997 | 0.1496 | 10.15% |
| [C <sub>6</sub> C <sub>1</sub> im][(C <sub>2</sub> F <sub>5</sub> ) <sub>3</sub> PF <sub>3</sub> ] | [2] | Training | 303.15 | 0.2090 | -1.5654 | -1.5716 | 0.2077 | 0.61%  | -1.6472 | 0.1926 | 7.85%  |
| [C <sub>6</sub> C <sub>1</sub> im][(C <sub>2</sub> F <sub>5</sub> ) <sub>3</sub> PF <sub>3</sub> ] | [2] | Training | 308.15 | 0.2580 | -1.3548 | -1.3621 | 0.2561 | 0.72%  | -1.4125 | 0.2435 | 5.61%  |
| [C <sub>6</sub> C <sub>1</sub> im][(C <sub>2</sub> F <sub>5</sub> ) <sub>3</sub> PF <sub>3</sub> ] | [2] | Training | 313.15 | 0.3130 | -1.1616 | -1.1583 | 0.3140 | 0.33%  | -1.1941 | 0.3030 | 3.21%  |
| [C <sub>6</sub> C <sub>1</sub> im][(C <sub>2</sub> F <sub>5</sub> ) <sub>3</sub> PF <sub>3</sub> ] | [2] | Training | 318.15 | 0.3740 | -0.9835 | -0.9599 | 0.3829 | 2.39%  | -0.9907 | 0.3713 | 0.72%  |
| [C <sub>6</sub> C <sub>1</sub> im][(C <sub>2</sub> F <sub>5</sub> ) <sub>3</sub> PF <sub>3</sub> ] | [2] | Training | 328.15 | 0.5140 | -0.6655 | -0.5785 | 0.5607 | 9.09%  | -0.6236 | 0.5360 | 4.29%  |
| [C <sub>6</sub> C <sub>1</sub> im][(C <sub>2</sub> F <sub>5</sub> ) <sub>3</sub> PF <sub>3</sub> ] | [2] | Training | 333.15 | 0.5930 | -0.5226 | -0.3951 | 0.6736 | 13.60% | -0.4575 | 0.6329 | 6.72%  |
| [C <sub>6</sub> C <sub>1</sub> im][(C <sub>2</sub> F <sub>5</sub> ) <sub>3</sub> PF <sub>3</sub> ] | [2] | Training | 338.15 | 0.6760 | -0.3916 | -0.2162 | 0.8056 | 19.17% | -0.3017 | 0.7395 | 9.40%  |
| [C <sub>6</sub> C <sub>1</sub> im][(C <sub>2</sub> F <sub>5</sub> ) <sub>3</sub> PF <sub>3</sub> ] | [2] | Training | 343.15 | 0.7690 | -0.2627 | -0.0417 | 0.9592 | 24.73% | -0.1553 | 0.8561 | 11.33% |
| [C <sub>2</sub> C <sub>1</sub> im][C <sub>2</sub> H <sub>5</sub> SO <sub>4</sub> ]                 | [2] | Training | 298.10 | 0.3820 | -0.9623 | -1.6325 | 0.1954 | 48.84% | -0.8627 | 0.4220 | 10.48% |
| [C <sub>2</sub> C <sub>1</sub> im][C <sub>2</sub> H <sub>5</sub> SO <sub>4</sub> ]                 | [2] | Training | 303.10 | 0.4850 | -0.7236 | -1.4171 | 0.2424 | 50.02% | -0.6844 | 0.5044 | 4.00%  |

|                                                                                                     |     |          |        |        |         |         |        |         |         |        |        |
|-----------------------------------------------------------------------------------------------------|-----|----------|--------|--------|---------|---------|--------|---------|---------|--------|--------|
| [C <sub>2</sub> C <sub>1</sub> im][C <sub>2</sub> H <sub>5</sub> SO <sub>4</sub> ]                  | [2] | Training | 313.10 | 0.7200 | -0.3285 | -1.0046 | 0.3662 | 49.14%  | -0.3719 | 0.6894 | 4.25%  |
| [C <sub>2</sub> C <sub>1</sub> im][C <sub>2</sub> H <sub>5</sub> SO <sub>4</sub> ]                  | [2] | Training | 318.10 | 0.8600 | -0.1508 | -0.8068 | 0.4463 | 48.11%  | -0.2348 | 0.7907 | 8.05%  |
| [C <sub>2</sub> C <sub>1</sub> im][C <sub>2</sub> H <sub>5</sub> SO <sub>4</sub> ]                  | [2] | Training | 298.15 | 0.3800 | -0.9676 | -1.6303 | 0.1959 | 48.46%  | -0.8608 | 0.4228 | 11.27% |
| [C <sub>2</sub> C <sub>1</sub> im][C <sub>2</sub> H <sub>5</sub> SO <sub>4</sub> ]                  | [2] | Training | 303.15 | 0.4680 | -0.7593 | -1.4150 | 0.2429 | 48.09%  | -0.6827 | 0.5053 | 7.96%  |
| [C <sub>2</sub> C <sub>1</sub> im][C <sub>2</sub> H <sub>5</sub> SO <sub>4</sub> ]                  | [2] | Training | 313.15 | 0.6750 | -0.3930 | -1.0026 | 0.3669 | 45.64%  | -0.3705 | 0.6904 | 2.28%  |
| [C <sub>2</sub> C <sub>1</sub> im][C <sub>2</sub> H <sub>5</sub> SO <sub>4</sub> ]                  | [2] | Training | 318.15 | 0.8560 | -0.1555 | -0.8049 | 0.4472 | 47.76%  | -0.2335 | 0.7918 | 7.50%  |
| [C <sub>2</sub> C <sub>1</sub> im][C <sub>2</sub> H <sub>5</sub> SO <sub>4</sub> ]                  | [2] | Training | 323.15 | 1.0005 | 0.0005  | -0.6125 | 0.5420 | 45.83%  | -0.1073 | 0.8983 | 10.22% |
| [C <sub>4</sub> C <sub>1</sub> im][N(C <sub>2</sub> F <sub>5</sub> SO <sub>2</sub> ) <sub>2</sub> ] | [2] | Training | 388.15 | 1.8560 | 0.6184  | 1.2168  | 3.3762 | 81.91%  | 0.5559  | 1.7436 | 6.06%  |
| [C <sub>4</sub> C <sub>1</sub> im][N(C <sub>2</sub> F <sub>5</sub> SO <sub>2</sub> ) <sub>2</sub> ] | [2] | Training | 378.15 | 1.5640 | 0.4472  | 0.9756  | 2.6528 | 69.61%  | 0.3699  | 1.4476 | 7.44%  |
| [C <sub>4</sub> C <sub>1</sub> im][N(C <sub>2</sub> F <sub>5</sub> SO <sub>2</sub> ) <sub>2</sub> ] | [2] | Training | 358.15 | 1.0500 | 0.0488  | 0.4559  | 1.5776 | 50.25%  | -0.0521 | 0.9492 | 9.60%  |
| [C <sub>4</sub> C <sub>1</sub> im][N(C <sub>2</sub> F <sub>5</sub> SO <sub>2</sub> ) <sub>2</sub> ] | [2] | Training | 353.15 | 0.9280 | -0.0747 | 0.3174  | 1.3736 | 48.02%  | -0.1697 | 0.8439 | 9.06%  |
| [C <sub>4</sub> C <sub>1</sub> im][N(C <sub>2</sub> F <sub>5</sub> SO <sub>2</sub> ) <sub>2</sub> ] | [2] | Training | 348.15 | 0.8310 | -0.1851 | 0.1753  | 1.1916 | 43.39%  | -0.2927 | 0.7462 | 10.20% |
| [C <sub>4</sub> C <sub>1</sub> im][N(C <sub>2</sub> F <sub>5</sub> SO <sub>2</sub> ) <sub>2</sub> ] | [2] | Training | 343.15 | 0.7240 | -0.3230 | 0.0293  | 1.0297 | 42.22%  | -0.4217 | 0.6559 | 9.41%  |
| [C <sub>4</sub> C <sub>1</sub> im][N(C <sub>2</sub> F <sub>5</sub> SO <sub>2</sub> ) <sub>2</sub> ] | [2] | Training | 338.15 | 0.6380 | -0.4494 | -0.1208 | 0.8862 | 38.90%  | -0.5573 | 0.5727 | 10.23% |
| [C <sub>4</sub> C <sub>1</sub> im][N(C <sub>2</sub> F <sub>5</sub> SO <sub>2</sub> ) <sub>2</sub> ] | [2] | Training | 333.15 | 0.5490 | -0.5997 | -0.2751 | 0.7595 | 38.35%  | -0.7000 | 0.4966 | 9.55%  |
| [C <sub>4</sub> C <sub>1</sub> im][N(C <sub>2</sub> F <sub>5</sub> SO <sub>2</sub> ) <sub>2</sub> ] | [2] | Training | 323.15 | 0.4000 | -0.9163 | -0.5971 | 0.5504 | 37.61%  | -1.0098 | 0.3643 | 8.92%  |
| [C <sub>4</sub> C <sub>1</sub> im][N(C <sub>2</sub> F <sub>5</sub> SO <sub>2</sub> ) <sub>2</sub> ] | [2] | Training | 318.15 | 0.3364 | -1.0895 | -0.7652 | 0.4653 | 38.30%  | -1.1785 | 0.3077 | 8.52%  |
| [C <sub>4</sub> C <sub>1</sub> im][N(C <sub>2</sub> F <sub>5</sub> SO <sub>2</sub> ) <sub>2</sub> ] | [2] | Training | 308.15 | 0.2274 | -1.4810 | -1.1169 | 0.3273 | 43.93%  | -1.5485 | 0.2126 | 6.53%  |
| [C <sub>4</sub> C <sub>1</sub> im][N(C <sub>2</sub> F <sub>5</sub> SO <sub>2</sub> ) <sub>2</sub> ] | [2] | Training | 303.15 | 0.1829 | -1.6988 | -1.3011 | 0.2722 | 48.85%  | -1.7522 | 0.1734 | 5.20%  |
| [C <sub>4</sub> C <sub>1</sub> im][N(C <sub>2</sub> F <sub>5</sub> SO <sub>2</sub> ) <sub>2</sub> ] | [2] | Training | 298.15 | 0.1450 | -1.9310 | -1.4911 | 0.2251 | 55.26%  | -1.9700 | 0.1395 | 3.82%  |
| [C <sub>4</sub> C <sub>1</sub> im][N(C <sub>2</sub> F <sub>5</sub> SO <sub>2</sub> ) <sub>2</sub> ] | [2] | Training | 288.15 | 0.0853 | -2.4616 | -1.8900 | 0.1511 | 77.10%  | -2.4537 | 0.0860 | 0.79%  |
| [C <sub>4</sub> C <sub>1</sub> im][N(C <sub>2</sub> F <sub>5</sub> SO <sub>2</sub> ) <sub>2</sub> ] | [2] | Training | 283.15 | 0.0634 | -2.7583 | -2.0996 | 0.1225 | 93.22%  | -2.7225 | 0.0657 | 3.64%  |
| [C <sub>4</sub> C <sub>1</sub> im][N(C <sub>2</sub> F <sub>5</sub> SO <sub>2</sub> ) <sub>2</sub> ] | [2] | Training | 278.15 | 0.0460 | -3.0791 | -2.3166 | 0.0986 | 114.38% | -3.0115 | 0.0492 | 6.99%  |
| [C <sub>4</sub> C <sub>1</sub> im][N(C <sub>2</sub> F <sub>5</sub> SO <sub>2</sub> ) <sub>2</sub> ] | [2] | Training | 273.15 | 0.0324 | -3.4296 | -2.5412 | 0.0788 | 143.13% | -3.3221 | 0.0361 | 11.35% |
| [C <sub>4</sub> C <sub>1</sub> im][PF <sub>6</sub> ]                                                | [2] | Training | 328.15 | 0.5780 | -0.5482 | -0.0358 | 0.9649 | 66.93%  | -0.6541 | 0.5199 | 10.05% |
| [C <sub>4</sub> C <sub>1</sub> im][PF <sub>6</sub> ]                                                | [2] | Training | 338.15 | 0.8150 | -0.2046 | 0.3334  | 1.3957 | 71.25%  | -0.3121 | 0.7319 | 10.19% |
| [C <sub>4</sub> C <sub>1</sub> im][PF <sub>6</sub> ]                                                | [2] | Training | 348.15 | 1.1020 | 0.0971  | 0.6833  | 1.9805 | 79.72%  | -0.0102 | 0.9899 | 10.18% |
| [C <sub>4</sub> C <sub>1</sub> im][PF <sub>6</sub> ]                                                | [2] | Training | 358.15 | 1.4400 | 0.3646  | 1.0155  | 2.7608 | 91.72%  | 0.2579  | 1.2942 | 10.13% |
| [C <sub>4</sub> C <sub>1</sub> im][PF <sub>6</sub> ]                                                | [2] | Training | 368.15 | 1.8250 | 0.6016  | 1.3313  | 3.7858 | 107.44% | 0.4973  | 1.6443 | 9.90%  |
| [C <sub>6</sub> C <sub>1</sub> im][PF <sub>6</sub> ]                                                | [2] | Training | 278.15 | 0.0117 | -4.4465 | -3.1071 | 0.0447 | 281.67% | -4.2717 | 0.0140 | 19.10% |
| [C <sub>6</sub> C <sub>1</sub> im][PF <sub>6</sub> ]                                                | [2] | Training | 288.15 | 0.0270 | -3.6104 | -2.5902 | 0.0750 | 177.40% | -3.5028 | 0.0301 | 11.36% |
| [C <sub>6</sub> C <sub>1</sub> im][PF <sub>6</sub> ]                                                | [2] | Training | 293.15 | 0.0386 | -3.2545 | -2.3432 | 0.0960 | 148.76% | -3.1587 | 0.0425 | 10.05% |
| [C <sub>6</sub> C <sub>1</sub> im][PF <sub>6</sub> ]                                                | [2] | Training | 303.15 | 0.0724 | -2.6255 | -1.8703 | 0.1541 | 112.81% | -2.5433 | 0.0786 | 8.57%  |

|                                                                                       |     |          |        |        |         |         |        |         |         |        |        |
|---------------------------------------------------------------------------------------|-----|----------|--------|--------|---------|---------|--------|---------|---------|--------|--------|
| [C <sub>6</sub> C <sub>1</sub> im][PF <sub>6</sub> ]                                  | [2] | Training | 308.15 | 0.0964 | -2.3392 | -1.6438 | 0.1932 | 100.46% | -2.2687 | 0.1034 | 7.31%  |
| [C <sub>6</sub> C <sub>1</sub> im][PF <sub>6</sub> ]                                  | [2] | Training | 313.15 | 0.1260 | -2.0715 | -1.4235 | 0.2409 | 91.17%  | -2.0141 | 0.1334 | 5.91%  |
| [C <sub>6</sub> C <sub>1</sub> im][PF <sub>6</sub> ]                                  | [2] | Training | 318.15 | 0.1612 | -1.8251 | -1.2090 | 0.2985 | 85.16%  | -1.7778 | 0.1690 | 4.84%  |
| [C <sub>6</sub> C <sub>1</sub> im][PF <sub>6</sub> ]                                  | [2] | Training | 333.15 | 0.3069 | -1.1812 | -0.5988 | 0.5495 | 79.04%  | -1.1642 | 0.3122 | 1.72%  |
| [C <sub>6</sub> C <sub>1</sub> im][PF <sub>6</sub> ]                                  | [2] | Training | 348.15 | 0.4830 | -0.7277 | -0.0335 | 0.9670 | 100.21% | -0.6663 | 0.5136 | 6.34%  |
| [C <sub>6</sub> C <sub>1</sub> im][PF <sub>6</sub> ]                                  | [2] | Training | 328.15 | 0.2640 | -1.3318 | -0.7970 | 0.4507 | 70.72%  | -1.3543 | 0.2581 | 2.22%  |
| [C <sub>3</sub> C <sub>1</sub> im][SCN]                                               | [2] | Training | 323.15 | 1.3300 | 0.2852  | 0.3483  | 1.4166 | 6.51%   | 0.2531  | 1.2880 | 3.16%  |
| [C <sub>3</sub> C <sub>1</sub> im][SCN]                                               | [2] | Training | 318.15 | 1.1000 | 0.0953  | 0.1320  | 1.1411 | 3.73%   | 0.1052  | 1.1109 | 0.99%  |
| [C <sub>3</sub> C <sub>1</sub> im][SCN]                                               | [2] | Training | 313.15 | 0.9050 | -0.0998 | -0.0899 | 0.9140 | 1.00%   | -0.0593 | 0.9425 | 4.14%  |
| [C <sub>3</sub> C <sub>1</sub> im][SCN]                                               | [2] | Training | 308.15 | 0.7330 | -0.3106 | -0.3175 | 0.7280 | 0.68%   | -0.2421 | 0.7850 | 7.09%  |
| [C <sub>3</sub> C <sub>1</sub> im][SCN]                                               | [2] | Training | 303.15 | 0.5830 | -0.5396 | -0.5511 | 0.5763 | 1.14%   | -0.4453 | 0.6406 | 9.88%  |
| [C <sub>3</sub> C <sub>1</sub> im][SCN]                                               | [2] | Training | 298.15 | 0.4590 | -0.7787 | -0.7910 | 0.4534 | 1.22%   | -0.6710 | 0.5112 | 11.37% |
| [C <sub>3</sub> C <sub>1</sub> im][SCN]                                               | [2] | Training | 293.15 | 0.3610 | -1.0189 | -1.0374 | 0.3544 | 1.84%   | -0.9213 | 0.3980 | 10.25% |
| [C <sub>2</sub> C <sub>1</sub> im][N(CF <sub>3</sub> SO <sub>2</sub> ) <sub>2</sub> ] | [2] | Training | 293.15 | 0.7520 | -0.2850 | -0.7946 | 0.4518 | 39.92%  | -0.1777 | 0.8372 | 11.33% |
| [C <sub>2</sub> C <sub>1</sub> im][N(CF <sub>3</sub> SO <sub>2</sub> ) <sub>2</sub> ] | [2] | Training | 313.15 | 1.3500 | 0.3001  | -0.0496 | 0.9516 | 29.51%  | 0.3915  | 1.4793 | 9.57%  |
| [C <sub>2</sub> C <sub>1</sub> im][N(CF <sub>3</sub> SO <sub>2</sub> ) <sub>2</sub> ] | [2] | Training | 333.15 | 2.1000 | 0.7419  | 0.6077  | 1.8363 | 12.56%  | 0.7959  | 2.2165 | 5.55%  |
| [C <sub>2</sub> C <sub>1</sub> im][N(CF <sub>3</sub> SO <sub>2</sub> ) <sub>2</sub> ] | [2] | Training | 353.15 | 3.0500 | 1.1151  | 1.1925  | 3.2952 | 8.04%   | 1.0954  | 2.9903 | 1.96%  |
| [C <sub>4</sub> C <sub>1</sub> im][N(CF <sub>3</sub> SO <sub>2</sub> ) <sub>2</sub> ] | [2] | Training | 298.15 | 0.4030 | -0.9088 | -1.5611 | 0.2099 | 47.91%  | -0.9933 | 0.3704 | 8.10%  |
| [C <sub>4</sub> C <sub>1</sub> im][N(CF <sub>3</sub> SO <sub>2</sub> ) <sub>2</sub> ] | [2] | Training | 323.15 | 0.9100 | -0.0943 | -0.6168 | 0.5396 | 40.70%  | -0.1168 | 0.8897 | 2.23%  |
| [C <sub>4</sub> C <sub>1</sub> im][N(CF <sub>3</sub> SO <sub>2</sub> ) <sub>2</sub> ] | [2] | Training | 348.15 | 1.6200 | 0.4824  | 0.2018  | 1.2236 | 24.47%  | 0.4913  | 1.6345 | 0.89%  |
| [C <sub>4</sub> C <sub>1</sub> im][N(CF <sub>3</sub> SO <sub>2</sub> ) <sub>2</sub> ] | [2] | Training | 301.15 | 0.4525 | -0.7930 | -1.4401 | 0.2369 | 47.65%  | -0.8684 | 0.4196 | 7.26%  |
| [C <sub>4</sub> C <sub>1</sub> im][N(CF <sub>3</sub> SO <sub>2</sub> ) <sub>2</sub> ] | [2] | Training | 303.15 | 0.4876 | -0.7183 | -1.3607 | 0.2565 | 47.40%  | -0.7886 | 0.4545 | 6.79%  |
| [C <sub>4</sub> C <sub>1</sub> im][N(CF <sub>3</sub> SO <sub>2</sub> ) <sub>2</sub> ] | [2] | Training | 305.15 | 0.5244 | -0.6455 | -1.2823 | 0.2774 | 47.10%  | -0.7113 | 0.4910 | 6.37%  |
| [C <sub>4</sub> C <sub>1</sub> im][N(CF <sub>3</sub> SO <sub>2</sub> ) <sub>2</sub> ] | [2] | Training | 308.15 | 0.5812 | -0.5427 | -1.1664 | 0.3115 | 46.41%  | -0.6001 | 0.5487 | 5.59%  |
| [C <sub>4</sub> C <sub>1</sub> im][N(CF <sub>3</sub> SO <sub>2</sub> ) <sub>2</sub> ] | [2] | Training | 313.15 | 0.6839 | -0.3799 | -0.9778 | 0.3761 | 45.00%  | -0.4264 | 0.6529 | 4.54%  |
| [C <sub>4</sub> C <sub>1</sub> im][N(CF <sub>3</sub> SO <sub>2</sub> ) <sub>2</sub> ] | [2] | Training | 318.15 | 0.7955 | -0.2288 | -0.7947 | 0.4517 | 43.22%  | -0.2657 | 0.7666 | 3.63%  |
| [C <sub>4</sub> C <sub>1</sub> im][N(CF <sub>3</sub> SO <sub>2</sub> ) <sub>2</sub> ] | [2] | Training | 328.15 | 1.0750 | 0.0723  | -0.4440 | 0.6415 | 40.33%  | 0.0216  | 1.0218 | 4.95%  |
| [C <sub>4</sub> C <sub>1</sub> im][N(CF <sub>3</sub> SO <sub>2</sub> ) <sub>2</sub> ] | [2] | Training | 333.15 | 1.2420 | 0.2167  | -0.2759 | 0.7589 | 38.90%  | 0.1506  | 1.1626 | 6.39%  |
| [C <sub>4</sub> C <sub>1</sub> im][N(CF <sub>3</sub> SO <sub>2</sub> ) <sub>2</sub> ] | [2] | Training | 353.15 | 1.9770 | 0.6816  | 0.3528  | 1.4230 | 28.02%  | 0.5920  | 1.8077 | 8.57%  |
| [C <sub>4</sub> C <sub>1</sub> im][N(CF <sub>3</sub> SO <sub>2</sub> ) <sub>2</sub> ] | [2] | Training | 273.15 | 0.1180 | -2.1371 | -2.6653 | 0.0696 | 41.04%  | -2.3254 | 0.0977 | 17.17% |
| [C <sub>4</sub> C <sub>1</sub> im][N(CF <sub>3</sub> SO <sub>2</sub> ) <sub>2</sub> ] | [2] | Training | 288.15 | 0.2590 | -1.3509 | -1.9812 | 0.1379 | 46.76%  | -1.4587 | 0.2325 | 10.22% |
| [C <sub>4</sub> C <sub>1</sub> im][N(CF <sub>3</sub> SO <sub>2</sub> ) <sub>2</sub> ] | [2] | Training | 293.15 | 0.3230 | -1.1301 | -1.7678 | 0.1707 | 47.15%  | -1.2160 | 0.2964 | 8.23%  |
| [C <sub>6</sub> C <sub>1</sub> im][N(CF <sub>3</sub> SO <sub>2</sub> ) <sub>2</sub> ] | [2] | Training | 278.15 | 0.0776 | -2.5562 | -3.0805 | 0.0459 | 40.81%  | -2.6641 | 0.0697 | 10.23% |

|                                                                                       |     |          |        |        |         |         |        |        |         |        |        |
|---------------------------------------------------------------------------------------|-----|----------|--------|--------|---------|---------|--------|--------|---------|--------|--------|
| [C <sub>6</sub> C <sub>1</sub> im][N(CF <sub>3</sub> SO <sub>2</sub> ) <sub>2</sub> ] | [2] | Training | 288.15 | 0.1359 | -1.9958 | -2.6114 | 0.0734 | 45.97% | -2.0599 | 0.1275 | 6.21%  |
| [C <sub>6</sub> C <sub>1</sub> im][N(CF <sub>3</sub> SO <sub>2</sub> ) <sub>2</sub> ] | [2] | Training | 298.15 | 0.2178 | -1.5242 | -2.1704 | 0.1141 | 47.60% | -1.5558 | 0.2110 | 3.11%  |
| [C <sub>6</sub> C <sub>1</sub> im][N(CF <sub>3</sub> SO <sub>2</sub> ) <sub>2</sub> ] | [2] | Training | 308.15 | 0.3275 | -1.1163 | -1.7547 | 0.1730 | 47.19% | -1.1349 | 0.3215 | 1.85%  |
| [C <sub>6</sub> C <sub>1</sub> im][N(CF <sub>3</sub> SO <sub>2</sub> ) <sub>2</sub> ] | [2] | Training | 318.15 | 0.4660 | -0.7636 | -1.3619 | 0.2562 | 45.03% | -0.7818 | 0.4576 | 1.80%  |
| [C <sub>6</sub> C <sub>1</sub> im][N(CF <sub>3</sub> SO <sub>2</sub> ) <sub>2</sub> ] | [2] | Training | 328.15 | 0.6340 | -0.4557 | -0.9901 | 0.3715 | 41.40% | -0.4827 | 0.6171 | 2.66%  |
| [C <sub>6</sub> C <sub>1</sub> im][N(CF <sub>3</sub> SO <sub>2</sub> ) <sub>2</sub> ] | [2] | Training | 338.15 | 0.8300 | -0.1863 | -0.6374 | 0.5287 | 36.31% | -0.2262 | 0.7976 | 3.91%  |
| [C <sub>6</sub> C <sub>1</sub> im][N(CF <sub>3</sub> SO <sub>2</sub> ) <sub>2</sub> ] | [2] | Training | 348.15 | 1.0540 | 0.0526  | -0.3023 | 0.7391 | 29.88% | -0.0029 | 0.9971 | 5.39%  |
| [C <sub>6</sub> C <sub>1</sub> im][N(CF <sub>3</sub> SO <sub>2</sub> ) <sub>2</sub> ] | [2] | Training | 368.15 | 1.5790 | 0.4568  | 0.3204  | 1.3777 | 12.75% | 0.3719  | 1.4504 | 8.14%  |
| [C <sub>6</sub> C <sub>1</sub> im][N(CF <sub>3</sub> SO <sub>2</sub> ) <sub>2</sub> ] | [2] | Training | 378.15 | 1.8750 | 0.6286  | 0.6104  | 1.8411 | 1.81%  | 0.5332  | 1.7043 | 9.10%  |
| [C <sub>6</sub> C <sub>1</sub> im][N(CF <sub>3</sub> SO <sub>2</sub> ) <sub>2</sub> ] | [2] | Training | 388.15 | 2.1920 | 0.7848  | 0.8873  | 2.4285 | 10.79% | 0.6816  | 1.9771 | 9.81%  |
| [C <sub>6</sub> C <sub>1</sub> im][N(CF <sub>3</sub> SO <sub>2</sub> ) <sub>2</sub> ] | [2] | Training | 398.15 | 2.5260 | 0.9266  | 1.1521  | 3.1649 | 25.29% | 0.8194  | 2.2691 | 10.17% |
| [C <sub>6</sub> C <sub>1</sub> im][N(CF <sub>3</sub> SO <sub>2</sub> ) <sub>2</sub> ] | [2] | Training | 293.15 | 0.1700 | -1.7720 | -2.3876 | 0.0919 | 45.97% | -1.7964 | 0.1659 | 2.42%  |
| [C <sub>6</sub> C <sub>1</sub> im][N(CF <sub>3</sub> SO <sub>2</sub> ) <sub>2</sub> ] | [2] | Training | 303.15 | 0.2700 | -1.3093 | -1.9595 | 0.1409 | 47.80% | -1.3359 | 0.2629 | 2.63%  |
| [C <sub>6</sub> C <sub>1</sub> im][N(CF <sub>3</sub> SO <sub>2</sub> ) <sub>2</sub> ] | [2] | Training | 313.15 | 0.3900 | -0.9416 | -1.5555 | 0.2111 | 45.88% | -0.9508 | 0.3864 | 0.91%  |
| [C <sub>6</sub> C <sub>1</sub> im][N(CF <sub>3</sub> SO <sub>2</sub> ) <sub>2</sub> ] | [2] | Training | 333.15 | 0.7200 | -0.3285 | -0.8115 | 0.4442 | 38.30% | -0.3497 | 0.7049 | 2.10%  |
| [C <sub>6</sub> C <sub>1</sub> im][N(CF <sub>3</sub> SO <sub>2</sub> ) <sub>2</sub> ] | [2] | Training | 353.15 | 1.2000 | 0.1823  | -0.1409 | 0.8686 | 27.62% | 0.0987  | 1.1037 | 8.02%  |
| [C <sub>6</sub> C <sub>1</sub> im][N(CF <sub>3</sub> SO <sub>2</sub> ) <sub>2</sub> ] | [2] | Training | 283.15 | 0.1020 | -2.2828 | -2.8423 | 0.0583 | 42.85% | -2.3485 | 0.0955 | 6.36%  |
| [C <sub>2</sub> C <sub>1</sub> im][B(CN) <sub>4</sub> ]                               | [2] | Training | 278.15 | 0.7020 | -0.3538 | -0.6361 | 0.5294 | 24.59% | -0.4616 | 0.6303 | 10.22% |
| [C <sub>2</sub> C <sub>1</sub> im][B(CN) <sub>4</sub> ]                               | [2] | Training | 283.15 | 0.8840 | -0.1233 | -0.4017 | 0.6692 | 24.30% | -0.2233 | 0.7999 | 9.52%  |
| [C <sub>2</sub> C <sub>1</sub> im][B(CN) <sub>4</sub> ]                               | [2] | Training | 288.15 | 1.0880 | 0.0843  | -0.1752 | 0.8393 | 22.86% | -0.0074 | 0.9927 | 8.76%  |
| [C <sub>2</sub> C <sub>1</sub> im][B(CN) <sub>4</sub> ]                               | [2] | Training | 298.15 | 1.5560 | 0.4421  | 0.2557  | 1.2913 | 17.01% | 0.3652  | 1.4408 | 7.40%  |
| [C <sub>2</sub> C <sub>1</sub> im][B(CN) <sub>4</sub> ]                               | [2] | Training | 303.15 | 1.8080 | 0.5922  | 0.4608  | 1.5853 | 12.32% | 0.5256  | 1.6915 | 6.45%  |
| [C <sub>2</sub> C <sub>1</sub> im][B(CN) <sub>4</sub> ]                               | [2] | Training | 313.15 | 2.3790 | 0.8667  | 0.8518  | 2.3438 | 1.48%  | 0.8029  | 2.2321 | 6.17%  |
| [C <sub>2</sub> C <sub>1</sub> im][B(CN) <sub>4</sub> ]                               | [2] | Training | 323.15 | 3.0120 | 1.1026  | 1.2192  | 3.3846 | 12.37% | 1.0323  | 2.8074 | 6.79%  |
| [C <sub>2</sub> C <sub>1</sub> im][B(CN) <sub>4</sub> ]                               | [2] | Training | 333.15 | 3.6940 | 1.3067  | 1.5652  | 4.7835 | 29.49% | 1.2235  | 3.3991 | 7.98%  |
| [C <sub>2</sub> C <sub>1</sub> im][B(CN) <sub>4</sub> ]                               | [2] | Training | 343.15 | 4.4120 | 1.4843  | 1.8914  | 6.6284 | 50.24% | 1.3847  | 3.9938 | 9.48%  |
| [C <sub>2</sub> C <sub>1</sub> im][B(CN) <sub>4</sub> ]                               | [2] | Training | 353.15 | 5.1000 | 1.6292  | 2.1994  | 9.0197 | 76.86% | 1.5222  | 4.5824 | 10.15% |
| [C <sub>8</sub> C <sub>1</sub> im][BF <sub>4</sub> ]                                  | [2] | Training | 298.15 | 0.0587 | -2.8353 | -3.2444 | 0.0390 | 33.57% | -2.8122 | 0.0601 | 2.34%  |
| [C <sub>8</sub> C <sub>1</sub> im][BF <sub>4</sub> ]                                  | [2] | Training | 348.15 | 0.4860 | -0.7215 | -0.8796 | 0.4150 | 14.62% | -0.6142 | 0.5411 | 11.33% |
| [C <sub>8</sub> C <sub>1</sub> im][BF <sub>4</sub> ]                                  | [2] | Training | 308.15 | 0.1012 | -2.2907 | -2.7262 | 0.0655 | 35.31% | -2.2054 | 0.1102 | 8.90%  |
| [C <sub>8</sub> C <sub>1</sub> im][BF <sub>4</sub> ]                                  | [2] | Training | 318.15 | 0.1647 | -1.8036 | -2.2323 | 0.1073 | 34.86% | -1.6967 | 0.1833 | 11.29% |
| [C <sub>8</sub> C <sub>1</sub> im][BF <sub>4</sub> ]                                  | [2] | Training | 328.15 | 0.2520 | -1.3783 | -1.7609 | 0.1719 | 31.79% | -1.2709 | 0.2806 | 11.34% |
| [C <sub>8</sub> C <sub>1</sub> im][BF <sub>4</sub> ]                                  | [2] | Training | 338.15 | 0.3680 | -0.9997 | -1.3105 | 0.2697 | 26.71% | -0.9142 | 0.4008 | 8.93%  |

|                                                                                       |     |          |        |        |         |         |        |         |         |        |        |
|---------------------------------------------------------------------------------------|-----|----------|--------|--------|---------|---------|--------|---------|---------|--------|--------|
| [C <sub>8</sub> C <sub>1</sub> im][BF <sub>4</sub> ]                                  | [2] | Training | 358.15 | 0.6880 | -0.3740 | -0.4670 | 0.6269 | 8.89%   | -0.3604 | 0.6974 | 1.37%  |
| [C <sub>2</sub> C <sub>1</sub> im][C(CN) <sub>3</sub> ]                               | [2] | Training | 298.00 | 0.7600 | -0.2744 | 0.1550  | 1.1676 | 53.64%  | -0.3617 | 0.6965 | 8.36%  |
| [C <sub>2</sub> C <sub>1</sub> im][C(CN) <sub>3</sub> ]                               | [2] | Training | 313.00 | 1.2500 | 0.2231  | 0.7832  | 2.1884 | 75.08%  | 0.1180  | 1.1252 | 9.98%  |
| [C <sub>4</sub> C <sub>1</sub> im][CF <sub>3</sub> SO <sub>3</sub> ]                  | [2] | Training | 268.15 | 0.0539 | -2.9206 | -3.2337 | 0.0394 | 26.88%  | -3.0282 | 0.0484 | 10.20% |
| [C <sub>4</sub> C <sub>1</sub> im][CF <sub>3</sub> SO <sub>3</sub> ]                  | [2] | Training | 288.15 | 0.1808 | -1.7104 | -2.2018 | 0.1106 | 38.83%  | -1.6806 | 0.1863 | 3.02%  |
| [C <sub>4</sub> C <sub>1</sub> im][CF <sub>3</sub> SO <sub>3</sub> ]                  | [2] | Training | 298.15 | 0.2900 | -1.2379 | -1.7310 | 0.1771 | 38.93%  | -1.1654 | 0.3118 | 7.52%  |
| [C <sub>4</sub> C <sub>1</sub> im][CF <sub>3</sub> SO <sub>3</sub> ]                  | [2] | Training | 308.15 | 0.4360 | -0.8301 | -1.2866 | 0.2762 | 36.65%  | -0.7347 | 0.4796 | 10.01% |
| [C <sub>4</sub> C <sub>1</sub> im][CF <sub>3</sub> SO <sub>3</sub> ]                  | [2] | Training | 318.15 | 0.6210 | -0.4764 | -0.8662 | 0.4205 | 32.28%  | -0.3738 | 0.6881 | 10.81% |
| [C <sub>4</sub> C <sub>1</sub> im][CF <sub>3</sub> SO <sub>3</sub> ]                  | [2] | Training | 348.15 | 1.4260 | 0.3549  | 0.2699  | 1.3098 | 8.15%   | 0.4123  | 1.5103 | 5.91%  |
| [C <sub>4</sub> C <sub>1</sub> im][CF <sub>3</sub> SO <sub>3</sub> ]                  | [2] | Training | 358.15 | 1.7750 | 0.5738  | 0.6121  | 1.8443 | 3.90%   | 0.6063  | 1.8335 | 3.30%  |
| [C <sub>4</sub> C <sub>1</sub> im][CF <sub>3</sub> SO <sub>3</sub> ]                  | [2] | Training | 368.15 | 2.1600 | 0.7701  | 0.9381  | 2.5552 | 18.30%  | 0.7771  | 2.1752 | 0.70%  |
| [C <sub>4</sub> C <sub>1</sub> im][CF <sub>3</sub> SO <sub>3</sub> ]                  | [2] | Training | 293.15 | 0.2300 | -1.4697 | -1.9630 | 0.1404 | 38.94%  | -1.4114 | 0.2438 | 6.00%  |
| [C <sub>4</sub> C <sub>1</sub> im][CF <sub>3</sub> SO <sub>3</sub> ]                  | [2] | Training | 313.15 | 0.5200 | -0.6539 | -1.0736 | 0.3418 | 34.27%  | -0.5464 | 0.5790 | 11.35% |
| [C <sub>4</sub> C <sub>1</sub> im][CF <sub>3</sub> SO <sub>3</sub> ]                  | [2] | Training | 333.15 | 0.9400 | -0.0619 | -0.2763 | 0.7586 | 19.30%  | 0.0651  | 1.0672 | 13.54% |
| [C <sub>4</sub> C <sub>1</sub> im][CF <sub>3</sub> SO <sub>3</sub> ]                  | [2] | Training | 353.15 | 1.6000 | 0.4700  | 0.4431  | 1.5575 | 2.66%   | 0.5125  | 1.6694 | 4.34%  |
| [C <sub>8</sub> C <sub>1</sub> im][PF <sub>6</sub> ]                                  | [2] | Training | 283.15 | 0.0081 | -4.8196 | -3.6176 | 0.0268 | 232.68% | -4.7177 | 0.0089 | 10.73% |
| [C <sub>8</sub> C <sub>1</sub> im][PF <sub>6</sub> ]                                  | [2] | Training | 288.15 | 0.0121 | -4.4129 | -3.3539 | 0.0349 | 188.36% | -4.3281 | 0.0132 | 8.85%  |
| [C <sub>8</sub> C <sub>1</sub> im][PF <sub>6</sub> ]                                  | [2] | Training | 298.15 | 0.0252 | -3.6809 | -2.8483 | 0.0579 | 129.92% | -3.6332 | 0.0264 | 4.89%  |
| [C <sub>8</sub> C <sub>1</sub> im][PF <sub>6</sub> ]                                  | [2] | Training | 303.15 | 0.0353 | -3.3439 | -2.6058 | 0.0738 | 109.19% | -3.3245 | 0.0360 | 1.95%  |
| [C <sub>8</sub> C <sub>1</sub> im][PF <sub>6</sub> ]                                  | [2] | Training | 308.15 | 0.0479 | -3.0386 | -2.3697 | 0.0935 | 95.22%  | -3.0394 | 0.0479 | 0.08%  |
| [C <sub>8</sub> C <sub>1</sub> im][PF <sub>6</sub> ]                                  | [2] | Training | 313.15 | 0.0653 | -2.7288 | -2.1397 | 0.1177 | 80.23%  | -2.7761 | 0.0623 | 4.62%  |
| [C <sub>8</sub> C <sub>1</sub> im][PF <sub>6</sub> ]                                  | [2] | Training | 318.15 | 0.0858 | -2.4557 | -1.9156 | 0.1473 | 71.63%  | -2.5327 | 0.0794 | 7.41%  |
| [C <sub>8</sub> C <sub>1</sub> im][PF <sub>6</sub> ]                                  | [2] | Training | 323.15 | 0.1108 | -2.2000 | -1.6970 | 0.1832 | 65.36%  | -2.3077 | 0.0995 | 10.21% |
| [C <sub>8</sub> C <sub>1</sub> im][N(CF <sub>3</sub> SO <sub>2</sub> ) <sub>2</sub> ] | [2] | Training | 293.15 | 0.1000 | -2.3026 | -2.9815 | 0.0507 | 49.28%  | -2.1951 | 0.1113 | 11.34% |
| [C <sub>8</sub> C <sub>1</sub> im][N(CF <sub>3</sub> SO <sub>2</sub> ) <sub>2</sub> ] | [2] | Training | 298.15 | 0.1300 | -2.0402 | -2.7545 | 0.0636 | 51.05%  | -1.9487 | 0.1425 | 9.58%  |
| [C <sub>8</sub> C <sub>1</sub> im][N(CF <sub>3</sub> SO <sub>2</sub> ) <sub>2</sub> ] | [2] | Training | 303.15 | 0.1600 | -1.8326 | -2.5338 | 0.0794 | 50.40%  | -1.7252 | 0.1781 | 11.34% |
| [C <sub>8</sub> C <sub>1</sub> im][N(CF <sub>3</sub> SO <sub>2</sub> ) <sub>2</sub> ] | [2] | Training | 313.15 | 0.2400 | -1.4271 | -2.1101 | 0.1212 | 49.49%  | -1.3382 | 0.2623 | 9.30%  |
| [C <sub>8</sub> C <sub>1</sub> im][N(CF <sub>3</sub> SO <sub>2</sub> ) <sub>2</sub> ] | [2] | Training | 333.15 | 0.4700 | -0.7550 | -1.3263 | 0.2655 | 43.52%  | -0.7504 | 0.4722 | 0.46%  |
| [C <sub>8</sub> C <sub>1</sub> im][N(CF <sub>3</sub> SO <sub>2</sub> ) <sub>2</sub> ] | [2] | Training | 353.15 | 0.8000 | -0.2231 | -0.6161 | 0.5401 | 32.49%  | -0.3281 | 0.7203 | 9.96%  |
| [C <sub>4</sub> C <sub>1</sub> im][BF <sub>4</sub> ]                                  | [2] | Test     | 308.20 | 0.3640 | -1.0106 | -0.7831 | 0.4570 | 25.54%  | -0.9327 | 0.3935 | 8.10%  |
| [C <sub>6</sub> C <sub>1</sub> im][BF <sub>4</sub> ]                                  | [2] | Test     | 308.15 | 0.2070 | -1.5750 | -1.8333 | 0.1599 | 22.76%  | -1.5759 | 0.2068 | 0.08%  |
| [C <sub>4</sub> C <sub>1</sub> im][CH <sub>3</sub> CO <sub>2</sub> ]                  | [2] | Test     | 358.15 | 0.7360 | -0.3065 | -0.2546 | 0.7752 | 5.33%   | -0.2365 | 0.7894 | 7.26%  |
| [C <sub>2</sub> C <sub>1</sub> im][C <sub>8</sub> H <sub>17</sub> SO <sub>4</sub> ]   | [2] | Test     | 293.10 | 0.0340 | -3.3814 | -2.6029 | 0.0741 | 117.82% | -3.4519 | 0.0317 | 6.81%  |

|                                                                                                     |     |      |        |        |         |         |        |         |         |        |        |
|-----------------------------------------------------------------------------------------------------|-----|------|--------|--------|---------|---------|--------|---------|---------|--------|--------|
| [C <sub>4</sub> C <sub>1</sub> im][CF <sub>3</sub> CO <sub>2</sub> ]                                | [2] | Test | 298.15 | 0.4550 | -0.7875 | -1.8019 | 0.1650 | 63.74%  | -0.9758 | 0.3769 | 17.17% |
| [C <sub>4</sub> C <sub>1</sub> im][CF <sub>3</sub> CO <sub>2</sub> ]                                | [2] | Test | 303.15 | 0.5470 | -0.6033 | -1.5685 | 0.2084 | 61.91%  | -0.7414 | 0.4764 | 12.90% |
| [C <sub>4</sub> C <sub>1</sub> im][CF <sub>3</sub> CO <sub>2</sub> ]                                | [2] | Test | 318.15 | 0.9200 | -0.0834 | -0.9045 | 0.4047 | 56.01%  | -0.1554 | 0.8561 | 6.95%  |
| [C <sub>4</sub> C <sub>1</sub> im][CF <sub>3</sub> CO <sub>2</sub> ]                                | [2] | Test | 323.15 | 1.0500 | 0.0488  | -0.6944 | 0.4994 | 52.44%  | 0.0070  | 1.0070 | 4.10%  |
| [C <sub>4</sub> C <sub>1</sub> im][CF <sub>3</sub> CO <sub>2</sub> ]                                | [2] | Test | 333.15 | 1.3800 | 0.3221  | -0.2897 | 0.7485 | 45.76%  | 0.2917  | 1.3386 | 3.00%  |
| [C <sub>2</sub> C <sub>1</sub> im][CH <sub>3</sub> SO <sub>3</sub> ]                                | [2] | Test | 288.15 | 0.1420 | -1.9519 | -1.8586 | 0.1559 | 9.78%   | -2.0424 | 0.1297 | 8.65%  |
| [C <sub>2</sub> C <sub>1</sub> im][CH <sub>3</sub> SO <sub>3</sub> ]                                | [2] | Test | 283.15 | 0.0988 | -2.3147 | -2.1049 | 0.1219 | 23.34%  | -2.3822 | 0.0923 | 6.54%  |
| [C <sub>2</sub> C <sub>1</sub> im][(C <sub>2</sub> F <sub>5</sub> ) <sub>3</sub> PF <sub>3</sub> ]  | [2] | Test | 298.15 | 0.5390 | -0.6180 | -0.6737 | 0.5098 | 5.42%   | -0.6508 | 0.5216 | 3.22%  |
| [C <sub>2</sub> C <sub>1</sub> im][(C <sub>2</sub> F <sub>5</sub> ) <sub>3</sub> PF <sub>3</sub> ]  | [2] | Test | 328.15 | 1.3180 | 0.2761  | 0.4427  | 1.5570 | 18.13%  | 0.3465  | 1.4142 | 7.30%  |
| [C <sub>6</sub> C <sub>1</sub> im][(C <sub>2</sub> F <sub>5</sub> ) <sub>3</sub> PF <sub>3</sub> ]  | [2] | Test | 293.15 | 0.1303 | -2.0379 | -2.0089 | 0.1341 | 2.95%   | -2.1716 | 0.1140 | 12.52% |
| [C <sub>6</sub> C <sub>1</sub> im][(C <sub>2</sub> F <sub>5</sub> ) <sub>3</sub> PF <sub>3</sub> ]  | [2] | Test | 323.15 | 0.4400 | -0.8210 | -0.7667 | 0.4645 | 5.58%   | -0.8009 | 0.4489 | 2.03%  |
| [C <sub>2</sub> C <sub>1</sub> im][C <sub>2</sub> H <sub>5</sub> SO <sub>4</sub> ]                  | [2] | Test | 308.10 | 0.6100 | -0.4943 | -1.2079 | 0.2988 | 51.01%  | -0.5213 | 0.5937 | 2.67%  |
| [C <sub>2</sub> C <sub>1</sub> im][C <sub>2</sub> H <sub>5</sub> SO <sub>4</sub> ]                  | [2] | Test | 308.15 | 0.5660 | -0.5692 | -1.2058 | 0.2994 | 47.10%  | -0.5198 | 0.5947 | 5.06%  |
| [C <sub>4</sub> C <sub>1</sub> im][N(C <sub>2</sub> F <sub>5</sub> SO <sub>2</sub> ) <sub>2</sub> ] | [2] | Test | 368.15 | 1.2930 | 0.2570  | 0.7223  | 2.0592 | 59.26%  | 0.1679  | 1.1828 | 8.53%  |
| [C <sub>4</sub> C <sub>1</sub> im][N(C <sub>2</sub> F <sub>5</sub> SO <sub>2</sub> ) <sub>2</sub> ] | [2] | Test | 328.15 | 0.4747 | -0.7451 | -0.4338 | 0.6481 | 36.52%  | -0.8506 | 0.4272 | 10.01% |
| [C <sub>4</sub> C <sub>1</sub> im][N(C <sub>2</sub> F <sub>5</sub> SO <sub>2</sub> ) <sub>2</sub> ] | [2] | Test | 313.15 | 0.2780 | -1.2801 | -0.9384 | 0.3913 | 40.74%  | -1.3577 | 0.2573 | 7.46%  |
| [C <sub>4</sub> C <sub>1</sub> im][N(C <sub>2</sub> F <sub>5</sub> SO <sub>2</sub> ) <sub>2</sub> ] | [2] | Test | 293.15 | 0.1122 | -2.1875 | -1.6873 | 0.1850 | 64.90%  | -2.2033 | 0.1104 | 1.57%  |
| [C <sub>6</sub> C <sub>1</sub> im][PF <sub>6</sub> ]                                                | [2] | Test | 283.15 | 0.0184 | -3.9981 | -2.8447 | 0.0582 | 216.91% | -3.8734 | 0.0208 | 13.29% |
| [C <sub>6</sub> C <sub>1</sub> im][PF <sub>6</sub> ]                                                | [2] | Test | 298.15 | 0.0519 | -2.9584 | -2.1034 | 0.1220 | 135.16% | -2.8394 | 0.0585 | 12.64% |
| [C <sub>6</sub> C <sub>1</sub> im][PF <sub>6</sub> ]                                                | [2] | Test | 343.15 | 0.4510 | -0.7963 | -0.2173 | 0.8047 | 78.42%  | -0.8213 | 0.4398 | 2.47%  |
| [C <sub>6</sub> C <sub>1</sub> im][PF <sub>6</sub> ]                                                | [2] | Test | 323.15 | 0.2120 | -1.5512 | -1.0003 | 0.3678 | 73.48%  | -1.5584 | 0.2105 | 0.72%  |
| [C <sub>3</sub> C <sub>1</sub> im][SCN]                                                             | [2] | Test | 288.15 | 0.2550 | -1.3665 | -1.2907 | 0.2751 | 7.87%   | -1.1986 | 0.3016 | 18.29% |
| [C <sub>4</sub> C <sub>1</sub> im][N(CF <sub>3</sub> SO <sub>2</sub> ) <sub>2</sub> ]               | [2] | Test | 283.15 | 0.2070 | -1.5750 | -2.2017 | 0.1106 | 46.56%  | -1.7232 | 0.1785 | 13.77% |
| [C <sub>4</sub> C <sub>1</sub> im][N(CF <sub>3</sub> SO <sub>2</sub> ) <sub>2</sub> ]               | [2] | Test | 311.15 | 0.6429 | -0.4418 | -1.0526 | 0.3490 | 45.71%  | -0.4942 | 0.6100 | 5.11%  |
| [C <sub>4</sub> C <sub>1</sub> im][N(CF <sub>3</sub> SO <sub>2</sub> ) <sub>2</sub> ]               | [2] | Test | 278.15 | 0.1580 | -1.8452 | -2.4296 | 0.0881 | 44.26%  | -2.0115 | 0.1338 | 15.32% |
| [C <sub>2</sub> C <sub>1</sub> im][B(CN) <sub>4</sub> ]                                             | [2] | Test | 273.15 | 0.5450 | -0.6070 | -0.8788 | 0.4153 | 23.80%  | -0.7243 | 0.4847 | 11.07% |
| [C <sub>2</sub> C <sub>1</sub> im][B(CN) <sub>4</sub> ]                                             | [2] | Test | 293.15 | 1.3110 | 0.2708  | 0.0438  | 1.0448 | 20.31%  | 0.1882  | 1.2071 | 7.93%  |
| [C <sub>8</sub> C <sub>1</sub> im][BF <sub>4</sub> ]                                                | [2] | Test | 323.15 | 0.2030 | -1.5945 | -1.9939 | 0.1362 | 32.92%  | -1.4743 | 0.2289 | 12.77% |
| [C <sub>8</sub> C <sub>1</sub> im][BF <sub>4</sub> ]                                                | [2] | Test | 288.15 | 0.0304 | -3.4933 | -3.7890 | 0.0226 | 25.60%  | -3.5327 | 0.0292 | 3.86%  |
| [C <sub>2</sub> C <sub>1</sub> im][C(CN) <sub>3</sub> ]                                             | [2] | Test | 303.00 | 0.9300 | -0.0726 | 0.3707  | 1.4488 | 55.78%  | -0.1873 | 0.8292 | 10.84% |
| [C <sub>4</sub> C <sub>1</sub> im][CF <sub>3</sub> SO <sub>3</sub> ]                                | [2] | Test | 278.15 | 0.1038 | -2.2653 | -2.7017 | 0.0671 | 35.36%  | -2.2964 | 0.1006 | 3.06%  |
| [C <sub>4</sub> C <sub>1</sub> im][CF <sub>3</sub> SO <sub>3</sub> ]                                | [2] | Test | 328.15 | 0.8480 | -0.1649 | -0.4678 | 0.6264 | 26.13%  | -0.0695 | 0.9329 | 10.01% |
| [C <sub>4</sub> C <sub>1</sub> im][CF <sub>3</sub> SO <sub>3</sub> ]                                | [2] | Test | 338.15 | 1.1170 | 0.1106  | -0.0896 | 0.9143 | 18.15%  | 0.1895  | 1.2087 | 8.21%  |



|                                                                                       |      |      |        |        |         |         |        |         |         |        |        |
|---------------------------------------------------------------------------------------|------|------|--------|--------|---------|---------|--------|---------|---------|--------|--------|
| [C <sub>8</sub> C <sub>1</sub> im][PF <sub>6</sub> ]                                  | [2]  | Test | 293.15 | 0.0177 | -4.0342 | -3.0976 | 0.0452 | 155.13% | -3.9671 | 0.0189 | 6.93%  |
| [C <sub>8</sub> C <sub>1</sub> im][PF <sub>6</sub> ]                                  | [2]  | Test | 348.15 | 0.2900 | -1.2379 | -0.6808 | 0.5062 | 74.56%  | -1.4049 | 0.2454 | 15.38% |
| [C <sub>4</sub> C <sub>1</sub> im][CH <sub>3</sub> SO <sub>4</sub> ]                  | [97] | Test | 333.15 | 0.6230 | -0.4732 | -1.0645 | 0.3449 | 44.64%  | -0.2859 | 0.7514 | 20.61% |
| [C <sub>4</sub> C <sub>1</sub> im][CH <sub>3</sub> SO <sub>4</sub> ]                  | [97] | Test | 343.15 | 0.8840 | -0.1233 | -0.6746 | 0.5094 | 42.38%  | -0.0501 | 0.9512 | 7.60%  |
| [C <sub>2</sub> C <sub>1</sub> im][CH <sub>3</sub> CO <sub>2</sub> ]                  | [98] | Test | 338.15 | 1.4770 | 0.3900  | 0.7122  | 2.0384 | 38.01%  | 0.3636  | 1.4385 | 2.61%  |
| [C <sub>2</sub> C <sub>1</sub> im][CH <sub>3</sub> CO <sub>2</sub> ]                  | [98] | Test | 348.15 | 1.9560 | 0.6709  | 1.0808  | 2.9469 | 50.66%  | 0.6990  | 2.0118 | 2.85%  |
| [C <sub>2</sub> C <sub>1</sub> im][CH <sub>3</sub> CO <sub>2</sub> ]                  | [98] | Test | 358.15 | 2.5030 | 0.9175  | 1.4323  | 4.1885 | 67.34%  | 0.9875  | 2.6846 | 7.26%  |
| [C <sub>3</sub> C <sub>1</sub> im][N(CF <sub>3</sub> SO <sub>2</sub> ) <sub>2</sub> ] | [99] | Test | 283.00 | 0.3210 | -1.1363 | -1.8339 | 0.1598 | 50.22%  | -1.2513 | 0.2861 | 10.86% |
| [C <sub>3</sub> C <sub>1</sub> im][N(CF <sub>3</sub> SO <sub>2</sub> ) <sub>2</sub> ] | [99] | Test | 292.00 | 0.4770 | -0.7402 | -1.4517 | 0.2342 | 50.91%  | -0.8211 | 0.4399 | 7.77%  |
| [C <sub>3</sub> C <sub>1</sub> im][N(CF <sub>3</sub> SO <sub>2</sub> ) <sub>2</sub> ] | [99] | Test | 303.00 | 0.7100 | -0.3425 | -1.0143 | 0.3627 | 48.92%  | -0.3770 | 0.6859 | 3.39%  |
| [C <sub>3</sub> C <sub>1</sub> im][N(CF <sub>3</sub> SO <sub>2</sub> ) <sub>2</sub> ] | [99] | Test | 313.00 | 0.9710 | -0.0294 | -0.6421 | 0.5262 | 45.81%  | -0.0369 | 0.9638 | 0.74%  |
| [C <sub>3</sub> C <sub>1</sub> im][N(CF <sub>3</sub> SO <sub>2</sub> ) <sub>2</sub> ] | [99] | Test | 323.00 | 1.2520 | 0.2247  | -0.2919 | 0.7469 | 40.35%  | 0.2547  | 1.2901 | 3.04%  |

**Table S3.** Full name, abbreviation, and numbering of IL cation and anion

| No            | Name                                     | Abbreviations                                                                  |
|---------------|------------------------------------------|--------------------------------------------------------------------------------|
| <b>Cation</b> |                                          |                                                                                |
| 1             | 1-propyl-3-methylimidazolium             | [C <sub>3</sub> C <sub>1</sub> im] <sup>+</sup>                                |
| 2             | 1-butyl-3-methylimidazolium              | [C <sub>4</sub> C <sub>1</sub> im] <sup>+</sup>                                |
| 3             | 1-pentyl-3-methylimidazolium             | [C <sub>5</sub> C <sub>1</sub> im] <sup>+</sup>                                |
| 4             | 1-hexyl-3-methylimidazolium              | [C <sub>6</sub> C <sub>1</sub> im] <sup>+</sup>                                |
| 5             | 1-heptyl-3-methylimidazolium             | [C <sub>7</sub> C <sub>1</sub> im] <sup>+</sup>                                |
| 6             | 1-octyl-3-methylimidazolium              | [C <sub>8</sub> C <sub>1</sub> im] <sup>+</sup>                                |
| 7             | 1-nonyl-3-methylimidazolium              | [C <sub>9</sub> C <sub>1</sub> im] <sup>+</sup>                                |
| <b>Anion</b>  |                                          |                                                                                |
| 1             | Bis(biphenyldiolato)borate               | [BC <sub>24</sub> H <sub>16</sub> O <sub>4</sub> ] <sup>-</sup>                |
| 2             | Dibutylphosphate                         | [(C <sub>4</sub> H <sub>9</sub> O) <sub>2</sub> PO <sub>2</sub> ] <sup>-</sup> |
| 3             | Tris(nonafluorobutyl)trifluorophosphate  | [(C <sub>4</sub> F <sub>9</sub> ) <sub>3</sub> PF <sub>3</sub> ] <sup>-</sup>  |
| 4             | Decanoate                                | [C <sub>9</sub> H <sub>20</sub> CO <sub>2</sub> ] <sup>-</sup>                 |
| 5             | 2-(2-Methoxyethoxy)ethylsulphate         | [C <sub>5</sub> OC <sub>1</sub> SO <sub>4</sub> ] <sup>-</sup>                 |
| 6             | Octylsulphate                            | [C <sub>8</sub> H <sub>17</sub> SO <sub>4</sub> ] <sup>-</sup>                 |
| 7             | Bis(salicylato)borate                    | [BC <sub>14</sub> H <sub>8</sub> O <sub>6</sub> ] <sup>-</sup>                 |
| 8             | Diethylphosphate                         | [(C <sub>2</sub> H <sub>5</sub> O) <sub>2</sub> PO <sub>2</sub> ] <sup>-</sup> |
| 9             | Toluene-4-sulfonate(tosylate)            | [C <sub>7</sub> H <sub>8</sub> SO <sub>3</sub> ] <sup>-</sup>                  |
| 10            | Ethoxyethylsulphate                      | [C <sub>4</sub> H <sub>9</sub> OSO <sub>4</sub> ] <sup>-</sup>                 |
| 11            | Dimethylphosphate                        | [(CH <sub>3</sub> O) <sub>2</sub> PO <sub>2</sub> ] <sup>-</sup>               |
| 12            | Methoxyethylsulphate                     | [C <sub>3</sub> H <sub>7</sub> OSO <sub>4</sub> ] <sup>-</sup>                 |
| 13            | Benzoate                                 | [(C <sub>6</sub> H <sub>5</sub> )CO <sub>2</sub> ] <sup>-</sup>                |
| 14            | Butylsulphate                            | [C <sub>4</sub> H <sub>9</sub> SO <sub>4</sub> ] <sup>-</sup>                  |
| 15            | acetate                                  | [CH <sub>3</sub> CO <sub>2</sub> ] <sup>-</sup>                                |
| 16            | Methanesulfonate                         | [CH <sub>3</sub> SO <sub>3</sub> ] <sup>-</sup>                                |
| 17            | Boron tetrachloride                      | [BCl <sub>4</sub> ] <sup>-</sup>                                               |
| 18            | Ethylsulfate                             | [C <sub>2</sub> H <sub>5</sub> SO <sub>4</sub> ] <sup>-</sup>                  |
| 19            | Hexafluorophosphate                      | [PF <sub>6</sub> ] <sup>-</sup>                                                |
| 20            | Bis(malonato)borate                      | [C <sub>6</sub> H <sub>4</sub> BO <sub>8</sub> ] <sup>-</sup>                  |
| 21            | Tris(pentafluoroethyl)trifluorophosphate | [(C <sub>2</sub> F <sub>5</sub> ) <sub>3</sub> PF <sub>3</sub> ] <sup>-</sup>  |
| 22            | Hexafluoroarsenate                       | [AsF <sub>6</sub> ] <sup>-</sup>                                               |
| 23            | Bis(pentafluoroethylsulfonyl)imide       | [N(C <sub>2</sub> F <sub>5</sub> SO <sub>2</sub> ) <sub>2</sub> ] <sup>-</sup> |
| 24            | Perchlorate                              | [ClO <sub>4</sub> ] <sup>-</sup>                                               |
| 25            | Salicylate                               | [C <sub>7</sub> H <sub>5</sub> O <sub>3</sub> ] <sup>-</sup>                   |
| 26            | Hexafluorostibate                        | [SbF <sub>6</sub> ] <sup>-</sup>                                               |
| 27            | Tris(trifluoromethylsulfonyl)methide     | [C(SO <sub>2</sub> CF <sub>3</sub> ) <sub>3</sub> ] <sup>-</sup>               |
| 28            | Methylsulphate                           | [CH <sub>3</sub> SO <sub>4</sub> ] <sup>-</sup>                                |
| 29            | Tetrafluoroborate                        | [BF <sub>4</sub> ] <sup>-</sup>                                                |
| 30            | Heptafluorobutanoate                     | [C <sub>3</sub> F <sub>7</sub> CO <sub>2</sub> ] <sup>-</sup>                  |
| 31            | Trifluoromethanesulfonate                | [CF <sub>3</sub> SO <sub>3</sub> ] <sup>-</sup>                                |
| 32            | Bis(pentafluoroethyl)phosphinate         | [PO <sub>2</sub> (C <sub>2</sub> F <sub>5</sub> ) <sub>2</sub> ] <sup>-</sup>  |
| 33            | Trifluoroacetate                         | [CF <sub>3</sub> CO <sub>2</sub> ] <sup>-</sup>                                |
| 34            | Thiocyanate                              | [SCN] <sup>-</sup>                                                             |
| 35            | Bis(trifluoromethanesulfonyl)methane     | [CH(CF <sub>3</sub> SO <sub>2</sub> ) <sub>2</sub> ] <sup>-</sup>              |
| 36            | Tricyanomethanide                        | [C(CN) <sub>3</sub> ] <sup>-</sup>                                             |
| 37            | Bis(trifluoromethanesulfonyl)imide       | [N(CF <sub>3</sub> SO <sub>2</sub> ) <sub>2</sub> ] <sup>-</sup>               |
| 38            | Bis(oxalate)borate                       | [B(C <sub>2</sub> O <sub>4</sub> ) <sub>2</sub> ] <sup>-</sup>                 |
| 39            | Tetracyanoborate                         | [B(CN) <sub>4</sub> ] <sup>-</sup>                                             |
| 40            | Nitrate                                  | [NO <sub>3</sub> ] <sup>-</sup>                                                |
| 41            | Nitrite                                  | [NO <sub>2</sub> ] <sup>-</sup>                                                |

**Table S4.** Cation-anion interaction energies and predicted ionic conductivity values for 287 ILs at 298.15 K using SVM regression algorithm

| Ionic Liquids                                                                                       | Interaction Energy/ $kcal \cdot mol^{-1}$ |                |                  |                 |                   |                  | $\ln \sigma_{pred}$ | $\sigma_{pred}/S \cdot m^{-1}$ |
|-----------------------------------------------------------------------------------------------------|-------------------------------------------|----------------|------------------|-----------------|-------------------|------------------|---------------------|--------------------------------|
|                                                                                                     | $E_{MF,Cation}$                           | $E_{MF,Anion}$ | $E_{vdW,Cation}$ | $E_{vdW,Anion}$ | $E_{Diel,Cation}$ | $E_{Diel,Anion}$ |                     |                                |
| [C <sub>3</sub> C <sub>1</sub> im][BC <sub>24</sub> H <sub>16</sub> O <sub>4</sub> ]                | 3.5089                                    | 6.0956         | -9.1931          | -18.4872        | -50.1735          | -67.6201         | -12.2912            | 0.0000                         |
| [C <sub>3</sub> C <sub>1</sub> im][(C <sub>4</sub> H <sub>9</sub> O) <sub>2</sub> PO <sub>2</sub> ] | 5.4957                                    | 5.9063         | -8.8396          | -12.8721        | -50.1735          | -79.8432         | -9.0917             | 0.0001                         |
| [C <sub>3</sub> C <sub>1</sub> im][(C <sub>4</sub> F <sub>9</sub> ) <sub>3</sub> PF <sub>3</sub> ]  | 3.2206                                    | 5.2683         | -7.0746          | -15.2128        | -50.1735          | -40.2288         | -8.8575             | 0.0001                         |
| [C <sub>3</sub> C <sub>1</sub> im][C <sub>9</sub> H <sub>20</sub> CO <sub>2</sub> ]                 | 6.1401                                    | 5.4118         | -8.9701          | -12.3416        | -50.1735          | -79.4828         | -8.2416             | 0.0003                         |
| [C <sub>3</sub> C <sub>1</sub> im][C <sub>5</sub> OC <sub>1</sub> SO <sub>4</sub> ]                 | 5.2419                                    | 6.0631         | -8.6876          | -10.3107        | -50.1735          | -82.0186         | -8.2235             | 0.0003                         |
| [C <sub>3</sub> C <sub>1</sub> im][C <sub>8</sub> H <sub>17</sub> SO <sub>4</sub> ]                 | 4.4809                                    | 5.1602         | -8.7979          | -12.4513        | -50.1735          | -72.5310         | -6.9910             | 0.0009                         |
| [C <sub>3</sub> C <sub>1</sub> im][BC <sub>14</sub> H <sub>8</sub> O <sub>6</sub> ]                 | 3.7298                                    | 4.6950         | -8.8461          | -13.2360        | -50.1735          | -65.6566         | -6.2219             | 0.0020                         |
| [C <sub>3</sub> C <sub>1</sub> im][(C <sub>2</sub> H <sub>5</sub> O) <sub>2</sub> PO <sub>2</sub> ] | 6.0903                                    | 5.1131         | -8.8386          | -8.7673         | -50.1735          | -79.4523         | -6.2024             | 0.0020                         |
| [C <sub>3</sub> C <sub>1</sub> im][C <sub>7</sub> H <sub>8</sub> SO <sub>3</sub> ]                  | 5.3906                                    | 4.7269         | -8.9242          | -8.9161         | -50.1735          | -78.1925         | -5.1786             | 0.0056                         |
| [C <sub>3</sub> C <sub>1</sub> im][C <sub>4</sub> H <sub>9</sub> OSO <sub>4</sub> ]                 | 5.1328                                    | 4.7923         | -8.7296          | -8.8624         | -50.1735          | -77.2128         | -5.1602             | 0.0057                         |
| [C <sub>3</sub> C <sub>1</sub> im][(CH <sub>3</sub> O) <sub>2</sub> PO <sub>2</sub> ]               | 6.5882                                    | 4.5114         | -8.8782          | -6.5559         | -50.1735          | -79.5814         | -4.6282             | 0.0098                         |
| [C <sub>3</sub> C <sub>1</sub> im][C <sub>3</sub> H <sub>7</sub> OSO <sub>4</sub> ]                 | 5.3949                                    | 4.5038         | -8.7219          | -7.8025         | -50.1735          | -77.0174         | -4.3956             | 0.0123                         |
| [C <sub>3</sub> C <sub>1</sub> im][(C <sub>6</sub> H <sub>5</sub> )CO <sub>2</sub> ]                | 6.1670                                    | 4.1889         | -9.0699          | -7.3359         | -50.1735          | -77.2645         | -3.8657             | 0.0209                         |
| [C <sub>3</sub> C <sub>1</sub> im][C <sub>4</sub> H <sub>9</sub> SO <sub>4</sub> ]                  | 4.9753                                    | 4.0807         | -8.7802          | -8.3620         | -50.1735          | -72.1540         | -3.3332             | 0.0357                         |
| [C <sub>3</sub> C <sub>1</sub> im][CH <sub>3</sub> CO <sub>2</sub> ]                                | 7.9350                                    | 3.8013         | -8.9881          | -4.1415         | -50.1735          | -79.6259         | -3.0006             | 0.0498                         |
| [C <sub>3</sub> C <sub>1</sub> im][CH <sub>3</sub> SO <sub>3</sub> ]                                | 6.9437                                    | 3.7995         | -8.8547          | -4.8251         | -50.1735          | -76.8542         | -2.7914             | 0.0613                         |
| [C <sub>3</sub> C <sub>1</sub> im][BCl <sub>4</sub> ]                                               | 3.1344                                    | 2.0498         | -10.3361         | -8.2480         | -50.1735          | -53.0390         | -2.0834             | 0.1245                         |
| [C <sub>3</sub> C <sub>1</sub> im][C <sub>2</sub> H <sub>5</sub> SO <sub>4</sub> ]                  | 5.4393                                    | 3.4380         | -8.7795          | -6.3398         | -50.1735          | -72.0671         | -2.0404             | 0.1300                         |
| [C <sub>3</sub> C <sub>1</sub> im][PF <sub>6</sub> ]                                                | 3.6555                                    | 1.3690         | -7.7856          | -4.1669         | -50.1735          | -56.5914         | -1.8504             | 0.1572                         |
| [C <sub>3</sub> C <sub>1</sub> im][C <sub>6</sub> H <sub>4</sub> BO <sub>8</sub> ]                  | 4.4590                                    | 3.5964         | -8.4147          | -8.6118         | -50.1735          | -61.0715         | -1.8039             | 0.1647                         |
| [C <sub>3</sub> C <sub>1</sub> im][(C <sub>2</sub> F <sub>5</sub> ) <sub>3</sub> PF <sub>3</sub> ]  | 2.9379                                    | 4.5782         | -7.2257          | -9.3812         | -50.1735          | -41.7902         | -1.7614             | 0.1718                         |
| [C <sub>3</sub> C <sub>1</sub> im][AsF <sub>6</sub> ]                                               | 3.4108                                    | 1.5275         | -7.7032          | -4.3887         | -50.1735          | -54.8906         | -1.7287             | 0.1775                         |
| [C <sub>3</sub> C <sub>1</sub> im][N(C <sub>2</sub> F <sub>5</sub> SO <sub>2</sub> ) <sub>2</sub> ] | 3.2803                                    | 3.8793         | -7.5722          | -9.4708         | -50.1735          | -50.3323         | -1.5851             | 0.2049                         |
| [C <sub>3</sub> C <sub>1</sub> im][ClO <sub>4</sub> ]                                               | 4.6555                                    | 1.1361         | -8.4254          | -3.8316         | -50.1735          | -61.6899         | -1.5843             | 0.2051                         |
| [C <sub>3</sub> C <sub>1</sub> im][C <sub>7</sub> H <sub>5</sub> O <sub>3</sub> ]                   | 4.8624                                    | 3.1660         | -8.9155          | -7.4036         | -50.1735          | -67.3577         | -1.5681             | 0.2084                         |
| [C <sub>3</sub> C <sub>1</sub> im][SbF <sub>6</sub> ]                                               | 3.1260                                    | 1.8436         | -7.6046          | -4.7483         | -50.1735          | -52.5788         | -1.3692             | 0.2543                         |
| [C <sub>3</sub> C <sub>1</sub> im][C(SO <sub>2</sub> CF <sub>3</sub> ) <sub>3</sub> ]               | 3.1321                                    | 3.7474         | -7.6283          | -9.5861         | -50.1735          | -48.5232         | -1.3558             | 0.2577                         |
| [C <sub>3</sub> C <sub>1</sub> im][CH <sub>3</sub> SO <sub>4</sub> ]                                | 5.7008                                    | 2.9406         | -8.7713          | -5.2800         | -50.1735          | -71.0882         | -1.2868             | 0.2762                         |
| [C <sub>3</sub> C <sub>1</sub> im][BF <sub>4</sub> ]                                                | 4.9236                                    | 1.2574         | -8.2709          | -3.4420         | -50.1735          | -62.9105         | -1.2628             | 0.2829                         |

|                                                                                                     |        |        |          |          |          |          |          |        |
|-----------------------------------------------------------------------------------------------------|--------|--------|----------|----------|----------|----------|----------|--------|
| [C <sub>3</sub> C <sub>1</sub> im][C <sub>3</sub> F <sub>7</sub> CO <sub>2</sub> ]                  | 4.4913 | 3.0589 | -7.7679  | -6.1987  | -50.1735 | -61.9876 | -0.9570  | 0.3840 |
| [C <sub>3</sub> C <sub>1</sub> im][CF <sub>3</sub> SO <sub>3</sub> ]                                | 4.3850 | 2.1848 | -8.0989  | -4.9705  | -50.1735 | -60.9237 | -0.8805  | 0.4146 |
| [C <sub>3</sub> C <sub>1</sub> im][PO <sub>2</sub> (C <sub>2</sub> F <sub>5</sub> ) <sub>2</sub> ]  | 3.6605 | 3.3519 | -7.5193  | -7.8049  | -50.1735 | -54.2051 | -0.7710  | 0.4626 |
| [C <sub>3</sub> C <sub>1</sub> im][CF <sub>3</sub> CO <sub>2</sub> ]                                | 5.1474 | 2.2501 | -8.1714  | -4.1957  | -50.1735 | -64.7784 | -0.7593  | 0.4680 |
| [C <sub>3</sub> C <sub>1</sub> im][SCN]                                                             | 5.6806 | 1.6143 | -9.6743  | -4.6866  | -50.1735 | -64.8886 | -0.6710  | 0.5112 |
| [C <sub>3</sub> C <sub>1</sub> im][CH(CF <sub>3</sub> SO <sub>2</sub> ) <sub>2</sub> ]              | 3.3328 | 3.2322 | -7.8085  | -8.0487  | -50.1735 | -51.9108 | -0.6559  | 0.5190 |
| [C <sub>3</sub> C <sub>1</sub> im][C(CN) <sub>3</sub> ]                                             | 4.4110 | 2.3714 | -8.7474  | -6.3373  | -50.1735 | -53.5982 | -0.5920  | 0.5532 |
| [C <sub>3</sub> C <sub>1</sub> im][N(CF <sub>3</sub> SO <sub>2</sub> ) <sub>2</sub> ]               | 3.3868 | 3.1711 | -7.7797  | -7.7290  | -50.1735 | -52.0438 | -0.5628  | 0.5696 |
| [C <sub>3</sub> C <sub>1</sub> im][B(C <sub>2</sub> O <sub>4</sub> ) <sub>2</sub> ]                 | 3.6351 | 2.4468 | -8.1815  | -6.9787  | -50.1735 | -51.5885 | -0.4751  | 0.6218 |
| [C <sub>3</sub> C <sub>1</sub> im][B(CN) <sub>4</sub> ]                                             | 3.9421 | 2.8062 | -8.7174  | -8.2004  | -50.1735 | -49.0681 | -0.4744  | 0.6222 |
| [C <sub>3</sub> C <sub>1</sub> im][NO <sub>3</sub> ]                                                | 6.3676 | 1.8424 | -8.6671  | -3.1107  | -50.1735 | -69.3606 | -0.1465  | 0.8637 |
| [C <sub>3</sub> C <sub>1</sub> im][NO <sub>2</sub> ]                                                | 7.5549 | 2.3345 | -8.8198  | -2.6832  | -50.1735 | -74.2878 | -0.0463  | 0.9547 |
| [C <sub>4</sub> C <sub>1</sub> im][BC <sub>24</sub> H <sub>16</sub> O <sub>4</sub> ]                | 3.7581 | 6.0855 | -10.1929 | -18.4729 | -50.0718 | -67.6201 | -12.6273 | 0.0000 |
| [C <sub>4</sub> C <sub>1</sub> im][(C <sub>4</sub> H <sub>9</sub> O) <sub>2</sub> PO <sub>2</sub> ] | 5.6273 | 5.8904 | -9.8616  | -12.8754 | -50.0718 | -79.8432 | -9.5256  | 0.0001 |
| [C <sub>4</sub> C <sub>1</sub> im][(C <sub>4</sub> F <sub>9</sub> ) <sub>3</sub> PF <sub>3</sub> ]  | 3.3997 | 5.1692 | -7.9952  | -15.2422 | -50.0718 | -40.2288 | -9.0542  | 0.0001 |
| [C <sub>4</sub> C <sub>1</sub> im][C <sub>9</sub> H <sub>20</sub> CO <sub>2</sub> ]                 | 6.2470 | 5.3839 | -9.9952  | -12.3451 | -50.0718 | -79.4828 | -8.6360  | 0.0002 |
| [C <sub>4</sub> C <sub>1</sub> im][C <sub>5</sub> OC <sub>1</sub> SO <sub>4</sub> ]                 | 5.4038 | 6.0349 | -9.7012  | -10.3143 | -50.0718 | -82.0186 | -8.6016  | 0.0002 |
| [C <sub>4</sub> C <sub>1</sub> im][C <sub>8</sub> H <sub>17</sub> SO <sub>4</sub> ]                 | 4.6585 | 5.1585 | -9.8194  | -12.4551 | -50.0718 | -72.5310 | -7.3872  | 0.0006 |
| [C <sub>4</sub> C <sub>1</sub> im][BC <sub>14</sub> H <sub>8</sub> O <sub>6</sub> ]                 | 3.9787 | 4.7124 | -9.8421  | -13.2213 | -50.0718 | -65.6566 | -6.6437  | 0.0013 |
| [C <sub>4</sub> C <sub>1</sub> im][(C <sub>2</sub> H <sub>5</sub> O) <sub>2</sub> PO <sub>2</sub> ] | 6.1863 | 5.1023 | -9.8538  | -8.7682  | -50.0718 | -79.4523 | -6.5105  | 0.0015 |
| [C <sub>4</sub> C <sub>1</sub> im][C <sub>7</sub> H <sub>8</sub> SO <sub>3</sub> ]                  | 5.5304 | 4.7308 | -9.9304  | -8.9105  | -50.0718 | -78.1925 | -5.4956  | 0.0041 |
| [C <sub>4</sub> C <sub>1</sub> im][C <sub>4</sub> H <sub>9</sub> OSO <sub>4</sub> ]                 | 5.2840 | 4.7946 | -9.7431  | -8.8643  | -50.0718 | -77.2128 | -5.4737  | 0.0042 |
| [C <sub>4</sub> C <sub>1</sub> im][(CH <sub>3</sub> O) <sub>2</sub> PO <sub>2</sub> ]               | 6.6286 | 4.5093 | -9.8885  | -6.5551  | -50.0718 | -79.5814 | -4.8226  | 0.0080 |
| [C <sub>4</sub> C <sub>1</sub> im][C <sub>3</sub> H <sub>7</sub> OSO <sub>4</sub> ]                 | 5.5218 | 4.5074 | -9.7332  | -7.8037  | -50.0718 | -77.0174 | -4.6616  | 0.0095 |
| [C <sub>4</sub> C <sub>1</sub> im][(C <sub>6</sub> H <sub>5</sub> )CO <sub>2</sub> ]                | 6.2630 | 4.1999 | -10.0732 | -7.3276  | -50.0718 | -77.2645 | -4.1220  | 0.0162 |
| [C <sub>4</sub> C <sub>1</sub> im][C <sub>4</sub> H <sub>9</sub> SO <sub>4</sub> ]                  | 5.1275 | 4.0996 | -9.7958  | -8.3637  | -50.0718 | -72.1540 | -3.6565  | 0.0258 |
| [C <sub>4</sub> C <sub>1</sub> im][CH <sub>3</sub> CO <sub>2</sub> ]                                | 7.8517 | 3.8263 | -9.9952  | -4.1415  | -50.0718 | -79.6259 | -3.0929  | 0.0454 |
| [C <sub>4</sub> C <sub>1</sub> im][CH <sub>3</sub> SO <sub>3</sub> ]                                | 6.9006 | 3.8194 | -9.8622  | -4.8250  | -50.0718 | -76.8542 | -2.9260  | 0.0536 |
| [C <sub>4</sub> C <sub>1</sub> im][BCl <sub>4</sub> ]                                               | 3.5109 | 2.1445 | -11.3510 | -8.2352  | -50.0718 | -53.0390 | -2.5620  | 0.0771 |
| [C <sub>4</sub> C <sub>1</sub> im][C <sub>2</sub> H <sub>5</sub> SO <sub>4</sub> ]                  | 5.5417 | 3.4749 | -9.7896  | -6.3389  | -50.0718 | -72.0671 | -2.2929  | 0.1010 |
| [C <sub>4</sub> C <sub>1</sub> im][PF <sub>6</sub> ]                                                | 3.9648 | 1.5395 | -8.8151  | -4.1862  | -50.0718 | -56.5914 | -2.0046  | 0.1347 |
| [C <sub>4</sub> C <sub>1</sub> im][C <sub>6</sub> H <sub>4</sub> BO <sub>8</sub> ]                  | 4.6824 | 3.6658 | -9.4128  | -8.6111  | -50.0718 | -61.0715 | -2.2688  | 0.1034 |
| [C <sub>4</sub> C <sub>1</sub> im][(C <sub>2</sub> F <sub>5</sub> ) <sub>3</sub> PF <sub>3</sub> ]  | 3.1953 | 4.4712 | -8.1912  | -9.4099  | -50.0718 | -41.7902 | -1.9878  | 0.1370 |

|                                                                                                     |        |        |          |          |          |          |          |        |
|-----------------------------------------------------------------------------------------------------|--------|--------|----------|----------|----------|----------|----------|--------|
| [C <sub>4</sub> C <sub>1</sub> im][AsF <sub>6</sub> ]                                               | 3.7548 | 1.6824 | -8.7351  | -4.4104  | -50.0718 | -54.8906 | -1.9229  | 0.1462 |
| [C <sub>4</sub> C <sub>1</sub> im][N(C <sub>2</sub> F <sub>5</sub> SO <sub>2</sub> ) <sub>2</sub> ] | 3.5239 | 3.8599 | -8.5268  | -9.4915  | -50.0718 | -50.3323 | -1.9700  | 0.1395 |
| [C <sub>4</sub> C <sub>1</sub> im][ClO <sub>4</sub> ]                                               | 4.7960 | 1.2984 | -9.4329  | -3.8300  | -50.0718 | -61.6899 | -1.7676  | 0.1707 |
| [C <sub>4</sub> C <sub>1</sub> im][C <sub>7</sub> H <sub>5</sub> O <sub>3</sub> ]                   | 5.0315 | 3.2098 | -9.9175  | -7.3953  | -50.0718 | -67.3577 | -1.9103  | 0.1480 |
| [C <sub>4</sub> C <sub>1</sub> im][SbF <sub>6</sub> ]                                               | 3.4929 | 1.9553 | -8.6361  | -4.7726  | -50.0718 | -52.5788 | -1.6571  | 0.1907 |
| [C <sub>4</sub> C <sub>1</sub> im][C(SO <sub>2</sub> CF <sub>3</sub> ) <sub>3</sub> ]               | 3.3906 | 3.7321 | -8.5899  | -9.6120  | -50.0718 | -48.5232 | -1.7691  | 0.1705 |
| [C <sub>4</sub> C <sub>1</sub> im][CH <sub>3</sub> SO <sub>4</sub> ]                                | 5.7608 | 2.9964 | -9.7778  | -5.2778  | -50.0718 | -71.0882 | -1.5146  | 0.2199 |
| [C <sub>4</sub> C <sub>1</sub> im][BF <sub>4</sub> ]                                                | 5.0328 | 1.4217 | -9.2839  | -3.4506  | -50.0718 | -62.9105 | -1.4387  | 0.2372 |
| [C <sub>4</sub> C <sub>1</sub> im][C <sub>3</sub> F <sub>7</sub> CO <sub>2</sub> ]                  | 4.6676 | 3.0675 | -8.7675  | -6.2190  | -50.0718 | -61.9876 | -1.2449  | 0.2880 |
| [C <sub>4</sub> C <sub>1</sub> im][CF <sub>3</sub> SO <sub>3</sub> ]                                | 4.5758 | 2.2598 | -9.1104  | -4.9808  | -50.0718 | -60.9237 | -1.1654  | 0.3118 |
| [C <sub>4</sub> C <sub>1</sub> im][PO <sub>2</sub> (C <sub>2</sub> F <sub>5</sub> ) <sub>2</sub> ]  | 3.8686 | 3.3233 | -8.5020  | -7.8301  | -50.0718 | -54.2051 | -1.1374  | 0.3207 |
| [C <sub>4</sub> C <sub>1</sub> im][CF <sub>3</sub> CO <sub>2</sub> ]                                | 5.2761 | 2.3257 | -9.1882  | -4.2060  | -50.0718 | -64.7784 | -0.9758  | 0.3769 |
| [C <sub>4</sub> C <sub>1</sub> im][SCN]                                                             | 5.7028 | 1.7478 | -10.6730 | -4.6747  | -50.0718 | -64.8886 | -0.9965  | 0.3692 |
| [C <sub>4</sub> C <sub>1</sub> im][CH(CF <sub>3</sub> SO <sub>2</sub> ) <sub>2</sub> ]              | 3.5966 | 3.2416 | -8.7932  | -8.0701  | -50.0718 | -51.9108 | -1.0930  | 0.3352 |
| [C <sub>4</sub> C <sub>1</sub> im][C(CN) <sub>3</sub> ]                                             | 4.6117 | 2.4571 | -9.7277  | -6.2960  | -50.0718 | -53.5982 | -1.0668  | 0.3441 |
| [C <sub>4</sub> C <sub>1</sub> im][N(CF <sub>3</sub> SO <sub>2</sub> ) <sub>2</sub> ]               | 3.6487 | 3.1844 | -8.7570  | -7.7428  | -50.0718 | -52.0438 | -0.9933  | 0.3704 |
| [C <sub>4</sub> C <sub>1</sub> im][B(C <sub>2</sub> O <sub>4</sub> ) <sub>2</sub> ]                 | 3.9326 | 2.5426 | -9.1770  | -6.9820  | -50.0718 | -51.5885 | -0.9369  | 0.3918 |
| [C <sub>4</sub> C <sub>1</sub> im][B(CN) <sub>4</sub> ]                                             | 4.1987 | 2.8737 | -9.6851  | -8.1279  | -50.0718 | -49.0681 | -1.0323  | 0.3562 |
| [C <sub>4</sub> C <sub>1</sub> im][NO <sub>3</sub> ]                                                | 6.2984 | 1.9618 | -9.6651  | -3.1033  | -50.0718 | -69.3606 | -0.3685  | 0.6918 |
| [C <sub>4</sub> C <sub>1</sub> im][NO <sub>2</sub> ]                                                | 7.3632 | 2.4317 | -9.8217  | -2.6795  | -50.0718 | -74.2878 | -0.2139  | 0.8075 |
| [C <sub>5</sub> C <sub>1</sub> im][BC <sub>24</sub> H <sub>16</sub> O <sub>4</sub> ]                | 3.9846 | 6.0731 | -11.2015 | -18.4640 | -50.0601 | -67.6201 | -12.0440 | 0.0000 |
| [C <sub>5</sub> C <sub>1</sub> im][(C <sub>4</sub> H <sub>9</sub> O) <sub>2</sub> PO <sub>2</sub> ] | 5.7421 | 5.8610 | -10.8870 | -12.8787 | -50.0601 | -79.8432 | -9.0830  | 0.0001 |
| [C <sub>5</sub> C <sub>1</sub> im][(C <sub>4</sub> F <sub>9</sub> ) <sub>3</sub> PF <sub>3</sub> ]  | 3.5767 | 5.0893 | -8.9214  | -15.2645 | -50.0601 | -40.2288 | -8.6144  | 0.0002 |
| [C <sub>5</sub> C <sub>1</sub> im][C <sub>9</sub> H <sub>20</sub> CO <sub>2</sub> ]                 | 6.3381 | 5.3500 | -11.0236 | -12.3482 | -50.0601 | -79.4828 | -8.1976  | 0.0003 |
| [C <sub>5</sub> C <sub>1</sub> im][C <sub>5</sub> OC <sub>1</sub> SO <sub>4</sub> ]                 | 5.5471 | 6.0008 | -10.7197 | -10.3185 | -50.0601 | -82.0186 | -8.2330  | 0.0003 |
| [C <sub>5</sub> C <sub>1</sub> im][C <sub>8</sub> H <sub>17</sub> SO <sub>4</sub> ]                 | 4.8168 | 5.1459 | -10.8443 | -12.4590 | -50.0601 | -72.5310 | -7.0317  | 0.0009 |
| [C <sub>5</sub> C <sub>1</sub> im][BC <sub>14</sub> H <sub>8</sub> O <sub>6</sub> ]                 | 4.2001 | 4.7243 | -10.8467 | -13.2113 | -50.0601 | -65.6566 | -6.3769  | 0.0017 |
| [C <sub>5</sub> C <sub>1</sub> im][(C <sub>2</sub> H <sub>5</sub> O) <sub>2</sub> PO <sub>2</sub> ] | 6.2680 | 5.0810 | -10.8745 | -8.7692  | -50.0601 | -79.4523 | -6.1877  | 0.0021 |
| [C <sub>5</sub> C <sub>1</sub> im][C <sub>7</sub> H <sub>8</sub> SO <sub>3</sub> ]                  | 5.6525 | 4.7271 | -10.9444 | -8.9070  | -50.0601 | -78.1925 | -5.2495  | 0.0053 |
| [C <sub>5</sub> C <sub>1</sub> im][C <sub>4</sub> H <sub>9</sub> OSO <sub>4</sub> ]                 | 5.4179 | 4.7890 | -10.7622 | -8.8667  | -50.0601 | -77.2128 | -5.2356  | 0.0053 |
| [C <sub>5</sub> C <sub>1</sub> im][(CH <sub>3</sub> O) <sub>2</sub> PO <sub>2</sub> ]               | 6.6653 | 4.4991 | -10.9062 | -6.5546  | -50.0601 | -79.5814 | -4.5628  | 0.0104 |
| [C <sub>5</sub> C <sub>1</sub> im][C <sub>3</sub> H <sub>7</sub> OSO <sub>4</sub> ]                 | 5.6359 | 4.5055 | -10.7508 | -7.8055  | -50.0601 | -77.0174 | -4.4637  | 0.0115 |
| [C <sub>5</sub> C <sub>1</sub> im][(C <sub>6</sub> H <sub>5</sub> )CO <sub>2</sub> ]                | 6.3461 | 4.2056 | -11.0859 | -7.3217  | -50.0601 | -77.2645 | -3.9380  | 0.0195 |

|                                                                                                     |        |        |          |          |          |          |          |        |
|-----------------------------------------------------------------------------------------------------|--------|--------|----------|----------|----------|----------|----------|--------|
| [C <sub>5</sub> C <sub>1</sub> im][C <sub>4</sub> H <sub>9</sub> SO <sub>4</sub> ]                  | 5.2612 | 4.1088 | -10.8169 | -8.3656  | -50.0601 | -72.1540 | -3.5553  | 0.0286 |
| [C <sub>5</sub> C <sub>1</sub> im][CH <sub>3</sub> CO <sub>2</sub> ]                                | 7.7889 | 3.8418 | -11.0118 | -4.1414  | -50.0601 | -79.6259 | -2.8892  | 0.0556 |
| [C <sub>5</sub> C <sub>1</sub> im][CH <sub>3</sub> SO <sub>3</sub> ]                                | 6.8759 | 3.8316 | -10.8786 | -4.8252  | -50.0601 | -76.8542 | -2.7831  | 0.0618 |
| [C <sub>5</sub> C <sub>1</sub> im][BCl <sub>4</sub> ]                                               | 3.8309 | 2.2338 | -12.3727 | -8.2259  | -50.0601 | -53.0390 | -2.9732  | 0.0511 |
| [C <sub>5</sub> C <sub>1</sub> im][C <sub>2</sub> H <sub>5</sub> SO <sub>4</sub> ]                  | 5.6355 | 3.5025 | -10.8071 | -6.3386  | -50.0601 | -72.0671 | -2.2981  | 0.1004 |
| [C <sub>5</sub> C <sub>1</sub> im][PF <sub>6</sub> ]                                                | 4.2324 | 1.6872 | -9.8445  | -4.1986  | -50.0601 | -56.5914 | -2.3854  | 0.0921 |
| [C <sub>5</sub> C <sub>1</sub> im][C <sub>6</sub> H <sub>4</sub> BO <sub>8</sub> ]                  | 4.8810 | 3.7262 | -10.4185 | -8.6124  | -50.0601 | -61.0715 | -2.4062  | 0.0902 |
| [C <sub>5</sub> C <sub>1</sub> im][(C <sub>2</sub> F <sub>5</sub> ) <sub>3</sub> PF <sub>3</sub> ]  | 3.4366 | 4.3895 | -9.1617  | -9.4309  | -50.0601 | -41.7902 | -2.0261  | 0.1318 |
| [C <sub>5</sub> C <sub>1</sub> im][AsF <sub>6</sub> ]                                               | 4.0491 | 1.8186 | -9.7656  | -4.4243  | -50.0601 | -54.8906 | -2.3394  | 0.0964 |
| [C <sub>5</sub> C <sub>1</sub> im][N(C <sub>2</sub> F <sub>5</sub> SO <sub>2</sub> ) <sub>2</sub> ] | 3.7465 | 3.8452 | -9.4918  | -9.5100  | -50.0601 | -50.3323 | -2.1010  | 0.1223 |
| [C <sub>5</sub> C <sub>1</sub> im][ClO <sub>4</sub> ]                                               | 4.9355 | 1.4380 | -10.4495 | -3.8286  | -50.0601 | -61.6899 | -2.1165  | 0.1205 |
| [C <sub>5</sub> C <sub>1</sub> im][C <sub>7</sub> H <sub>5</sub> O <sub>3</sub> ]                   | 5.1787 | 3.2457 | -10.9288 | -7.3898  | -50.0601 | -67.3577 | -2.0140  | 0.1335 |
| [C <sub>5</sub> C <sub>1</sub> im][SbF <sub>6</sub> ]                                               | 3.8059 | 2.0589 | -9.6655  | -4.7885  | -50.0601 | -52.5788 | -2.1442  | 0.1172 |
| [C <sub>5</sub> C <sub>1</sub> im][C(SO <sub>2</sub> CF <sub>3</sub> ) <sub>3</sub> ]               | 3.6267 | 3.7222 | -9.5597  | -9.6336  | -50.0601 | -48.5232 | -1.9490  | 0.1424 |
| [C <sub>5</sub> C <sub>1</sub> im][CH <sub>3</sub> SO <sub>4</sub> ]                                | 5.8237 | 3.0427 | -10.7931 | -5.2764  | -50.0601 | -71.0882 | -1.6008  | 0.2017 |
| [C <sub>5</sub> C <sub>1</sub> im][BF <sub>4</sub> ]                                                | 5.1472 | 1.5626 | -10.3040 | -3.4558  | -50.0601 | -62.9105 | -1.7725  | 0.1699 |
| [C <sub>5</sub> C <sub>1</sub> im][C <sub>3</sub> F <sub>7</sub> CO <sub>2</sub> ]                  | 4.8217 | 3.0755 | -9.7712  | -6.2343  | -50.0601 | -61.9876 | -1.4450  | 0.2358 |
| [C <sub>5</sub> C <sub>1</sub> im][CF <sub>3</sub> SO <sub>3</sub> ]                                | 4.7430 | 2.3245 | -10.1267 | -4.9882  | -50.0601 | -60.9237 | -1.5129  | 0.2203 |
| [C <sub>5</sub> C <sub>1</sub> im][PO <sub>2</sub> (C <sub>2</sub> F <sub>5</sub> ) <sub>2</sub> ]  | 4.0565 | 3.3025 | -9.4895  | -7.8493  | -50.0601 | -54.2051 | -1.3830  | 0.2508 |
| [C <sub>5</sub> C <sub>1</sub> im][CF <sub>3</sub> CO <sub>2</sub> ]                                | 5.3897 | 2.3889 | -10.2095 | -4.2135  | -50.0601 | -64.7784 | -1.2341  | 0.2911 |
| [C <sub>5</sub> C <sub>1</sub> im][SCN]                                                             | 5.7477 | 1.8611 | -11.6897 | -4.6716  | -50.0601 | -64.8886 | -1.3301  | 0.2644 |
| [C <sub>5</sub> C <sub>1</sub> im][CH(CF <sub>3</sub> SO <sub>2</sub> ) <sub>2</sub> ]              | 3.8324 | 3.2535 | -9.7846  | -8.0873  | -50.0601 | -51.9108 | -1.4146  | 0.2430 |
| [C <sub>5</sub> C <sub>1</sub> im][C(CN) <sub>3</sub> ]                                             | 4.7856 | 2.5285 | -10.7368 | -6.2753  | -50.0601 | -53.5982 | -1.5241  | 0.2178 |
| [C <sub>5</sub> C <sub>1</sub> im][N(CF <sub>3</sub> SO <sub>2</sub> ) <sub>2</sub> ]               | 3.8824 | 3.1985 | -9.7437  | -7.7553  | -50.0601 | -52.0438 | -1.3318  | 0.2640 |
| [C <sub>5</sub> C <sub>1</sub> im][B(C <sub>2</sub> O <sub>4</sub> ) <sub>2</sub> ]                 | 4.1906 | 2.6271 | -10.1806 | -6.9861  | -50.0601 | -51.5885 | -1.3836  | 0.2507 |
| [C <sub>5</sub> C <sub>1</sub> im][B(CN) <sub>4</sub> ]                                             | 4.4182 | 2.9307 | -10.6864 | -8.0836  | -50.0601 | -49.0681 | -1.4655  | 0.2310 |
| [C <sub>5</sub> C <sub>1</sub> im][NO <sub>3</sub> ]                                                | 6.2686 | 2.0603 | -10.6753 | -3.0973  | -50.0601 | -69.3606 | -0.6154  | 0.5404 |
| [C <sub>5</sub> C <sub>1</sub> im][NO <sub>2</sub> ]                                                | 7.2332 | 2.5093 | -10.8373 | -2.6784  | -50.0601 | -74.2878 | -0.3190  | 0.7268 |
| [C <sub>6</sub> C <sub>1</sub> im][BC <sub>24</sub> H <sub>16</sub> O <sub>4</sub> ]                | 4.1951 | 6.0601 | -12.2078 | -18.4550 | -50.1150 | -67.6201 | -10.8528 | 0.0000 |
| [C <sub>6</sub> C <sub>1</sub> im][(C <sub>4</sub> H <sub>9</sub> O) <sub>2</sub> PO <sub>2</sub> ] | 5.8520 | 5.8366 | -11.9098 | -12.8825 | -50.1150 | -79.8432 | -8.0903  | 0.0003 |
| [C <sub>6</sub> C <sub>1</sub> im][(C <sub>4</sub> F <sub>9</sub> ) <sub>3</sub> PF <sub>3</sub> ]  | 3.7433 | 5.0151 | -9.8537  | -15.2876 | -50.1150 | -40.2288 | -7.7032  | 0.0005 |
| [C <sub>6</sub> C <sub>1</sub> im][C <sub>9</sub> H <sub>20</sub> CO <sub>2</sub> ]                 | 6.4268 | 5.3238 | -12.0488 | -12.3513 | -50.1150 | -79.4828 | -7.2477  | 0.0007 |
| [C <sub>6</sub> C <sub>1</sub> im][C <sub>5</sub> OC <sub>1</sub> SO <sub>4</sub> ]                 | 5.6872 | 5.9756 | -11.7366 | -10.3232 | -50.1150 | -82.0186 | -7.3919  | 0.0006 |

|                                                                                                     |        |        |          |          |          |          |         |        |
|-----------------------------------------------------------------------------------------------------|--------|--------|----------|----------|----------|----------|---------|--------|
| [C <sub>6</sub> C <sub>1</sub> im][C <sub>8</sub> H <sub>17</sub> SO <sub>4</sub> ]                 | 4.9659 | 5.1351 | -11.8668 | -12.4632 | -50.1150 | -72.5310 | -6.1922 | 0.0020 |
| [C <sub>6</sub> C <sub>1</sub> im][BC <sub>14</sub> H <sub>8</sub> O <sub>6</sub> ]                 | 4.4039 | 4.7342 | -11.8503 | -13.2023 | -50.1150 | -65.6566 | -5.6398 | 0.0036 |
| [C <sub>6</sub> C <sub>1</sub> im][(C <sub>2</sub> H <sub>5</sub> O) <sub>2</sub> PO <sub>2</sub> ] | 6.3509 | 5.0675 | -11.8937 | -8.7707  | -50.1150 | -79.4523 | -5.4882 | 0.0041 |
| [C <sub>6</sub> C <sub>1</sub> im][C <sub>7</sub> H <sub>8</sub> SO <sub>3</sub> ]                  | 5.7717 | 4.7285 | -11.9574 | -8.9039  | -50.1150 | -78.1925 | -4.6535 | 0.0095 |
| [C <sub>6</sub> C <sub>1</sub> im][C <sub>4</sub> H <sub>9</sub> OSO <sub>4</sub> ]                 | 5.5491 | 4.7885 | -11.7798 | -8.8694  | -50.1150 | -77.2128 | -4.6490 | 0.0096 |
| [C <sub>6</sub> C <sub>1</sub> im][(CH <sub>3</sub> O) <sub>2</sub> PO <sub>2</sub> ]               | 6.7135 | 4.4980 | -11.9232 | -6.5544  | -50.1150 | -79.5814 | -4.0477 | 0.0175 |
| [C <sub>6</sub> C <sub>1</sub> im][C <sub>3</sub> H <sub>7</sub> OSO <sub>4</sub> ]                 | 5.7525 | 4.5106 | -11.7674 | -7.8077  | -50.1150 | -77.0174 | -3.9767 | 0.0187 |
| [C <sub>6</sub> C <sub>1</sub> im][(C <sub>6</sub> H <sub>5</sub> )CO <sub>2</sub> ]                | 6.4322 | 4.2157 | -12.0975 | -7.3159  | -50.1150 | -77.2645 | -3.4876 | 0.0306 |
| [C <sub>6</sub> C <sub>1</sub> im][C <sub>4</sub> H <sub>9</sub> SO <sub>4</sub> ]                  | 5.3908 | 4.1204 | -11.8364 | -8.3677  | -50.1150 | -72.1540 | -3.1782 | 0.0417 |
| [C <sub>6</sub> C <sub>1</sub> im][CH <sub>3</sub> CO <sub>2</sub> ]                                | 7.7576 | 3.8632 | -12.0278 | -4.1410  | -50.1150 | -79.6259 | -2.5403 | 0.0788 |
| [C <sub>6</sub> C <sub>1</sub> im][CH <sub>3</sub> SO <sub>3</sub> ]                                | 6.8801 | 3.8528 | -11.8950 | -4.8253  | -50.1150 | -76.8542 | -2.4965 | 0.0824 |
| [C <sub>6</sub> C <sub>1</sub> im][BCl <sub>4</sub> ]                                               | 4.1149 | 2.3085 | -13.3930 | -8.2172  | -50.1150 | -53.0390 | -3.2810 | 0.0376 |
| [C <sub>6</sub> C <sub>1</sub> im][C <sub>2</sub> H <sub>5</sub> SO <sub>4</sub> ]                  | 5.7349 | 3.5326 | -11.8241 | -6.3385  | -50.1150 | -72.0671 | -2.1392 | 0.1178 |
| [C <sub>6</sub> C <sub>1</sub> im][PF <sub>6</sub> ]                                                | 4.4769 | 1.8112 | -10.8737 | -4.2109  | -50.1150 | -56.5914 | -2.8394 | 0.0585 |
| [C <sub>6</sub> C <sub>1</sub> im][C <sub>6</sub> H <sub>4</sub> BO <sub>8</sub> ]                  | 5.0703 | 3.7842 | -11.4244 | -8.6147  | -50.1150 | -61.0715 | -2.2873 | 0.1015 |
| [C <sub>6</sub> C <sub>1</sub> im][(C <sub>2</sub> F <sub>5</sub> ) <sub>3</sub> PF <sub>3</sub> ]  | 3.6582 | 4.3155 | -10.1368 | -9.4516  | -50.1150 | -41.7902 | -1.8997 | 0.1496 |
| [C <sub>6</sub> C <sub>1</sub> im][AsF <sub>6</sub> ]                                               | 4.3138 | 1.9322 | -10.7952 | -4.4378  | -50.1150 | -54.8906 | -2.8260 | 0.0592 |
| [C <sub>6</sub> C <sub>1</sub> im][N(C <sub>2</sub> F <sub>5</sub> SO <sub>2</sub> ) <sub>2</sub> ] | 3.9525 | 3.8321 | -10.4599 | -9.5265  | -50.1150 | -50.3323 | -2.0176 | 0.1330 |
| [C <sub>6</sub> C <sub>1</sub> im][ClO <sub>4</sub> ]                                               | 5.0831 | 1.5610 | -11.4672 | -3.8275  | -50.1150 | -61.6899 | -2.5098 | 0.0813 |
| [C <sub>6</sub> C <sub>1</sub> im][C <sub>7</sub> H <sub>5</sub> O <sub>3</sub> ]                   | 5.3188 | 3.2800 | -11.9394 | -7.3846  | -50.1150 | -67.3577 | -1.9403 | 0.1437 |
| [C <sub>6</sub> C <sub>1</sub> im][SbF <sub>6</sub> ]                                               | 4.0841 | 2.1450 | -10.6938 | -4.8035  | -50.1150 | -52.5788 | -2.6900 | 0.0679 |
| [C <sub>6</sub> C <sub>1</sub> im][C(SO <sub>2</sub> CF <sub>3</sub> ) <sub>3</sub> ]               | 3.8439 | 3.7125 | -10.5332 | -9.6540  | -50.1150 | -48.5232 | -1.9246 | 0.1459 |
| [C <sub>6</sub> C <sub>1</sub> im][CH <sub>3</sub> SO <sub>4</sub> ]                                | 5.9015 | 3.0908 | -11.8085 | -5.2753  | -50.1150 | -71.0882 | -1.5849 | 0.2050 |
| [C <sub>6</sub> C <sub>1</sub> im][BF <sub>4</sub> ]                                                | 5.2747 | 1.6870 | -11.3270 | -3.4625  | -50.1150 | -62.9105 | -2.1500 | 0.1165 |
| [C <sub>6</sub> C <sub>1</sub> im][C <sub>3</sub> F <sub>7</sub> CO <sub>2</sub> ]                  | 4.9647 | 3.0859 | -10.7752 | -6.2483  | -50.1150 | -61.9876 | -1.5537 | 0.2115 |
| [C <sub>6</sub> C <sub>1</sub> im][CF <sub>3</sub> SO <sub>3</sub> ]                                | 4.9012 | 2.3832 | -11.1424 | -4.9948  | -50.1150 | -60.9237 | -1.8489 | 0.1574 |
| [C <sub>6</sub> C <sub>1</sub> im][PO <sub>2</sub> (C <sub>2</sub> F <sub>5</sub> ) <sub>2</sub> ]  | 4.2290 | 3.2860 | -10.4790 | -7.8672  | -50.1150 | -54.2051 | -1.5111 | 0.2207 |
| [C <sub>6</sub> C <sub>1</sub> im][CF <sub>3</sub> CO <sub>2</sub> ]                                | 5.5027 | 2.4464 | -11.2300 | -4.2203  | -50.1150 | -64.7784 | -1.4807 | 0.2275 |
| [C <sub>6</sub> C <sub>1</sub> im][SCN]                                                             | 5.8223 | 1.9649 | -12.6986 | -4.6601  | -50.1150 | -64.8886 | -1.6235 | 0.1972 |
| [C <sub>6</sub> C <sub>1</sub> im][CH(CF <sub>3</sub> SO <sub>2</sub> ) <sub>2</sub> ]              | 4.0481 | 3.2642 | -10.7777 | -8.1034  | -50.1150 | -51.9108 | -1.6067 | 0.2006 |
| [C <sub>6</sub> C <sub>1</sub> im][C(CN) <sub>3</sub> ]                                             | 4.9524 | 2.5923 | -11.7357 | -6.2437  | -50.1150 | -53.5982 | -1.9075 | 0.1484 |
| [C <sub>6</sub> C <sub>1</sub> im][N(CF <sub>3</sub> SO <sub>2</sub> ) <sub>2</sub> ]               | 4.0968 | 3.2114 | -10.7316 | -7.7659  | -50.1150 | -52.0438 | -1.5558 | 0.2110 |
| [C <sub>6</sub> C <sub>1</sub> im][B(C <sub>2</sub> O <sub>4</sub> ) <sub>2</sub> ]                 | 4.4259 | 2.7009 | -11.1848 | -6.9906  | -50.1150 | -51.5885 | -1.7487 | 0.1740 |

|                                                                                                      |        |        |          |          |          |          |         |        |
|------------------------------------------------------------------------------------------------------|--------|--------|----------|----------|----------|----------|---------|--------|
| [C <sub>6</sub> C <sub>1</sub> im][B(CN) <sub>4</sub> ]                                              | 4.6213 | 2.9803 | -11.6784 | -8.0308  | -50.1150 | -49.0681 | -1.7547 | 0.1730 |
| [C <sub>6</sub> C <sub>1</sub> im][NO <sub>3</sub> ]                                                 | 6.2788 | 2.1515 | -11.6871 | -3.0917  | -50.1150 | -69.3606 | -0.8581 | 0.4240 |
| [C <sub>6</sub> C <sub>1</sub> im][NO <sub>2</sub> ]                                                 | 7.1636 | 2.5847 | -11.8493 | -2.6725  | -50.1150 | -74.2878 | -0.3979 | 0.6717 |
| [C <sub>7</sub> C <sub>1</sub> im][BC <sub>24</sub> H <sub>16</sub> O <sub>4</sub> ]                 | 4.3934 | 6.0479 | -13.2275 | -18.4470 | -50.1751 | -67.6201 | -9.6649 | 0.0001 |
| [C <sub>7</sub> C <sub>1</sub> im][[(C <sub>4</sub> H <sub>9</sub> O) <sub>2</sub> PO <sub>2</sub> ] | 5.9601 | 5.8208 | -12.9443 | -12.8854 | -50.1751 | -79.8432 | -7.1317 | 0.0008 |
| [C <sub>7</sub> C <sub>1</sub> im][[(C <sub>4</sub> F <sub>9</sub> ) <sub>3</sub> PF <sub>3</sub> ]  | 3.9027 | 4.9449 | -10.8013 | -15.3085 | -50.1751 | -40.2288 | -6.7920 | 0.0011 |
| [C <sub>7</sub> C <sub>1</sub> im][C <sub>9</sub> H <sub>20</sub> CO <sub>2</sub> ]                  | 6.5074 | 5.2979 | -13.0858 | -12.3538 | -50.1751 | -79.4828 | -6.3298 | 0.0018 |
| [C <sub>7</sub> C <sub>1</sub> im][C <sub>5</sub> OC <sub>1</sub> SO <sub>4</sub> ]                  | 5.8318 | 5.9692 | -12.7653 | -10.3272 | -50.1751 | -82.0186 | -6.5971 | 0.0014 |
| [C <sub>7</sub> C <sub>1</sub> im][C <sub>8</sub> H <sub>17</sub> SO <sub>4</sub> ]                  | 5.1132 | 5.1340 | -12.9007 | -12.4666 | -50.1751 | -72.5310 | -5.4010 | 0.0045 |
| [C <sub>7</sub> C <sub>1</sub> im][BC <sub>14</sub> H <sub>8</sub> O <sub>6</sub> ]                  | 4.5974 | 4.7477 | -12.8676 | -13.1940 | -50.1751 | -65.6566 | -4.9350 | 0.0072 |
| [C <sub>7</sub> C <sub>1</sub> im][[(C <sub>2</sub> H <sub>5</sub> O) <sub>2</sub> PO <sub>2</sub> ] | 6.4369 | 5.0639 | -12.9250 | -8.7716  | -50.1751 | -79.4523 | -4.8432 | 0.0079 |
| [C <sub>7</sub> C <sub>1</sub> im][C <sub>7</sub> H <sub>8</sub> SO <sub>3</sub> ]                   | 5.8930 | 4.7404 | -12.9834 | -8.9007  | -50.1751 | -78.1925 | -4.1114 | 0.0164 |
| [C <sub>7</sub> C <sub>1</sub> im][C <sub>4</sub> H <sub>9</sub> OSO <sub>4</sub> ]                  | 5.6848 | 4.8026 | -12.8095 | -8.8716  | -50.1751 | -77.2128 | -4.1181 | 0.0163 |
| [C <sub>7</sub> C <sub>1</sub> im][[(CH <sub>3</sub> O) <sub>2</sub> PO <sub>2</sub> ]               | 6.7717 | 4.5072 | -12.9530 | -6.5539  | -50.1751 | -79.5814 | -3.5962 | 0.0274 |
| [C <sub>7</sub> C <sub>1</sub> im][C <sub>3</sub> H <sub>7</sub> OSO <sub>4</sub> ]                  | 5.8767 | 4.5314 | -12.7963 | -7.8093  | -50.1751 | -77.0174 | -3.5482 | 0.0288 |
| [C <sub>7</sub> C <sub>1</sub> im][[(C <sub>6</sub> H <sub>5</sub> )CO <sub>2</sub> ]                | 6.5148 | 4.2261 | -13.1230 | -7.3104  | -50.1751 | -77.2645 | -3.0832 | 0.0458 |
| [C <sub>7</sub> C <sub>1</sub> im][C <sub>4</sub> H <sub>9</sub> SO <sub>4</sub> ]                   | 5.5228 | 4.1424 | -12.8679 | -8.3692  | -50.1751 | -72.1540 | -2.8509 | 0.0578 |
| [C <sub>7</sub> C <sub>1</sub> im][CH <sub>3</sub> CO <sub>2</sub> ]                                 | 7.7417 | 3.8842 | -13.0575 | -4.1404  | -50.1751 | -79.6259 | -2.2516 | 0.1052 |
| [C <sub>7</sub> C <sub>1</sub> im][CH <sub>3</sub> SO <sub>3</sub> ]                                 | 6.9081 | 3.8869 | -12.9243 | -4.8251  | -50.1751 | -76.8542 | -2.2808 | 0.1022 |
| [C <sub>7</sub> C <sub>1</sub> im][BCl <sub>4</sub> ]                                                | 4.3789 | 2.3796 | -14.4265 | -8.2095  | -50.1751 | -53.0390 | -3.5609 | 0.0284 |
| [C <sub>7</sub> C <sub>1</sub> im][C <sub>2</sub> H <sub>5</sub> SO <sub>4</sub> ]                   | 5.8437 | 3.5735 | -12.8536 | -6.3381  | -50.1751 | -72.0671 | -2.0224 | 0.1323 |
| [C <sub>7</sub> C <sub>1</sub> im][PF <sub>6</sub> ]                                                 | 4.7109 | 1.9278 | -11.9142 | -4.2213  | -50.1751 | -56.5914 | -3.2473 | 0.0389 |
| [C <sub>7</sub> C <sub>1</sub> im][C <sub>6</sub> H <sub>4</sub> BO <sub>8</sub> ]                   | 5.2579 | 3.8501 | -12.4437 | -8.6171  | -50.1751 | -61.0715 | -2.1856 | 0.1124 |
| [C <sub>7</sub> C <sub>1</sub> im][[(C <sub>2</sub> F <sub>5</sub> ) <sub>3</sub> PF <sub>3</sub> ]  | 3.8671 | 4.2481 | -11.1266 | -9.4699  | -50.1751 | -41.7902 | -1.8441 | 0.1582 |
| [C <sub>7</sub> C <sub>1</sub> im][AsF <sub>6</sub> ]                                                | 4.5635 | 2.0383 | -11.8360 | -4.4492  | -50.1751 | -54.8906 | -3.2678 | 0.0381 |
| [C <sub>7</sub> C <sub>1</sub> im][N(C <sub>2</sub> F <sub>5</sub> SO <sub>2</sub> ) <sub>2</sub> ]  | 4.1481 | 3.8229 | -11.4435 | -9.5415  | -50.1751 | -50.3323 | -1.9655 | 0.1401 |
| [C <sub>7</sub> C <sub>1</sub> im][ClO <sub>4</sub> ]                                                | 5.2399 | 1.6817 | -12.4980 | -3.8263  | -50.1751 | -61.6899 | -2.8565 | 0.0575 |
| [C <sub>7</sub> C <sub>1</sub> im][C <sub>7</sub> H <sub>5</sub> O <sub>3</sub> ]                    | 5.4521 | 3.3132 | -12.9637 | -7.3798  | -50.1751 | -67.3577 | -1.8939 | 0.1505 |
| [C <sub>7</sub> C <sub>1</sub> im][SbF <sub>6</sub> ]                                                | 4.3435 | 2.2263 | -11.7331 | -4.8162  | -50.1751 | -52.5788 | -3.1954 | 0.0410 |
| [C <sub>7</sub> C <sub>1</sub> im][C(SO <sub>2</sub> CF <sub>3</sub> ) <sub>3</sub> ]                | 4.0501 | 3.7073 | -11.5219 | -9.6724  | -50.1751 | -48.5232 | -1.9297 | 0.1452 |
| [C <sub>7</sub> C <sub>1</sub> im][CH <sub>3</sub> SO <sub>4</sub> ]                                 | 5.9944 | 3.1486 | -12.8369 | -5.2740  | -50.1751 | -71.0882 | -1.6005 | 0.2018 |
| [C <sub>7</sub> C <sub>1</sub> im][BF <sub>4</sub> ]                                                 | 5.4154 | 1.8100 | -12.3626 | -3.4683  | -50.1751 | -62.9105 | -2.4857 | 0.0833 |
| [C <sub>7</sub> C <sub>1</sub> im][C <sub>3</sub> F <sub>7</sub> CO <sub>2</sub> ]                   | 5.0983 | 3.0945 | -11.7922 | -6.2604  | -50.1751 | -61.9876 | -1.6841 | 0.1856 |



|                                                                                                     |        |        |          |          |          |          |         |        |
|-----------------------------------------------------------------------------------------------------|--------|--------|----------|----------|----------|----------|---------|--------|
| [C <sub>7</sub> C <sub>1</sub> im][CF <sub>3</sub> SO <sub>3</sub> ]                                | 5.0563 | 2.4421 | -12.1706 | -5.0003  | -50.1751 | -60.9237 | -2.1734 | 0.1138 |
| [C <sub>7</sub> C <sub>1</sub> im][PO <sub>2</sub> (C <sub>2</sub> F <sub>5</sub> ) <sub>2</sub> ]  | 4.3886 | 3.2688 | -11.4823 | -7.8828  | -50.1751 | -54.2051 | -1.6733 | 0.1876 |
| [C <sub>7</sub> C <sub>1</sub> im][CF <sub>3</sub> CO <sub>2</sub> ]                                | 5.6138 | 2.4987 | -12.2628 | -4.2261  | -50.1751 | -64.7784 | -1.7332 | 0.1767 |
| [C <sub>7</sub> C <sub>1</sub> im][SCN]                                                             | 5.9135 | 2.0650 | -13.7226 | -4.6496  | -50.1751 | -64.8886 | -1.9052 | 0.1488 |
| [C <sub>7</sub> C <sub>1</sub> im][CH(CF <sub>3</sub> SO <sub>2</sub> ) <sub>2</sub> ]              | 4.2519 | 3.2780 | -11.7849 | -8.1176  | -50.1751 | -51.9108 | -1.8139 | 0.1630 |
| [C <sub>7</sub> C <sub>1</sub> im][C(CN) <sub>3</sub> ]                                             | 5.1137 | 2.6529 | -12.7513 | -6.2170  | -50.1751 | -53.5982 | -2.2853 | 0.1017 |
| [C <sub>7</sub> C <sub>1</sub> im][N(CF <sub>3</sub> SO <sub>2</sub> ) <sub>2</sub> ]               | 4.3001 | 3.2276 | -11.7342 | -7.7753  | -50.1751 | -52.0438 | -1.7934 | 0.1664 |
| [C <sub>7</sub> C <sub>1</sub> im][B(C <sub>2</sub> O <sub>4</sub> ) <sub>2</sub> ]                 | 4.6501 | 2.7757 | -12.2029 | -6.9950  | -50.1751 | -51.5885 | -2.0941 | 0.1232 |
| [C <sub>7</sub> C <sub>1</sub> im][B(CN) <sub>4</sub> ]                                             | 4.8139 | 3.0280 | -12.6881 | -7.9849  | -50.1751 | -49.0681 | -2.0545 | 0.1282 |
| [C <sub>7</sub> C <sub>1</sub> im][NO <sub>3</sub> ]                                                | 6.3178 | 2.2436 | -12.7128 | -3.0863  | -50.1751 | -69.3606 | -1.1050 | 0.3312 |
| [C <sub>7</sub> C <sub>1</sub> im][NO <sub>2</sub> ]                                                | 7.1329 | 2.6606 | -12.8756 | -2.6676  | -50.1751 | -74.2878 | -0.5191 | 0.5950 |
| [C <sub>8</sub> C <sub>1</sub> im][BC <sub>24</sub> H <sub>16</sub> O <sub>4</sub> ]                | 4.5857 | 6.0407 | -14.2395 | -18.4403 | -50.2776 | -67.6201 | -8.2193 | 0.0003 |
| [C <sub>8</sub> C <sub>1</sub> im][(C <sub>4</sub> H <sub>9</sub> O) <sub>2</sub> PO <sub>2</sub> ] | 6.0761 | 5.8089 | -13.9693 | -12.8884 | -50.2776 | -79.8432 | -5.9565 | 0.0026 |
| [C <sub>8</sub> C <sub>1</sub> im][(C <sub>4</sub> F <sub>9</sub> ) <sub>3</sub> PF <sub>3</sub> ]  | 4.0571 | 4.8827 | -11.7435 | -15.3263 | -50.2776 | -40.2288 | -5.6385 | 0.0036 |
| [C <sub>8</sub> C <sub>1</sub> im][C <sub>9</sub> H <sub>20</sub> CO <sub>2</sub> ]                 | 6.6023 | 5.2855 | -14.1134 | -12.3562 | -50.2776 | -79.4828 | -5.2410 | 0.0053 |
| [C <sub>8</sub> C <sub>1</sub> im][C <sub>5</sub> OC <sub>1</sub> SO <sub>4</sub> ]                 | 5.9782 | 5.9623 | -13.7851 | -10.3314 | -50.2776 | -82.0186 | -5.5990 | 0.0037 |
| [C <sub>8</sub> C <sub>1</sub> im][C <sub>8</sub> H <sub>17</sub> SO <sub>4</sub> ]                 | 5.2611 | 5.1320 | -13.9252 | -12.4702 | -50.2776 | -72.5310 | -4.4157 | 0.0121 |
| [C <sub>8</sub> C <sub>1</sub> im][BC <sub>14</sub> H <sub>8</sub> O <sub>6</sub> ]                 | 4.7846 | 4.7616 | -13.8775 | -13.1872 | -50.2776 | -65.6566 | -4.0346 | 0.0177 |
| [C <sub>8</sub> C <sub>1</sub> im][(C <sub>2</sub> H <sub>5</sub> O) <sub>2</sub> PO <sub>2</sub> ] | 6.5343 | 5.0633 | -13.9478 | -8.7727  | -50.2776 | -79.4523 | -4.0658 | 0.0171 |
| [C <sub>8</sub> C <sub>1</sub> im][C <sub>7</sub> H <sub>8</sub> SO <sub>3</sub> ]                  | 6.0202 | 4.7530 | -14.0015 | -8.8982  | -50.2776 | -78.1925 | -3.4414 | 0.0320 |
| [C <sub>8</sub> C <sub>1</sub> im][C <sub>4</sub> H <sub>9</sub> OSO <sub>4</sub> ]                 | 5.8232 | 4.8140 | -13.8305 | -8.8740  | -50.2776 | -77.2128 | -3.4473 | 0.0318 |
| [C <sub>8</sub> C <sub>1</sub> im][(CH <sub>3</sub> O) <sub>2</sub> PO <sub>2</sub> ]               | 6.8470 | 4.5187 | -13.9749 | -6.5537  | -50.2776 | -79.5814 | -3.0695 | 0.0464 |
| [C <sub>8</sub> C <sub>1</sub> im][C <sub>3</sub> H <sub>7</sub> OSO <sub>4</sub> ]                 | 6.0063 | 4.5496 | -13.8167 | -7.8112  | -50.2776 | -77.0174 | -3.0057 | 0.0495 |
| [C <sub>8</sub> C <sub>1</sub> im][(C <sub>6</sub> H <sub>5</sub> )CO <sub>2</sub> ]                | 6.6128 | 4.2444 | -14.1409 | -7.3056  | -50.2776 | -77.2645 | -2.6116 | 0.0734 |
| [C <sub>8</sub> C <sub>1</sub> im][C <sub>4</sub> H <sub>9</sub> SO <sub>4</sub> ]                  | 5.6577 | 4.1613 | -13.8907 | -8.3709  | -50.2776 | -72.1540 | -2.4170 | 0.0892 |
| [C <sub>8</sub> C <sub>1</sub> im][CH <sub>3</sub> CO <sub>2</sub> ]                                | 7.7600 | 3.9103 | -14.0798 | -4.1398  | -50.2776 | -79.6259 | -1.9597 | 0.1409 |
| [C <sub>8</sub> C <sub>1</sub> im][CH <sub>3</sub> SO <sub>3</sub> ]                                | 6.9605 | 3.9183 | -13.9461 | -4.8250  | -50.2776 | -76.8542 | -2.0293 | 0.1314 |
| [C <sub>8</sub> C <sub>1</sub> im][BCl <sub>4</sub> ]                                               | 4.6184 | 2.4390 | -15.4515 | -8.2030  | -50.2776 | -53.0390 | -3.7643 | 0.0232 |
| [C <sub>8</sub> C <sub>1</sub> im][C <sub>2</sub> H <sub>5</sub> SO <sub>4</sub> ]                  | 5.9602 | 3.6093 | -13.8750 | -6.3381  | -50.2776 | -72.0671 | -1.8440 | 0.1582 |
| [C <sub>8</sub> C <sub>1</sub> im][PF <sub>6</sub> ]                                                | 4.9272 | 2.0251 | -12.9438 | -4.2293  | -50.2776 | -56.5914 | -3.6332 | 0.0264 |
| [C <sub>8</sub> C <sub>1</sub> im][C <sub>6</sub> H <sub>4</sub> BO <sub>8</sub> ]                  | 5.4403 | 3.9089 | -13.4553 | -8.6203  | -50.2776 | -61.0715 | -1.9519 | 0.1420 |
| [C <sub>8</sub> C <sub>1</sub> im][(C <sub>2</sub> F <sub>5</sub> ) <sub>3</sub> PF <sub>3</sub> ]  | 4.0632 | 4.1887 | -12.1095 | -9.4850  | -50.2776 | -41.7902 | -1.7114 | 0.1806 |
| [C <sub>8</sub> C <sub>1</sub> im][AsF <sub>6</sub> ]                                               | 4.7920 | 2.1266 | -12.8656 | -4.4579  | -50.2776 | -54.8906 | -3.6812 | 0.0252 |

|                                                                                                     |        |        |          |          |          |          |         |        |
|-----------------------------------------------------------------------------------------------------|--------|--------|----------|----------|----------|----------|---------|--------|
| [C <sub>8</sub> C <sub>1</sub> im][N(C <sub>2</sub> F <sub>5</sub> SO <sub>2</sub> ) <sub>2</sub> ] | 4.3339 | 3.8142 | -12.4226 | -9.5556  | -50.2776 | -50.3323 | -1.7975 | 0.1657 |
| [C <sub>8</sub> C <sub>1</sub> im][ClO <sub>4</sub> ]                                               | 5.3964 | 1.7844 | -13.5208 | -3.8253  | -50.2776 | -61.6899 | -3.1914 | 0.0411 |
| [C <sub>8</sub> C <sub>1</sub> im][C <sub>7</sub> H <sub>5</sub> O <sub>3</sub> ]                   | 5.5900 | 3.3479 | -13.9804 | -7.3759  | -50.2776 | -67.3577 | -1.7796 | 0.1687 |
| [C <sub>8</sub> C <sub>1</sub> im][SbF <sub>6</sub> ]                                               | 4.5796 | 2.2938 | -12.7613 | -4.8260  | -50.2776 | -52.5788 | -3.6625 | 0.0257 |
| [C <sub>8</sub> C <sub>1</sub> im][C(SO <sub>2</sub> CF <sub>3</sub> ) <sub>3</sub> ]               | 4.2447 | 3.7017 | -12.5047 | -9.6890  | -50.2776 | -48.5232 | -1.8193 | 0.1621 |
| [C <sub>8</sub> C <sub>1</sub> im][CH <sub>3</sub> SO <sub>4</sub> ]                                | 6.0991 | 3.1996 | -13.8577 | -5.2732  | -50.2776 | -71.0882 | -1.5774 | 0.2065 |
| [C <sub>8</sub> C <sub>1</sub> im][BF <sub>4</sub> ]                                                | 5.5598 | 1.9144 | -13.3892 | -3.4725  | -50.2776 | -62.9105 | -2.8122 | 0.0601 |
| [C <sub>8</sub> C <sub>1</sub> im][C <sub>3</sub> F <sub>7</sub> CO <sub>2</sub> ]                  | 5.2351 | 3.1086 | -12.8011 | -6.2709  | -50.2776 | -61.9876 | -1.7620 | 0.1717 |
| [C <sub>8</sub> C <sub>1</sub> im][CF <sub>3</sub> SO <sub>3</sub> ]                                | 5.2095 | 2.4943 | -13.1902 | -5.0049  | -50.2776 | -60.9237 | -2.4614 | 0.0853 |
| [C <sub>8</sub> C <sub>1</sub> im][PO <sub>2</sub> (C <sub>2</sub> F <sub>5</sub> ) <sub>2</sub> ]  | 4.5463 | 3.2596 | -12.4783 | -7.8962  | -50.2776 | -54.2051 | -1.7643 | 0.1713 |
| [C <sub>8</sub> C <sub>1</sub> im][CF <sub>3</sub> CO <sub>2</sub> ]                                | 5.7328 | 2.5484 | -13.2866 | -4.2310  | -50.2776 | -64.7784 | -1.9655 | 0.1401 |
| [C <sub>8</sub> C <sub>1</sub> im][SCN]                                                             | 6.0178 | 2.1523 | -14.7437 | -4.6451  | -50.2776 | -64.8886 | -2.1675 | 0.1145 |
| [C <sub>8</sub> C <sub>1</sub> im][CH(CF <sub>3</sub> SO <sub>2</sub> ) <sub>2</sub> ]              | 4.4449 | 3.2904 | -12.7850 | -8.1301  | -50.2776 | -51.9108 | -1.9319 | 0.1449 |
| [C <sub>8</sub> C <sub>1</sub> im][C(CN) <sub>3</sub> ]                                             | 5.2701 | 2.7055 | -13.7675 | -6.1994  | -50.2776 | -53.5982 | -2.6055 | 0.0739 |
| [C <sub>8</sub> C <sub>1</sub> im][N(CF <sub>3</sub> SO <sub>2</sub> ) <sub>2</sub> ]               | 4.4918 | 3.2412 | -12.7311 | -7.7845  | -50.2776 | -52.0438 | -1.9487 | 0.1425 |
| [C <sub>8</sub> C <sub>1</sub> im][B(C <sub>2</sub> O <sub>4</sub> ) <sub>2</sub> ]                 | 4.8596 | 2.8400 | -13.2137 | -7.0000  | -50.2776 | -51.5885 | -2.3574 | 0.0947 |
| [C <sub>8</sub> C <sub>1</sub> im][B(CN) <sub>4</sub> ]                                             | 4.9953 | 3.0686 | -13.6990 | -7.9502  | -50.2776 | -49.0681 | -2.2728 | 0.1030 |
| [C <sub>8</sub> C <sub>1</sub> im][NO <sub>3</sub> ]                                                | 6.3821 | 2.3238 | -13.7317 | -3.0816  | -50.2776 | -69.3606 | -1.3510 | 0.2590 |
| [C <sub>8</sub> C <sub>1</sub> im][NO <sub>2</sub> ]                                                | 7.1421 | 2.7282 | -13.8964 | -2.6642  | -50.2776 | -74.2878 | -0.6541 | 0.5199 |
| [C <sub>9</sub> C <sub>1</sub> im][BC <sub>24</sub> H <sub>16</sub> O <sub>4</sub> ]                | 4.7670 | 6.0331 | -15.2694 | -18.4336 | -50.3203 | -67.6201 | -7.4356 | 0.0006 |
| [C <sub>9</sub> C <sub>1</sub> im][(C <sub>4</sub> H <sub>9</sub> O) <sub>2</sub> PO <sub>2</sub> ] | 6.1731 | 5.7974 | -15.0115 | -12.8911 | -50.3203 | -79.8432 | -5.3960 | 0.0045 |
| [C <sub>9</sub> C <sub>1</sub> im][(C <sub>4</sub> F <sub>9</sub> ) <sub>3</sub> PF <sub>3</sub> ]  | 4.1984 | 4.8161 | -12.7078 | -15.3442 | -50.3203 | -40.2288 | -5.0430 | 0.0065 |
| [C <sub>9</sub> C <sub>1</sub> im][C <sub>9</sub> H <sub>20</sub> CO <sub>2</sub> ]                 | 6.6756 | 5.2677 | -15.1572 | -12.3581 | -50.3203 | -79.4828 | -4.7349 | 0.0088 |
| [C <sub>9</sub> C <sub>1</sub> im][C <sub>5</sub> OC <sub>1</sub> SO <sub>4</sub> ]                 | 6.1134 | 5.9652 | -14.8231 | -10.3352 | -50.3203 | -82.0186 | -5.1541 | 0.0058 |
| [C <sub>9</sub> C <sub>1</sub> im][C <sub>8</sub> H <sub>17</sub> SO <sub>4</sub> ]                 | 5.3934 | 5.1327 | -14.9671 | -12.4733 | -50.3203 | -72.5310 | -4.0068 | 0.0182 |
| [C <sub>9</sub> C <sub>1</sub> im][BC <sub>14</sub> H <sub>8</sub> O <sub>6</sub> ]                 | 4.9577 | 4.7754 | -14.9061 | -13.1808 | -50.3203 | -65.6566 | -3.6895 | 0.0250 |
| [C <sub>9</sub> C <sub>1</sub> im][(C <sub>2</sub> H <sub>5</sub> O) <sub>2</sub> PO <sub>2</sub> ] | 6.6142 | 5.0662 | -14.9883 | -8.7736  | -50.3203 | -79.4523 | -3.7557 | 0.0234 |
| [C <sub>9</sub> C <sub>1</sub> im][C <sub>7</sub> H <sub>8</sub> SO <sub>3</sub> ]                  | 6.1315 | 4.7693 | -15.0379 | -8.8958  | -50.3203 | -78.1925 | -3.2127 | 0.0402 |
| [C <sub>9</sub> C <sub>1</sub> im][C <sub>4</sub> H <sub>9</sub> OSO <sub>4</sub> ]                 | 5.9497 | 4.8327 | -14.8696 | -8.8761  | -50.3203 | -77.2128 | -3.2207 | 0.0399 |
| [C <sub>9</sub> C <sub>1</sub> im][(CH <sub>3</sub> O) <sub>2</sub> PO <sub>2</sub> ]               | 6.9074 | 4.5348 | -15.0146 | -6.5535  | -50.3203 | -79.5814 | -2.9034 | 0.0548 |
| [C <sub>9</sub> C <sub>1</sub> im][C <sub>3</sub> H <sub>7</sub> OSO <sub>4</sub> ]                 | 6.1254 | 4.5760 | -14.8554 | -7.8129  | -50.3203 | -77.0174 | -2.8526 | 0.0577 |
| [C <sub>9</sub> C <sub>1</sub> im][(C <sub>6</sub> H <sub>5</sub> )CO <sub>2</sub> ]                | 6.6943 | 4.2611 | -15.1766 | -7.3010  | -50.3203 | -77.2645 | -2.4946 | 0.0825 |
| [C <sub>9</sub> C <sub>1</sub> im][C <sub>4</sub> H <sub>9</sub> SO <sub>4</sub> ]                  | 5.7787 | 4.1846 | -14.9313 | -8.3723  | -50.3203 | -72.1540 | -2.3499 | 0.0954 |

|                                                                                                     |        |        |          |         |          |          |         |        |
|-----------------------------------------------------------------------------------------------------|--------|--------|----------|---------|----------|----------|---------|--------|
| [C <sub>9</sub> C <sub>1</sub> im][CH <sub>3</sub> CO <sub>2</sub> ]                                | 7.7639 | 3.9363 | -15.1197 | -4.1390 | -50.3203 | -79.6259 | -1.9221 | 0.1463 |
| [C <sub>9</sub> C <sub>1</sub> im][CH <sub>3</sub> SO <sub>3</sub> ]                                | 7.0034 | 3.9568 | -14.9862 | -4.8248 | -50.3203 | -76.8542 | -2.0359 | 0.1306 |
| [C <sub>9</sub> C <sub>1</sub> im][BCl <sub>4</sub> ]                                               | 4.8415 | 2.4951 | -16.4945 | -8.1968 | -50.3203 | -53.0390 | -4.0656 | 0.0172 |
| [C <sub>9</sub> C <sub>1</sub> im][C <sub>2</sub> H <sub>5</sub> SO <sub>4</sub> ]                  | 6.0657 | 3.6506 | -14.9147 | -6.3379 | -50.3203 | -72.0671 | -1.9113 | 0.1479 |
| [C <sub>9</sub> C <sub>1</sub> im][PF <sub>6</sub> ]                                                | 5.1303 | 2.1180 | -13.9924 | -4.2375 | -50.3203 | -56.5914 | -3.9470 | 0.0193 |
| [C <sub>9</sub> C <sub>1</sub> im][C <sub>6</sub> H <sub>4</sub> BO <sub>8</sub> ]                  | 5.6128 | 3.9709 | -14.4862 | -8.6234 | -50.3203 | -61.0715 | -2.0337 | 0.1309 |
| [C <sub>9</sub> C <sub>1</sub> im][(C <sub>2</sub> F <sub>5</sub> ) <sub>3</sub> PF <sub>3</sub> ]  | 4.2438 | 4.1279 | -13.1137 | -9.4998 | -50.3203 | -41.7902 | -1.9115 | 0.1479 |
| [C <sub>9</sub> C <sub>1</sub> im][AsF <sub>6</sub> ]                                               | 5.0057 | 2.2103 | -13.9141 | -4.4668 | -50.3203 | -54.8906 | -4.0274 | 0.0178 |
| [C <sub>9</sub> C <sub>1</sub> im][N(C <sub>2</sub> F <sub>5</sub> SO <sub>2</sub> ) <sub>2</sub> ] | 4.5074 | 3.8059 | -13.4217 | -9.5679 | -50.3203 | -50.3323 | -1.9424 | 0.1434 |
| [C <sub>9</sub> C <sub>1</sub> im][ClO <sub>4</sub> ]                                               | 5.5468 | 1.8860 | -14.5623 | -3.8244 | -50.3203 | -61.6899 | -3.4612 | 0.0314 |
| [C <sub>9</sub> C <sub>1</sub> im][C <sub>7</sub> H <sub>5</sub> O <sub>3</sub> ]                   | 5.7134 | 3.3818 | -15.0154 | -7.3722 | -50.3203 | -67.3577 | -1.9073 | 0.1485 |
| [C <sub>9</sub> C <sub>1</sub> im][SbF <sub>6</sub> ]                                               | 4.7991 | 2.3575 | -13.8083 | -4.8358 | -50.3203 | -52.5788 | -4.0749 | 0.0170 |
| [C <sub>9</sub> C <sub>1</sub> im][C(SO <sub>2</sub> CF <sub>3</sub> ) <sub>3</sub> ]               | 4.4264 | 3.6960 | -13.5083 | -9.7043 | -50.3203 | -48.5232 | -2.0089 | 0.1341 |
| [C <sub>9</sub> C <sub>1</sub> im][CH <sub>3</sub> SO <sub>4</sub> ]                                | 6.1957 | 3.2560 | -14.8969 | -5.2722 | -50.3203 | -71.0882 | -1.7245 | 0.1783 |
| [C <sub>9</sub> C <sub>1</sub> im][BF <sub>4</sub> ]                                                | 5.6976 | 2.0180 | -14.4355 | -3.4777 | -50.3203 | -62.9105 | -3.0837 | 0.0458 |
| [C <sub>9</sub> C <sub>1</sub> im][C <sub>3</sub> F <sub>7</sub> CO <sub>2</sub> ]                  | 5.3544 | 3.1209 | -13.8288 | -6.2802 | -50.3203 | -61.9876 | -1.9997 | 0.1354 |
| [C <sub>9</sub> C <sub>1</sub> im][CF <sub>3</sub> SO <sub>3</sub> ]                                | 5.3492 | 2.5464 | -14.2281 | -5.0089 | -50.3203 | -60.9237 | -2.7825 | 0.0619 |
| [C <sub>9</sub> C <sub>1</sub> im][PO <sub>2</sub> (C <sub>2</sub> F <sub>5</sub> ) <sub>2</sub> ]  | 4.6883 | 3.2489 | -13.4941 | -7.9086 | -50.3203 | -54.2051 | -2.0656 | 0.1267 |
| [C <sub>9</sub> C <sub>1</sub> im][CF <sub>3</sub> CO <sub>2</sub> ]                                | 5.8365 | 2.5961 | -14.3285 | -4.2353 | -50.3203 | -64.7784 | -2.2482 | 0.1056 |
| [C <sub>9</sub> C <sub>1</sub> im][SCN]                                                             | 6.1220 | 2.2415 | -15.7765 | -4.6344 | -50.3203 | -64.8886 | -2.4563 | 0.0858 |
| [C <sub>9</sub> C <sub>1</sub> im][CH(CF <sub>3</sub> SO <sub>2</sub> ) <sub>2</sub> ]              | 4.6240 | 3.3028 | -13.8048 | -8.1416 | -50.3203 | -51.9108 | -2.2462 | 0.1058 |
| [C <sub>9</sub> C <sub>1</sub> im][C(CN) <sub>3</sub> ]                                             | 5.4184 | 2.7581 | -14.7936 | -6.1745 | -50.3203 | -53.5982 | -2.9991 | 0.0498 |
| [C <sub>9</sub> C <sub>1</sub> im][N(CF <sub>3</sub> SO <sub>2</sub> ) <sub>2</sub> ]               | 4.6707 | 3.2554 | -13.7471 | -7.7920 | -50.3203 | -52.0438 | -2.2802 | 0.1023 |
| [C <sub>9</sub> C <sub>1</sub> im][B(C <sub>2</sub> O <sub>4</sub> ) <sub>2</sub> ]                 | 5.0565 | 2.9035 | -14.2440 | -7.0047 | -50.3203 | -51.5885 | -2.7199 | 0.0659 |
| [C <sub>9</sub> C <sub>1</sub> im][B(CN) <sub>4</sub> ]                                             | 5.1675 | 3.1085 | -14.7217 | -7.9104 | -50.3203 | -49.0681 | -2.6573 | 0.0701 |
| [C <sub>9</sub> C <sub>1</sub> im][NO <sub>3</sub> ]                                                | 6.4420 | 2.4056 | -14.7697 | -3.0774 | -50.3203 | -69.3606 | -1.6274 | 0.1964 |
| [C <sub>9</sub> C <sub>1</sub> im][NO <sub>2</sub> ]                                                | 7.1498 | 2.7987 | -14.9327 | -2.6581 | -50.3203 | -74.2878 | -0.8868 | 0.4120 |

---

**Table S5.** Experimental and predicted ionic conductivity values from COSMO model, model by Chen *et al.*,<sup>23</sup> model by Gharagheizi *et al.*,<sup>33</sup> and present work for 2 ILs at 0.1 MPa

| Ionic Liquids                                                        | $T/K$  | $\sigma_{exp}/S \cdot m^{-1}$ | $\sigma_{pred,COSMO}/S \cdot m^{-1}$ | $\sigma_{pred,Chen,et\,al.}/S \cdot m^{-1}$ | $\sigma_{pred,Gharagheizi,et\,al.}/S \cdot m^{-1}$ | $\sigma_{pred,present\,work}/S \cdot m^{-1}$ |
|----------------------------------------------------------------------|--------|-------------------------------|--------------------------------------|---------------------------------------------|----------------------------------------------------|----------------------------------------------|
| [C <sub>4</sub> C <sub>1</sub> im][CH <sub>3</sub> CO <sub>2</sub> ] | 288.15 | 0.0190                        | 0.0756                               | 0.0210                                      | 0.0194                                             | 0.0212                                       |
| [C <sub>4</sub> C <sub>1</sub> im][CH <sub>3</sub> CO <sub>2</sub> ] | 298.15 | 0.0420                        | 0.1346                               | 0.0490                                      | 0.0422                                             | 0.0454                                       |
| [C <sub>4</sub> C <sub>1</sub> im][CH <sub>3</sub> CO <sub>2</sub> ] | 308.15 | 0.0830                        | 0.2238                               | 0.0970                                      | 0.0830                                             | 0.0877                                       |
| [C <sub>4</sub> C <sub>1</sub> im][CH <sub>3</sub> CO <sub>2</sub> ] | 318.15 | 0.1540                        | 0.3511                               | 0.1700                                      | 0.1490                                             | 0.1549                                       |
| [C <sub>4</sub> C <sub>1</sub> im][CH <sub>3</sub> CO <sub>2</sub> ] | 328.15 | 0.2470                        | 0.5232                               | 0.2710                                      | 0.2462                                             | 0.2537                                       |
| [C <sub>4</sub> C <sub>1</sub> im][CH <sub>3</sub> CO <sub>2</sub> ] | 338.15 | 0.3720                        | 0.7458                               | 0.3950                                      | 0.3777                                             | 0.3897                                       |
| [C <sub>4</sub> C <sub>1</sub> im][CH <sub>3</sub> CO <sub>2</sub> ] | 348.15 | 0.5360                        | 1.0226                               | 0.5360                                      | 0.5431                                             | 0.5674                                       |
| [C <sub>4</sub> C <sub>1</sub> im][CH <sub>3</sub> CO <sub>2</sub> ] | 358.15 | 0.7360                        | 1.3551                               | 0.6820                                      | 0.7382                                             | 0.7894                                       |
| [C <sub>4</sub> C <sub>1</sub> im][CF <sub>3</sub> SO <sub>3</sub> ] | 278.15 | 0.1038                        | 0.1526                               | 0.1060                                      | 0.1043                                             | 0.1006                                       |
| [C <sub>4</sub> C <sub>1</sub> im][CF <sub>3</sub> SO <sub>3</sub> ] | 288.15 | 0.1808                        | 0.2675                               | 0.1810                                      | 0.1754                                             | 0.1863                                       |
| [C <sub>4</sub> C <sub>1</sub> im][CF <sub>3</sub> SO <sub>3</sub> ] | 298.15 | 0.2900                        | 0.4383                               | 0.2880                                      | 0.2736                                             | 0.3118                                       |
| [C <sub>4</sub> C <sub>1</sub> im][CF <sub>3</sub> SO <sub>3</sub> ] | 308.15 | 0.4360                        | 0.6775                               | 0.4340                                      | 0.4019                                             | 0.4796                                       |
| [C <sub>4</sub> C <sub>1</sub> im][CF <sub>3</sub> SO <sub>3</sub> ] | 318.15 | 0.6210                        | 0.9959                               | 0.6230                                      | 0.5636                                             | 0.6881                                       |
| [C <sub>4</sub> C <sub>1</sub> im][CF <sub>3</sub> SO <sub>3</sub> ] | 328.15 | 0.8480                        | 1.4013                               | 0.8580                                      | 0.7625                                             | 0.9329                                       |
| [C <sub>4</sub> C <sub>1</sub> im][CF <sub>3</sub> SO <sub>3</sub> ] | 338.15 | 1.1170                        | 1.8980                               | 1.1400                                      | 1.0035                                             | 1.2087                                       |
| [C <sub>4</sub> C <sub>1</sub> im][CF <sub>3</sub> SO <sub>3</sub> ] | 348.15 | 1.4260                        | 2.4866                               | 1.4680                                      | 1.2921                                             | 1.5103                                       |
| [C <sub>4</sub> C <sub>1</sub> im][CF <sub>3</sub> SO <sub>3</sub> ] | 358.15 | 1.7750                        | 3.1639                               | 1.8390                                      | 1.6336                                             | 1.8335                                       |
| [C <sub>4</sub> C <sub>1</sub> im][CF <sub>3</sub> SO <sub>3</sub> ] | 368.15 | 2.1600                        | 3.9235                               | 2.2470                                      | 2.0316                                             | 2.1752                                       |

**Table S6.** 37 support vectors with respective interaction energies, dielectric energy, inverse temperature and coefficient

| Support Vector | Interaction Energy/ $kcal \cdot mol^{-1}$ |                |                  |                 |                   |                  | $1/T$  | $a_i$      |
|----------------|-------------------------------------------|----------------|------------------|-----------------|-------------------|------------------|--------|------------|
|                | $E_{MF,Cation}$                           | $E_{MF,Anion}$ | $E_{vdW,Cation}$ | $E_{vdW,Anion}$ | $E_{Diel,Cation}$ | $E_{Diel,Anion}$ |        |            |
| 1              | 5.2810                                    | 1.5133         | -9.0277          | -3.3559         | -50.0718          | -62.9105         | 0.0031 | -120.7303  |
| 2              | 5.1545                                    | 1.6427         | -11.4416         | -3.4973         | -50.1150          | -62.9105         | 0.0035 | 1024.0000  |
| 3              | 7.7444                                    | 3.7652         | -10.0962         | -4.1826         | -50.0718          | -79.6259         | 0.0035 | -406.2031  |
| 4              | 8.0141                                    | 3.9206         | -9.8350          | -4.0761         | -50.0718          | -79.6259         | 0.0032 | 300.9948   |
| 5              | 4.2526                                    | 5.1387         | -7.7526          | -12.4516        | -50.6750          | -72.5310         | 0.0034 | 52.2499    |
| 6              | 5.3886                                    | 2.3907         | -9.0956          | -4.1631         | -50.0718          | -64.7784         | 0.0032 | 522.3277   |
| 7              | 7.0009                                    | 3.7645         | -7.8316          | -4.8269         | -50.6750          | -76.8542         | 0.0034 | 42.4118    |
| 8              | 2.5275                                    | 4.6340         | -6.3436          | -9.5153         | -50.6750          | -41.7902         | 0.0036 | 27.8009    |
| 9              | 3.0450                                    | 5.0327         | -5.8761          | -8.7314         | -50.6750          | -41.7902         | 0.0028 | -21.7742   |
| 10             | 3.6582                                    | 4.3155         | -10.1368         | -9.4516         | -50.1150          | -41.7902         | 0.0034 | 147.2653   |
| 11             | 3.9656                                    | 4.5156         | -9.6687          | -8.9911         | -50.1150          | -41.7902         | 0.0029 | -143.8745  |
| 12             | 5.2901                                    | 3.3808         | -7.7509          | -6.3431         | -50.6750          | -72.0671         | 0.0034 | -66.3771   |
| 13             | 5.5113                                    | 3.5427         | -7.5446          | -6.1677         | -50.6750          | -72.0671         | 0.0031 | 11.8034    |
| 14             | 3.9164                                    | 4.3404         | -8.0666          | -8.9189         | -50.0718          | -50.3323         | 0.0029 | 55.6509    |
| 15             | 3.8423                                    | 4.2502         | -8.1643          | -9.0388         | -50.0718          | -50.3323         | 0.0030 | 87.4035    |
| 16             | 3.3067                                    | 3.5908         | -8.7222          | -9.7425         | -50.0718          | -50.3323         | 0.0037 | -982.2992  |
| 17             | 4.3108                                    | 1.7987         | -8.4385          | -4.0022         | -50.0718          | -56.5914         | 0.0030 | 75.0997    |
| 18             | 4.3933                                    | 1.8652         | -8.3373          | -3.9527         | -50.0718          | -56.5914         | 0.0029 | 110.8266   |
| 19             | 4.4742                                    | 1.9321         | -8.2341          | -3.9022         | -50.0718          | -56.5914         | 0.0028 | 254.4568   |
| 20             | 4.2679                                    | 1.6843         | -11.0783         | -4.2914         | -50.1150          | -56.5914         | 0.0036 | -1024.0000 |
| 21             | 4.3737                                    | 1.7474         | -10.9788         | -4.2523         | -50.1150          | -56.5914         | 0.0035 | -361.8471  |
| 22             | 5.6806                                    | 1.6143         | -9.6743          | -4.6866         | -50.1735          | -64.8886         | 0.0034 | -25.3793   |
| 23             | 3.0226                                    | 3.1181         | -6.8226          | -7.7581         | -50.6750          | -52.0438         | 0.0034 | -129.4555  |
| 24             | 3.4177                                    | 2.9425         | -8.9542          | -7.9471         | -50.0718          | -52.0438         | 0.0037 | 1024.0000  |
| 25             | 3.5579                                    | 3.0891         | -8.8394          | -7.8275         | -50.0718          | -52.0438         | 0.0035 | 216.5822   |
| 26             | 3.8926                                    | 3.0208         | -10.9313         | -7.9313         | -50.1150          | -52.0438         | 0.0036 | 293.0616   |
| 27             | 4.9553                                    | 4.0325         | -9.5051          | -6.7917         | -50.1150          | -52.0438         | 0.0025 | 56.9571    |
| 28             | 3.4065                                    | 2.5715         | -7.9250          | -8.4625         | -50.6750          | -49.0681         | 0.0036 | 87.8615    |
| 29             | 3.9899                                    | 3.1308         | -7.2846          | -7.8305         | -50.6750          | -49.0681         | 0.0028 | 40.7075    |

|    |        |        |          |         |          |          |        |            |
|----|--------|--------|----------|---------|----------|----------|--------|------------|
| 30 | 6.1801 | 2.1679 | -12.6341 | -3.2767 | -50.2776 | -62.9105 | 0.0029 | -105.7965  |
| 31 | 5.8173 | 2.0159 | -13.1014 | -3.3981 | -50.2776 | -62.9105 | 0.0031 | -34.3757   |
| 32 | 5.9414 | 2.0666 | -12.9497 | -3.3587 | -50.2776 | -62.9105 | 0.0030 | -54.2756   |
| 33 | 4.2538 | 2.0489 | -9.3551  | -5.1213 | -50.0718 | -60.9237 | 0.0037 | 19.9874    |
| 34 | 4.7311 | 2.3647 | -8.9720  | -4.9013 | -50.0718 | -60.9237 | 0.0032 | -77.3488   |
| 35 | 4.9314 | 2.5029 | -8.7743  | -4.7877 | -50.0718 | -60.9237 | 0.0030 | -1024.0000 |
| 36 | 5.1946 | 2.1864 | -12.6032 | -4.1164 | -50.2776 | -56.5914 | 0.0031 | 221.4790   |
| 37 | 4.5450 | 3.2868 | -12.6672 | -7.7409 | -50.2776 | -52.0438 | 0.0033 | -95.1906   |

---
